# Supplementary material for: Interplay between anti–anti and syn–anti conformations of thiourea modulating ON–OFF catalysis
Source: Royal Society of Chemistry journal article supplement (doi:10.1039/d3dt02398b), 2023-01-01
Supplement: d3dt02398b1.pdf [file d3dt02398b1.pdf]

Supplementary Information  
for

**Interplay between anti-anti and syn-anti conformation of thiourea  
modulating ON-OFF catalysis**

Renitta Benny and Soumen De\*

School of Chemistry, Indian Institute of Science Education and Research Thiruvananthapuram (IISER-TVM),  
Thiruvananthapuram 695551, India

Email: [soumende@iisertvm.ac.in](mailto:soumende@iisertvm.ac.in)

**Contents**

|                                                                                                    |    |
|----------------------------------------------------------------------------------------------------|----|
| 1. Synthesis.....                                                                                  | 2  |
| 1.1 General information .....                                                                      | 2  |
| 1.2 Synthetic Scheme for Switch 1 .....                                                            | 3  |
| 1.3 Synthesis of 2-(1,10-phenanthroline-2-yl) aniline .....                                        | 3  |
| 1.4 Synthesis of the molecular switch 1 .....                                                      | 3  |
| 1.5 Synthesis of Copper complex [Cu (1)(3)]PF <sub>6</sub> .....                                   | 4  |
| 2. Characterization .....                                                                          | 5  |
| 3. D <sub>2</sub> O exchange studies.....                                                          | 13 |
| 4. Metal induced reversible switching .....                                                        | 14 |
| 5. Concentration dependent <sup>1</sup> H NMR .....                                                | 16 |
| 6. Comparison of UV-Visible spectra of 1 & [Cu (1)(3)] PF <sub>6</sub> .....                       | 17 |
| 7. Catalytic studies .....                                                                         | 17 |
| 7.1 Model reactions .....                                                                          | 17 |
| 7.1.2 General procedure for model catalytic reactions.....                                         | 17 |
| 7.2 In situ changes in the yield of the reaction by alternating switching between two states ..... | 30 |
| 9. Geometry optimised structures of [Cu(1)(3)] <sup>+</sup> : .....                                | 34 |
| References.....                                                                                    | 82 |

## 1. Synthesis

### 1.1 General information

All chemicals used in this study were procured from commercial suppliers and were utilized without any additional purification steps. Solvents were also employed without further purification unless specifically stated otherwise. Deionized water was acquired via a Millipore milli-Q water purifier.

Nuclear Magnetic Resonance (NMR) spectra were obtained using a Bruker Avance 500 MHz spectrometer, and deuterated solvents were used as the lock. The chemical shifts were referenced to the residual protiated fraction of the respective solvents ( $\text{CHCl}_3$ :  $\delta \text{H} = 7.26$  ppm,  $\text{CH}_2\text{Cl}_2$ :  $\delta \text{H} = 5.32$  ppm). The following abbreviations were utilized in the  $^1\text{H}$  NMR assignments to describe splitting patterns: (s: singlet, d: doublet, t: triplet, dd: doublet of doublets, br: broad singlet, td: triplet of doublets, m: multiplet). The coupling constants were expressed in Hertz (Hz), denoting the number of protons involved, along with the assignment of protons when possible.

High-resolution mass spectra (HRMS) were recorded on a Thermo Scientific™ Q Exactive™ Hybrid Quadrupole-Orbitrap Mass Spectrometer using the electrospray ionization (ESI) technique. The calculated  $m/z$  values were obtained from ThermoXCalibur software.

UV-vis spectra were recorded on a Shimadzu UV-3600 Vis-NIR spectrophotometer at room temperature using a quartz cuvette with a path length of 1 mm. For UV-vis analysis, solutions were freshly prepared by dissolving isolated compounds in UV-grade solvents, unless explicitly mentioned otherwise.

All calculations were carried out using the Gaussian 16 program package.<sup>[1]</sup> Calculations were performed by the density functional theory (DFT) method with restricted B3LYP (Becke's three-parameter hybrid exchange functional and the Lee-Yang-Parr correlation functional) 6 level, employing a basis sets 6-311G(d,p).

## 1.2 Synthetic Scheme for Switch 1

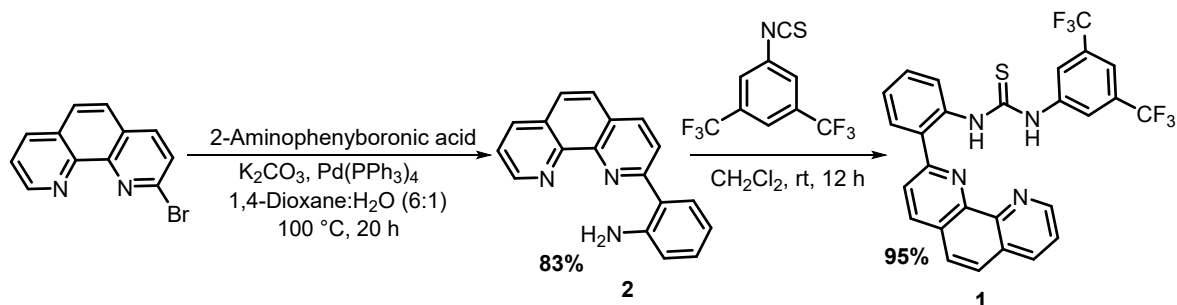

Scheme S 1: Synthesis of switch 1.

## 1.3 Synthesis of 2-(1,10-phenanthroline-2-yl) aniline

2-Bromo-1,10-phenanthroline (1.00 g, 3.86 mmol), 2-aminophenyl boronic acid (529 mg, 3.86 mmol) and  $K_2CO_3$  (1.60 g, 11.6 mmol) were added to a mixture of 1,4-dioxane and water (6:1) and the mixture was then purged with argon gas for two hours. The reaction mixture was heated to 100 °C for 5 minutes, and then  $Pd(PPh_3)_4$  (223 mg, 193  $\mu$ mol) was added. The mixture was further heated at the same temperature for 20 hours. After completion of the reaction, the solvent was removed under reduced pressure, and the residue was extracted with ethyl acetate (3 portions, 50 mL each). The organic layers were combined and dried over  $MgSO_4$ . The solvent was evaporated under reduced pressure, and the resulting crude product was purified by column chromatography using silica gel as the stationary phase and a mixture of hexane and ethyl acetate in a ratio of 6:4 as the mobile phase. The purified product was obtained as yellow solid, weighing 950 mg.

**Yield= 83%**

**$^1H$  NMR (500 MHz,  $CDCl_3$ )**  $\delta$  9.13 (d,  $^3J=4.5$  Hz, 1 H), 8.23- 8.19 (m, 2 H), 8.06 (d,  $^3J=8.6$  Hz, 1 H), 7.81 (d,  $^3J=8.2$  Hz, 1 H), 7.74 -7.69 (m, 2 H), 7.58 (dd,  $^3J=8.2$  Hz,  $^4J=4.5$  Hz, 1 H), 7.21 (t,  $^3J=7.8$  Hz, 1 H), 6.85 (d,  $^3J=7.8$  Hz, 1 H), 6.79 (t,  $^3J=7.5$  Hz, 1 H), 6.04 (br, 2 H).

**$^{13}C$  NMR (126 MHz,  $CDCl_3$ )**  $\delta$  158.7, 150.2, 148.4, 145.8, 144.3, 136.3, 135.8, 130.4, 129.0, 128.8, 126.0 (2), 125.6, 122.8, 121.0, 120.6, 117.6, 116.7.

**HRMS (ESI) m/z:**  $[M + H]^+$ ; Calculated ( $C_{18}H_{13}N_3 + H$ ): 272.1182, Found: 272.1179.

## 1.4 Synthesis of the molecular switch 1

Under an inert atmosphere, 2-(1,10-phenanthroline-2-yl) aniline (**2**) (100 mg, 0.37 mmol) was dissolved in dry DCM (5 mL), 1-isothiocyanato-3,5-bis(trifluoromethyl)benzene (1.34 mL, 0.732 mmol) was added to this solution, and the mixture was stirred at room temperature overnight. The reaction mixture was then extracted with DCM (3 portions, 50 mL each), and

the combined organic layer was dried over  $\text{MgSO}_4$ . The solvent was evaporated under reduced pressure, and the resulting crude product was purified by column chromatography using a mixture of DCM and hexane in a 1:1 ratio as the eluent. The purified product was obtained as yellow solid, weighing 190 mg.

**Yield= 95%**

**$^1\text{H}$  NMR (500 MHz,  $\text{CDCl}_3$ )**  $\delta$  16.60 (s, 1 H), 10.92 (s, 1 H), 9.38 (d,  $^3J=8.6$  Hz, 1 H), 8.75-8.74 (m, 1 H), 8.35 (d,  $^3J= 8.6$  Hz, 2 H), 8.24 (d,  $^3J= 9$  Hz, 1 H), 8.04 (s, 2 H), 8.02 (d,  $^3J= 8$  Hz, 1 H), 7.84 (s, 2 H), 7.68 (s, 1 H), 7.63 (dd,  $^3J=8$  Hz,  $^4J=4.4$  Hz 1 H), 7.51 (t,  $^3J= 7.8$  Hz 1 H), 7.23 (t,  $^3J= 7.8$  Hz, 1 H).

**$^{13}\text{C}$  NMR (126 MHz,  $\text{CDCl}_3$ )**  $\delta$  179.5, 157.1, 150.0, 145.0, 142.4, 141.4, 141.0, 137.6, 137.5, 131.7, 131.4, 130.5, 129.8, 128.1, 126.9, 126.5, 125.4, 124.3, 123.6, 123.5, 123.3, 123.0, 122.1, 121.0.

**HRMS (ESI) m/z:**  $[\text{M}]^+$  Calculated ( $\text{C}_{26}\text{H}_{16}\text{N}_4\text{F}_6\text{S} +\text{H}$ ): 543.1073, Found: 543.1072

### 1.5 Synthesis of Copper complex $[\text{Cu}(\mathbf{1})(\mathbf{3})]\text{PF}_6$

Switch **1** (3 mg, 5.50  $\mu\text{mol}$ ), dimesityl phenanthroline **3** (2.29 mg, 5.50  $\mu\text{mol}$ ), and  $[(\text{Cu}(\text{CH}_3\text{CN})_4)\text{PF}_6]$  (2.05 mg, 5.50  $\mu\text{mol}$ ) were dissolved in  $\text{CD}_2\text{Cl}_2$  in NMR tube at room temperature to obtain  $[\text{Cu}(\mathbf{1})(\mathbf{3})]\text{PF}_6$  in quantitative yield. The color of the complex turns red upon the addition of Cu salt.

**$^1\text{H}$  NMR (500 MHz,  $\text{CD}_2\text{Cl}_2$ )**  $\delta$  8.63 (d,  $^3J= 8.4$  Hz, 3 H), 8.46 (d,  $^3J= 8.0$  Hz, 1 H), 8.41 (d,  $^3J= 8.0$  Hz, 1 H), 8.21 (s, 2 H), 8.11 (br, 1 H), 7.92- 7.87 (m, 5 H), 7.76- 7.78 (m, 1 H), 7.70 (d,  $^3J= 8.0$  Hz, 2 H), 7.61 (s, 1 H), 7.31 (br, 1 H), 7.23 (d,  $^3J= 6.2$  Hz, 1 H), 6.95- 6.98 (m, 1 H), 6.83 (d,  $^3J= 8.0$  Hz, 1 H), 6.27 (s, 2 H), 6.13 (s, 2 H), 5.72- 5.75 (m, 1 H)

**HRMS (ESI) m/z:**  $[\text{M}]^+$  Calculated ( $\text{C}_{57}\text{H}_{44}\text{N}_6\text{F}_6\text{SCu}$ ): 1021.2543, Found: 1021.2537

## 2. Characterization

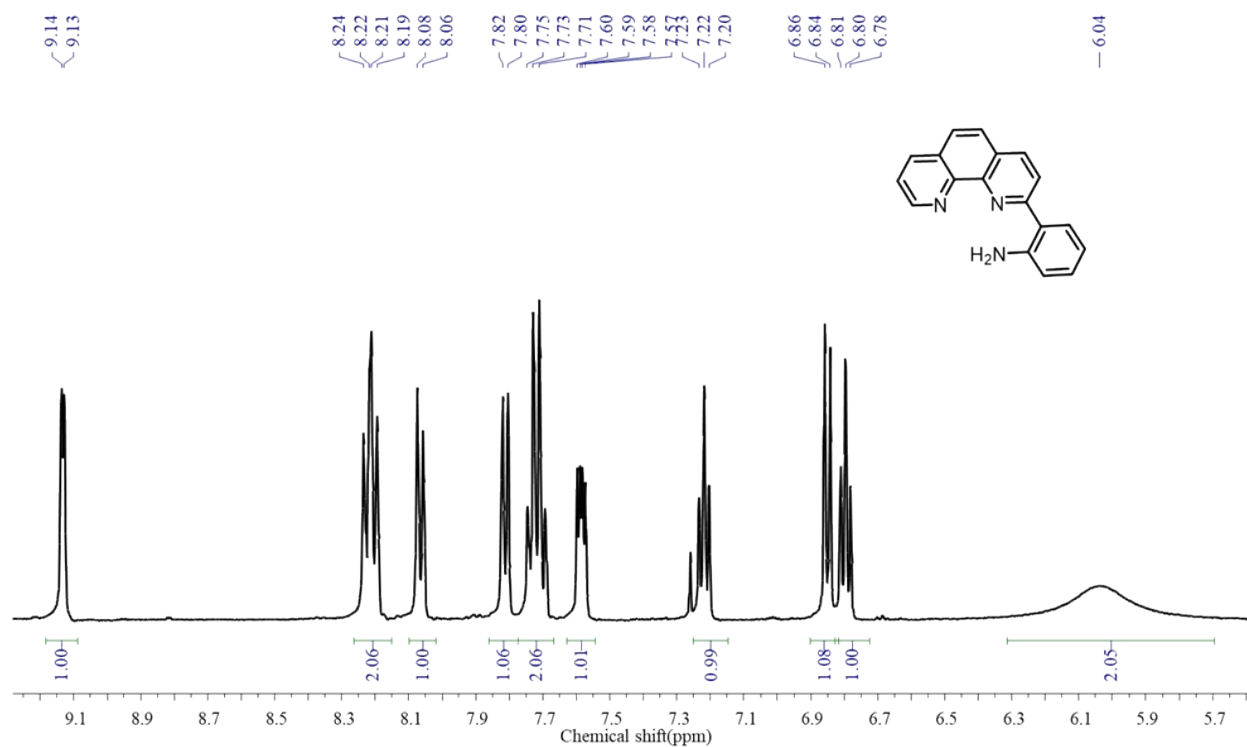

**Figure S 1:** Partial  $^1\text{H}$  NMR (500 MHz,  $\text{CDCl}_3$ , 298 K) spectrum of compound 2.

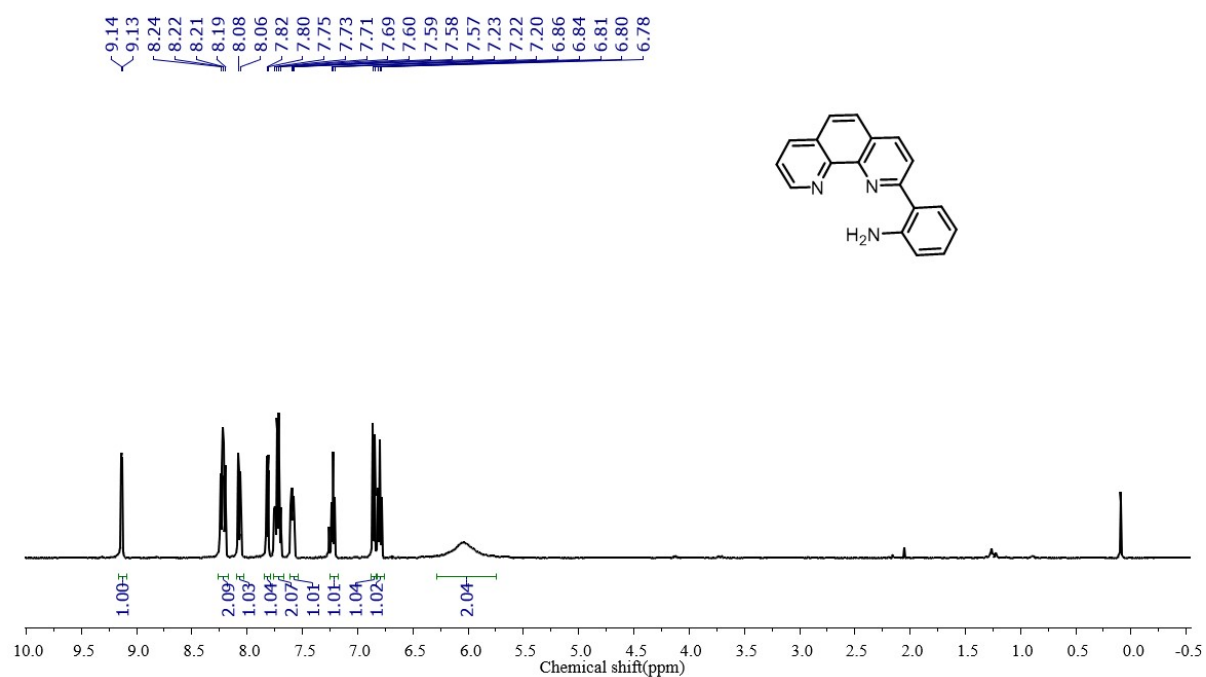

**Figure S 2:**  $^1\text{H}$  NMR (500 MHz,  $\text{CDCl}_3$ , 298 K) spectrum of compound 2.

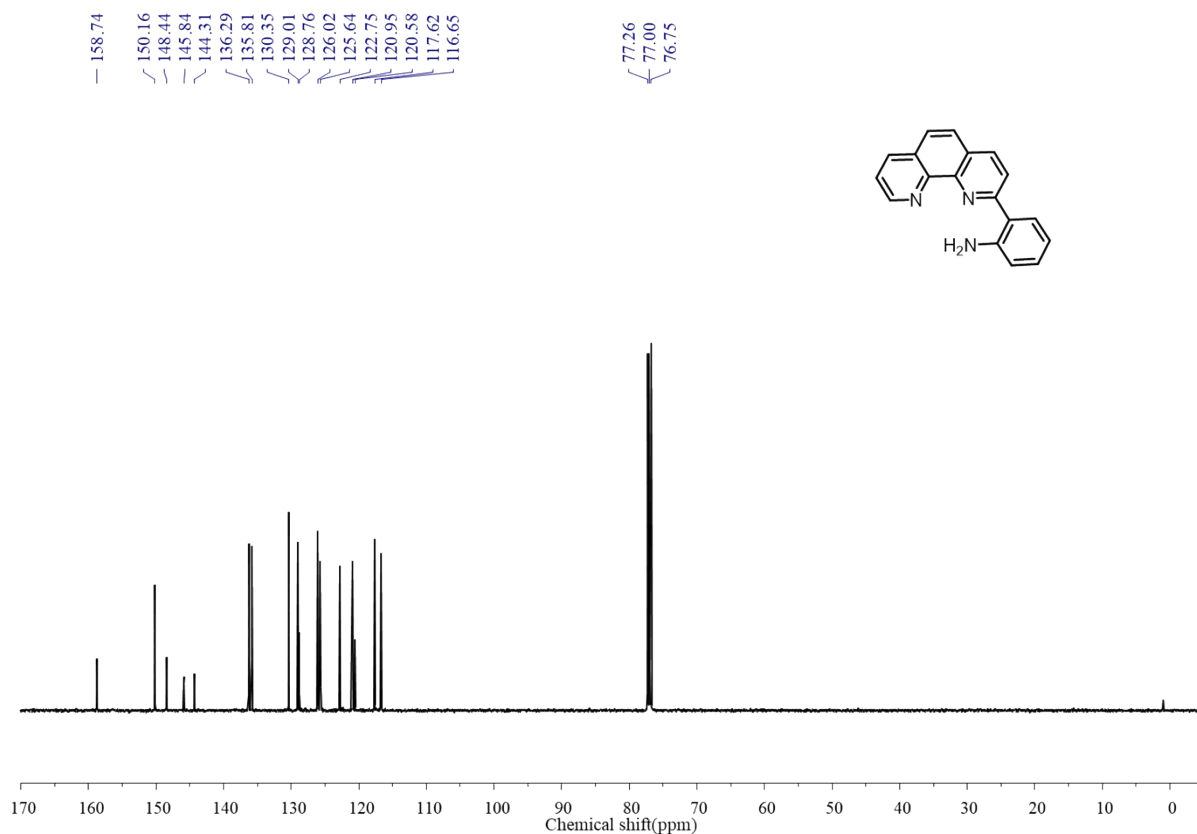

**Figure S 3:**  $^{13}\text{C}$  NMR (126 MHz,  $\text{CDCl}_3$ , 298 K) spectrum of compound 2.

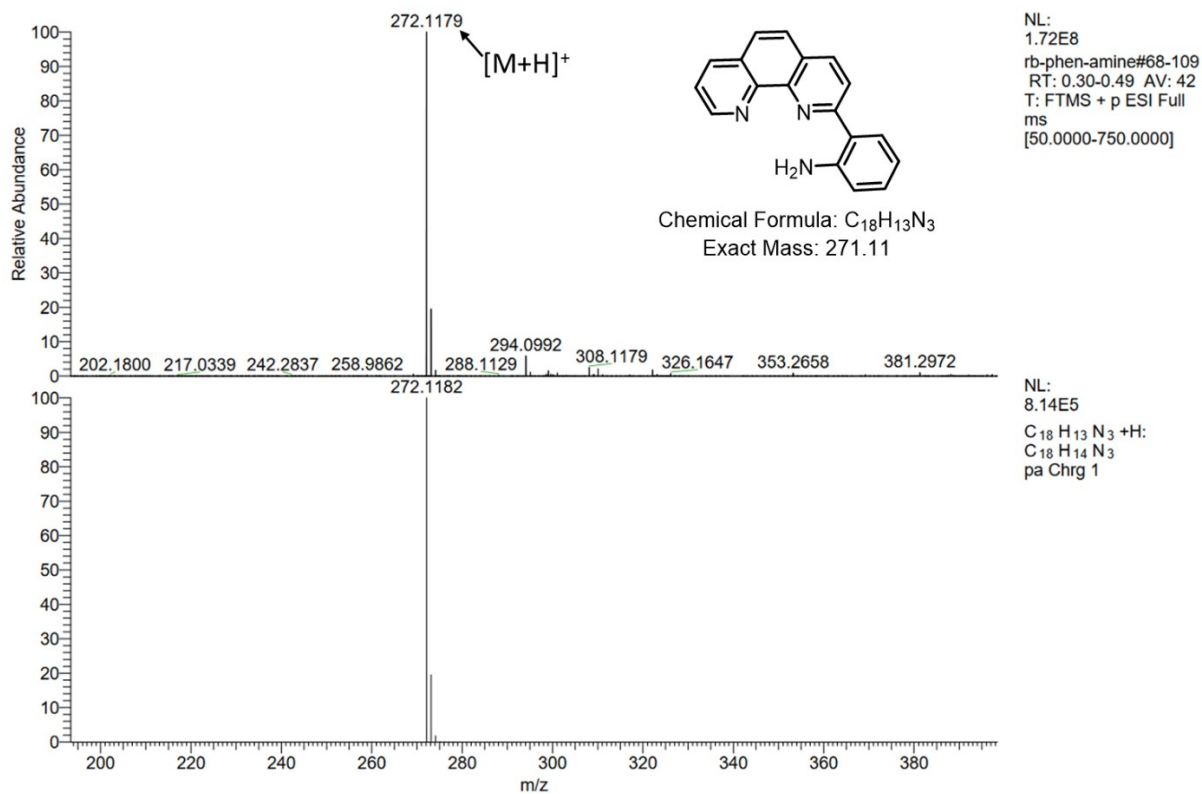

**Figure S 4:** High-Resolution Mass Spectrum (HRMS) of a) experimental and b) theoretical of compound 2

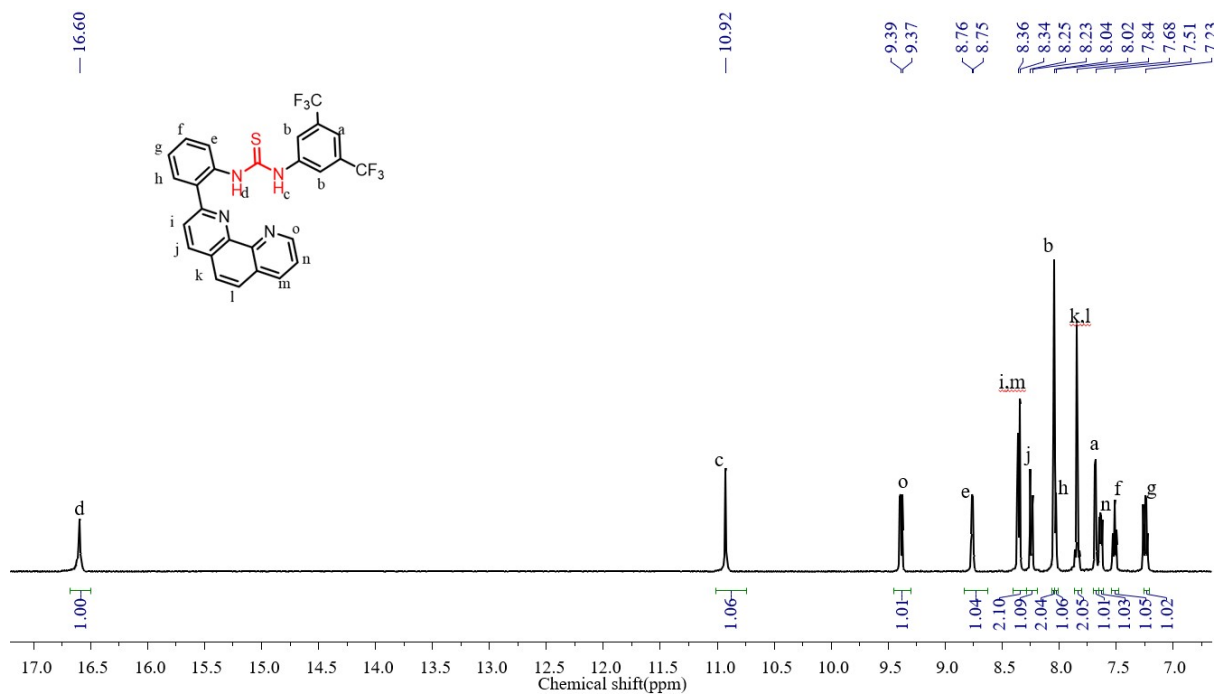

**Figure S 5:** Partial  $^1\text{H}$  NMR (500 MHz,  $\text{CDCl}_3$ , 298 K) spectrum of compound **1**.

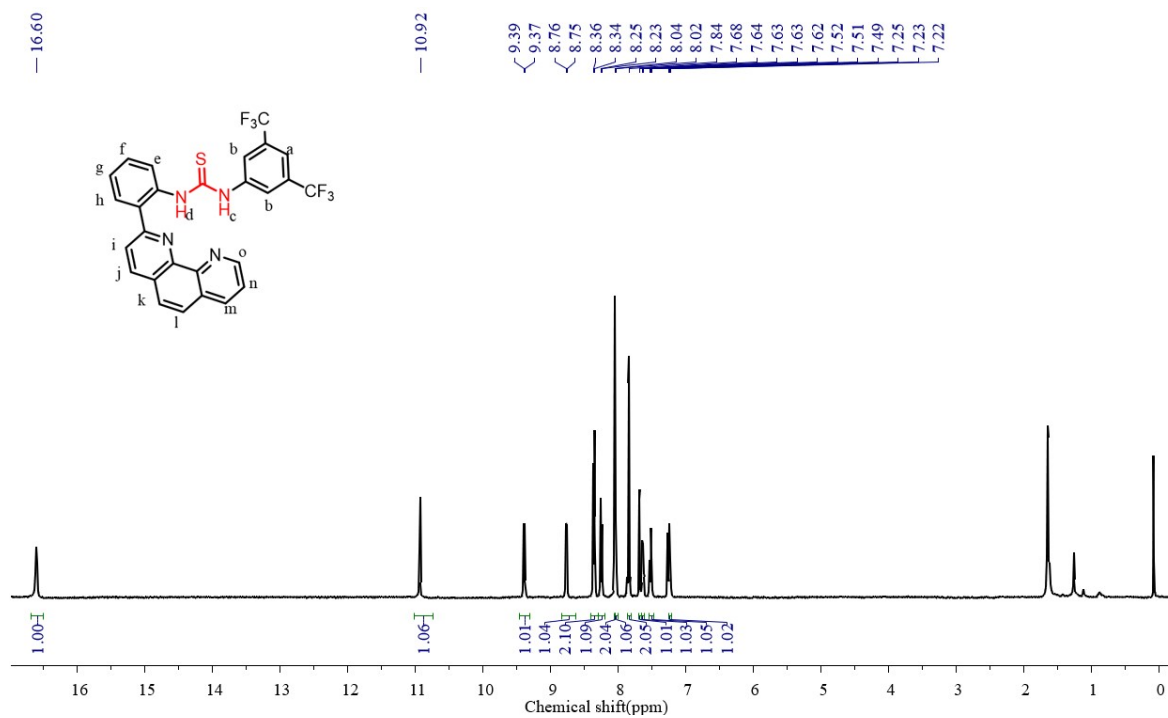

**Figure S 6:**  $^1\text{H}$  NMR (500 MHz,  $\text{CDCl}_3$ , 298 K) spectrum of compound **1**.

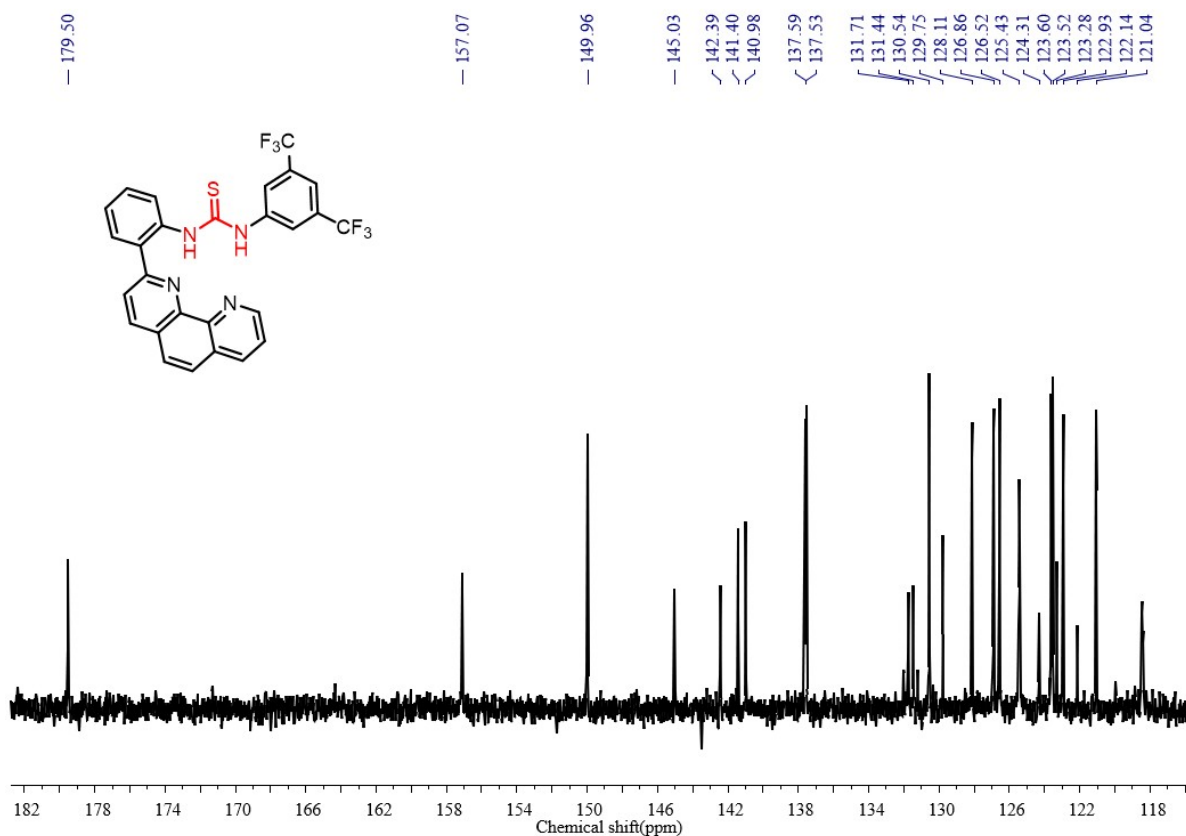

**Figure S 7:** Partial  $^{13}\text{C}$  NMR (126 MHz,  $\text{CDCl}_3$ , 298 K) spectrum of compound 1.

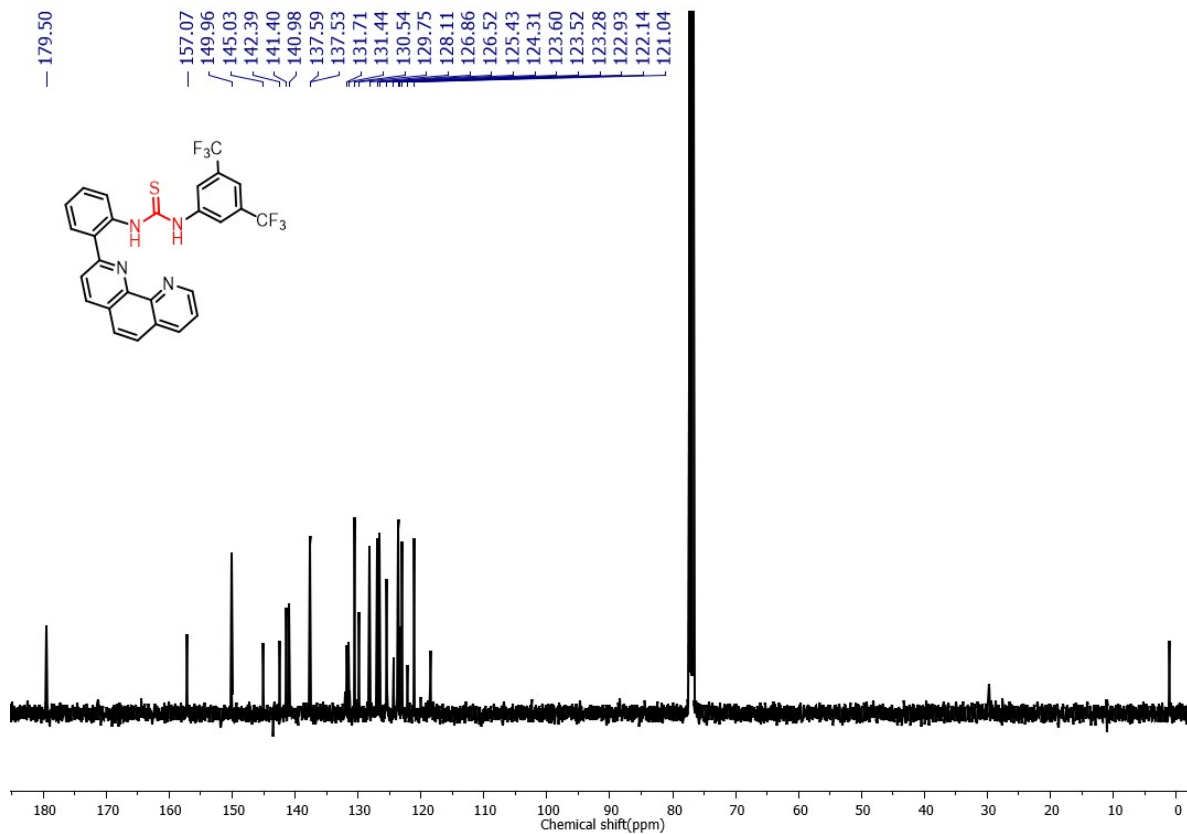

**Figure S 8:**  $^{13}\text{C}$  NMR (126 MHz,  $\text{CDCl}_3$ , 298 K) spectrum of compound 1.



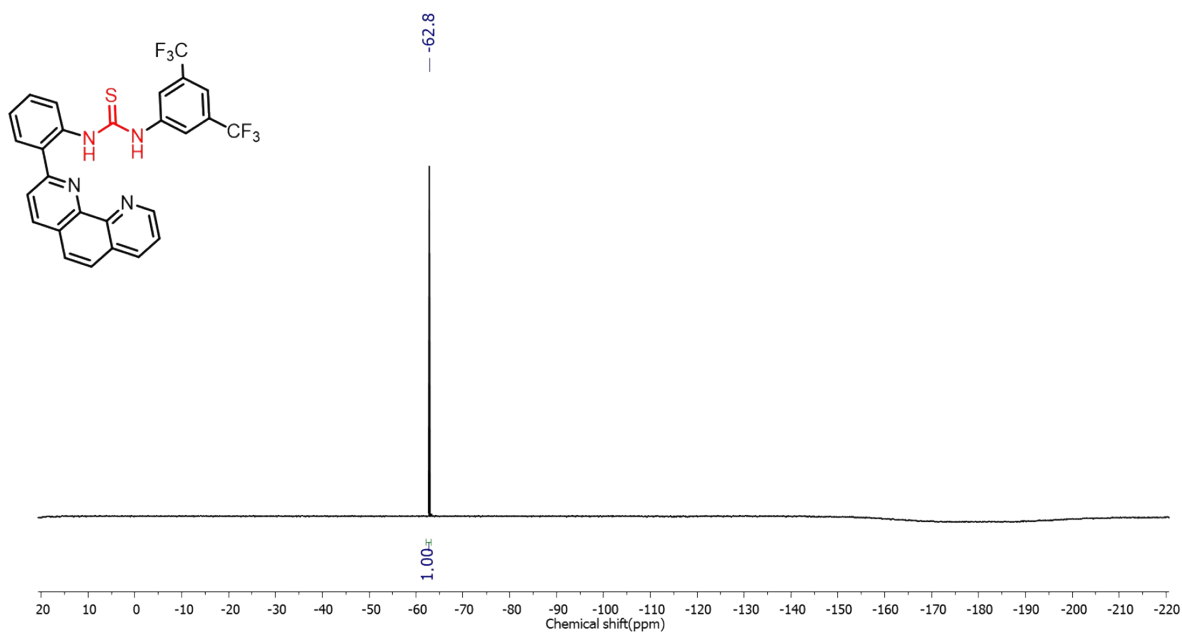

**Figure S 9:**  $^{19}\text{F}$  NMR (471 MHz, 298 K) spectrum of compound **1**.

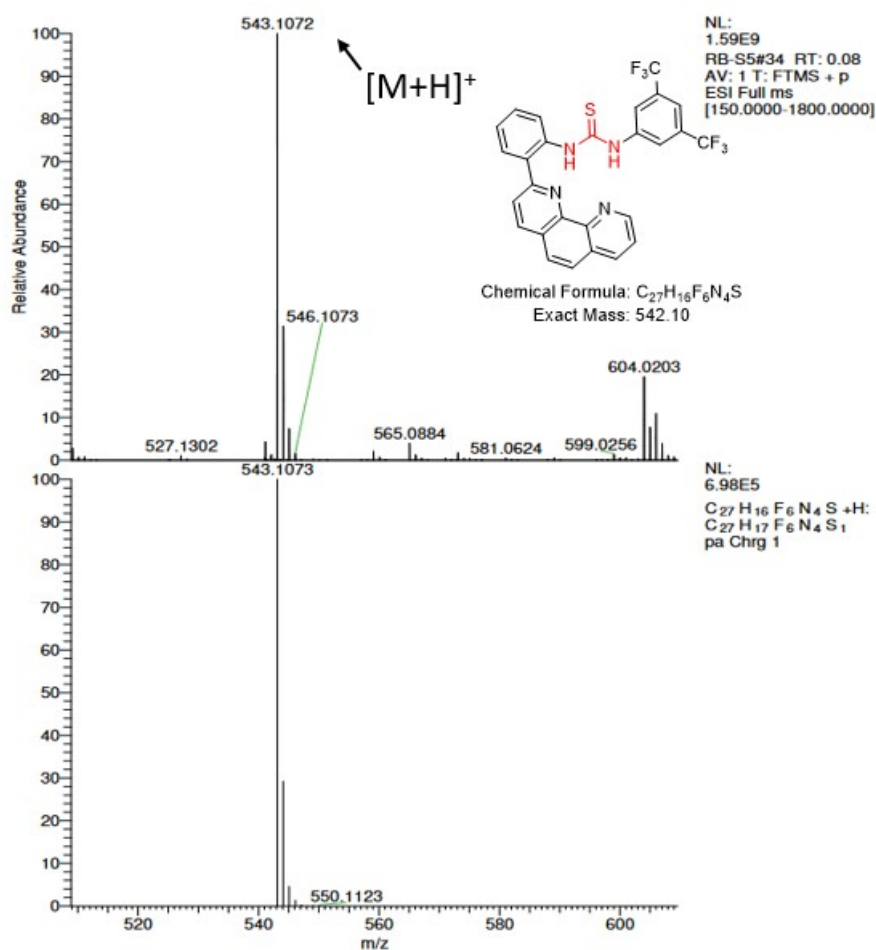

**Figure S 10:** High-Resolution Mass Spectrum (HRMS) of a) experimental and b) theoretical of compound **1**.

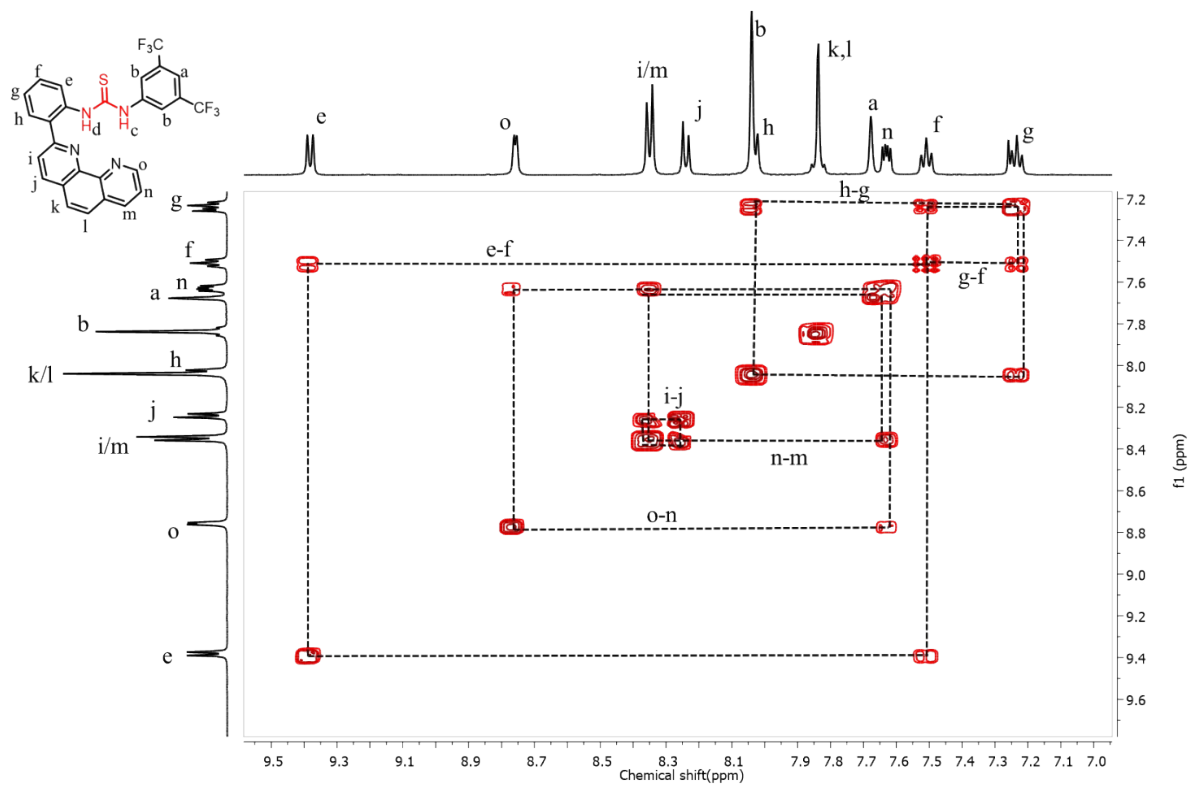

Figure S 11: Partial  $^1\text{H}$ - $^1\text{H}$  COSY (500 MHz,  $\text{CDCl}_3$ , 298 K) spectrum of compound **1**.

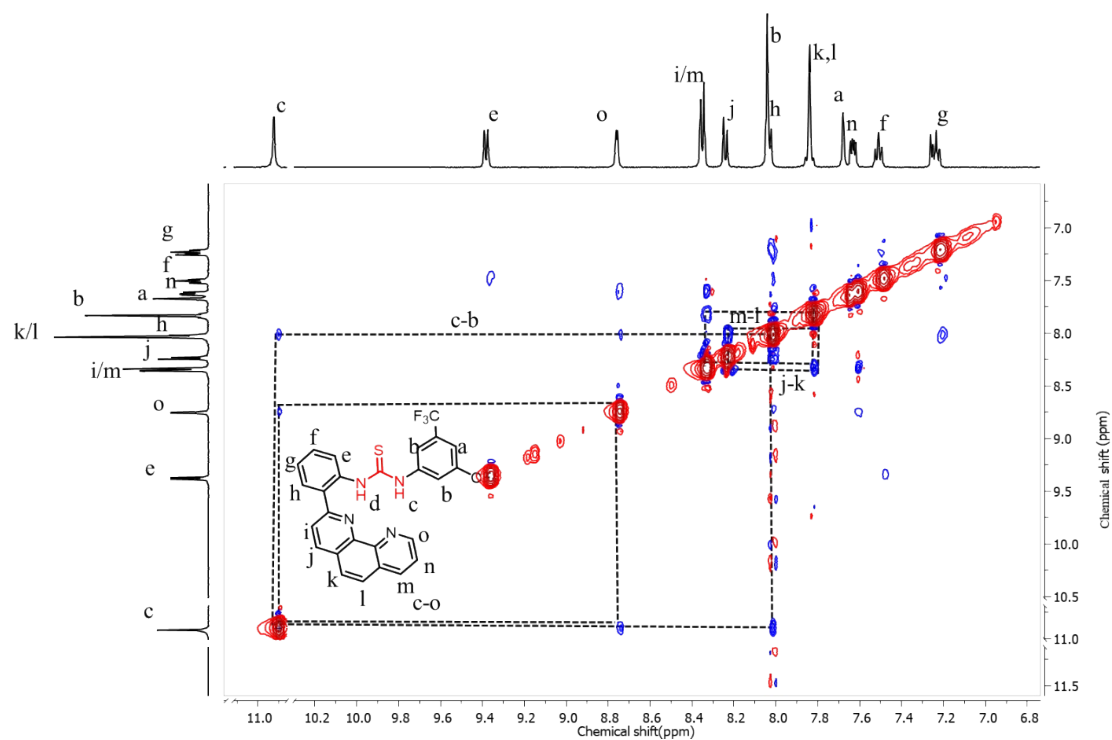

Figure S 12: Partial  $^1\text{H}$ - $^1\text{H}$  NOESY (500 MHz,  $\text{CDCl}_3$ , 298 K) spectrum of compound **1**.

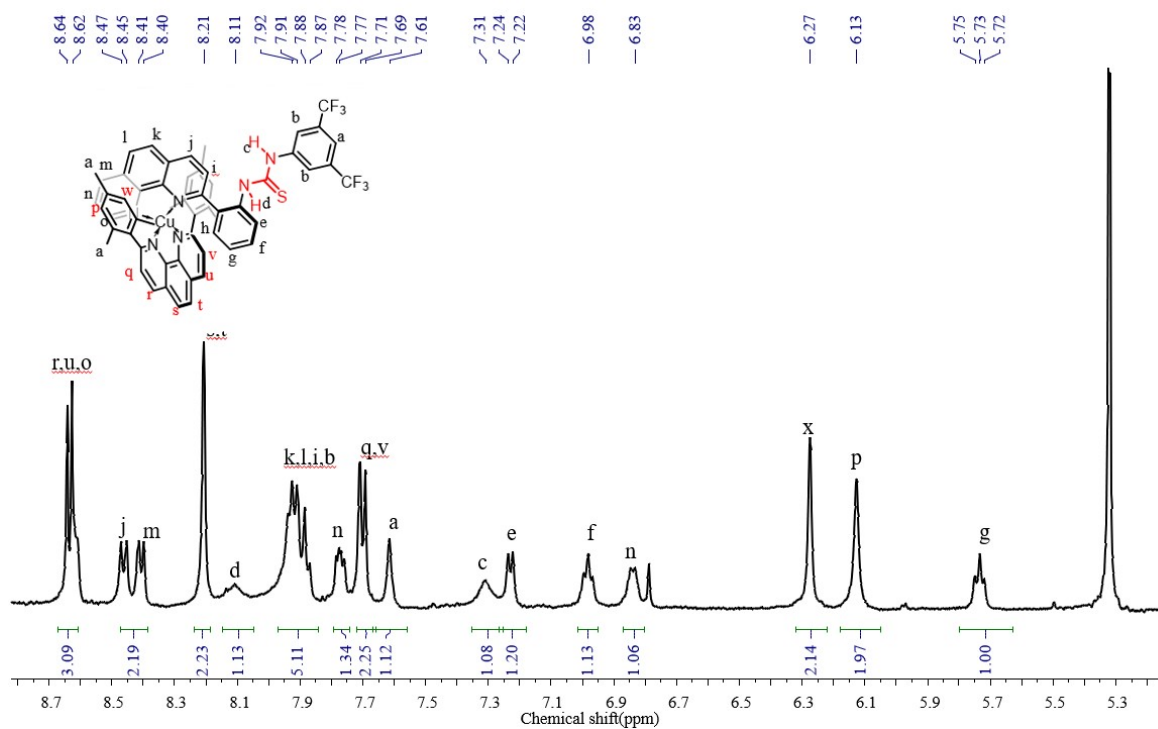

Figure S 13: Partial  $^1\text{H}$  NMR (500 MHz,  $\text{CD}_2\text{Cl}_2$ , 298 K) spectrum of  $[\text{Cu}(\mathbf{1})(\mathbf{3})]\text{PF}_6$

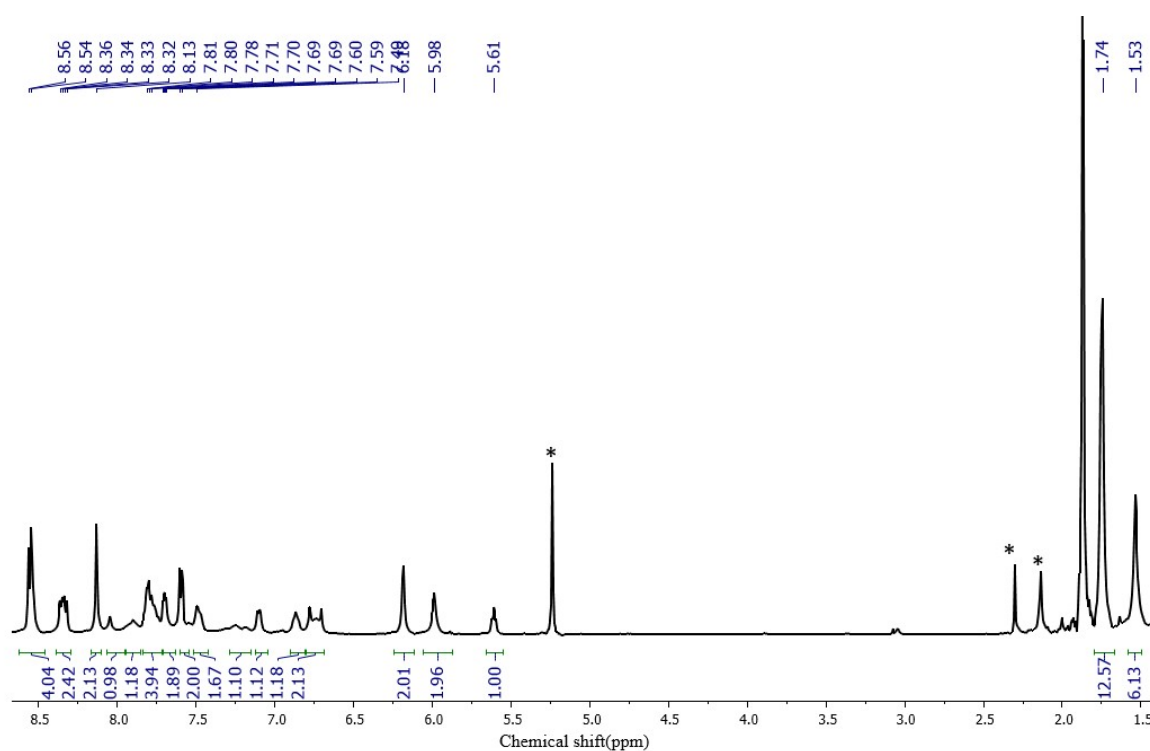

Figure S 14:  $^1\text{H}$  NMR (500 MHz,  $\text{CD}_2\text{Cl}_2$ , 298 K) spectrum of  $[\text{Cu}(\mathbf{1})(\mathbf{3})]\text{PF}_6$ .

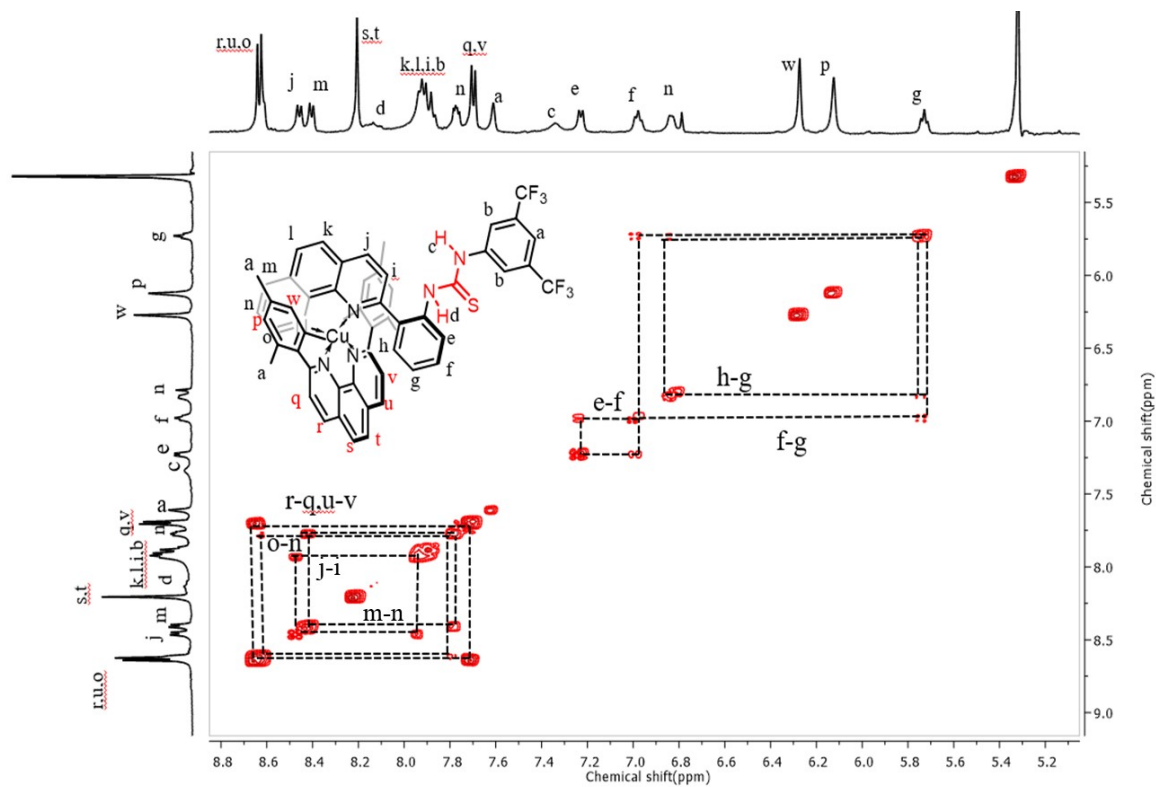

**Figure S 15:** Partial  $^1\text{H}$ - $^1\text{H}$  COSY (500 MHz,  $\text{CD}_2\text{Cl}_2$ , 298 K) spectrum of  $[\text{Cu} (1)(3)]\text{PF}_6$ .

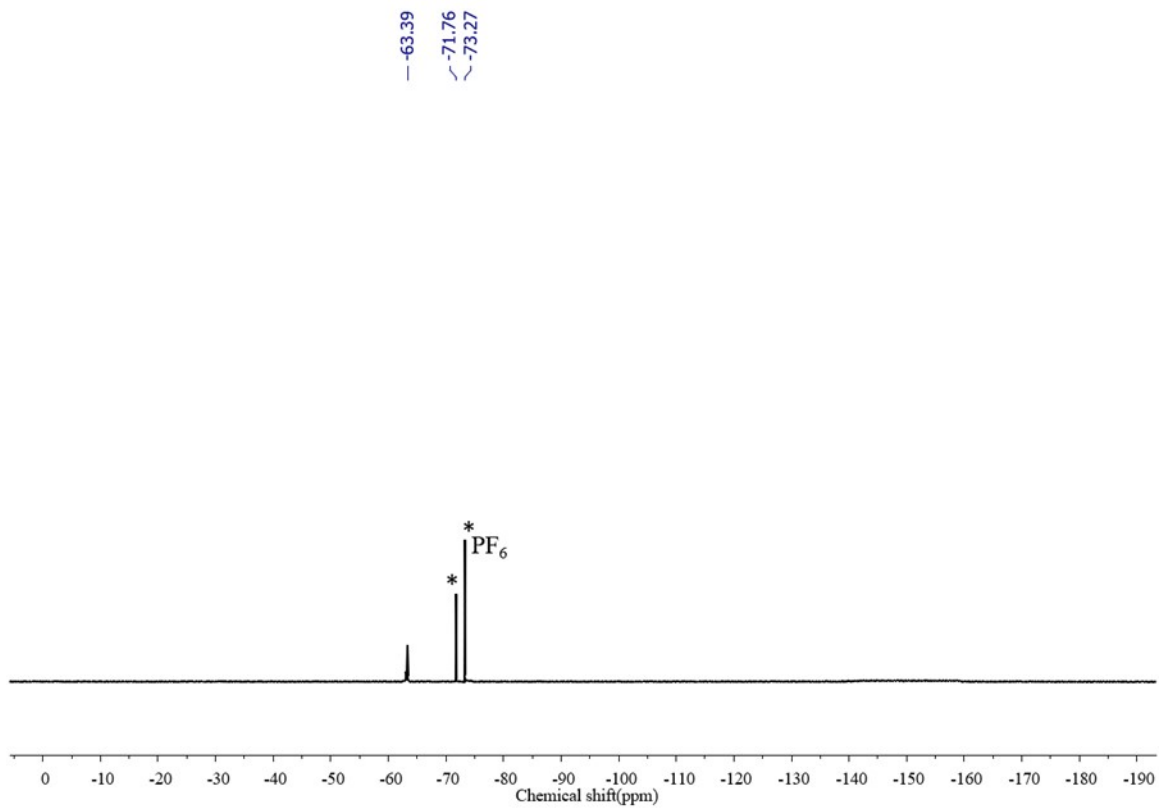

**Figure S 16:**  $^{19}\text{F}$  (471 MHz,  $\text{CD}_2\text{Cl}_2$ , 298 K) NMR spectrum of  $[\text{Cu} (1)(3)]\text{PF}_6$ .

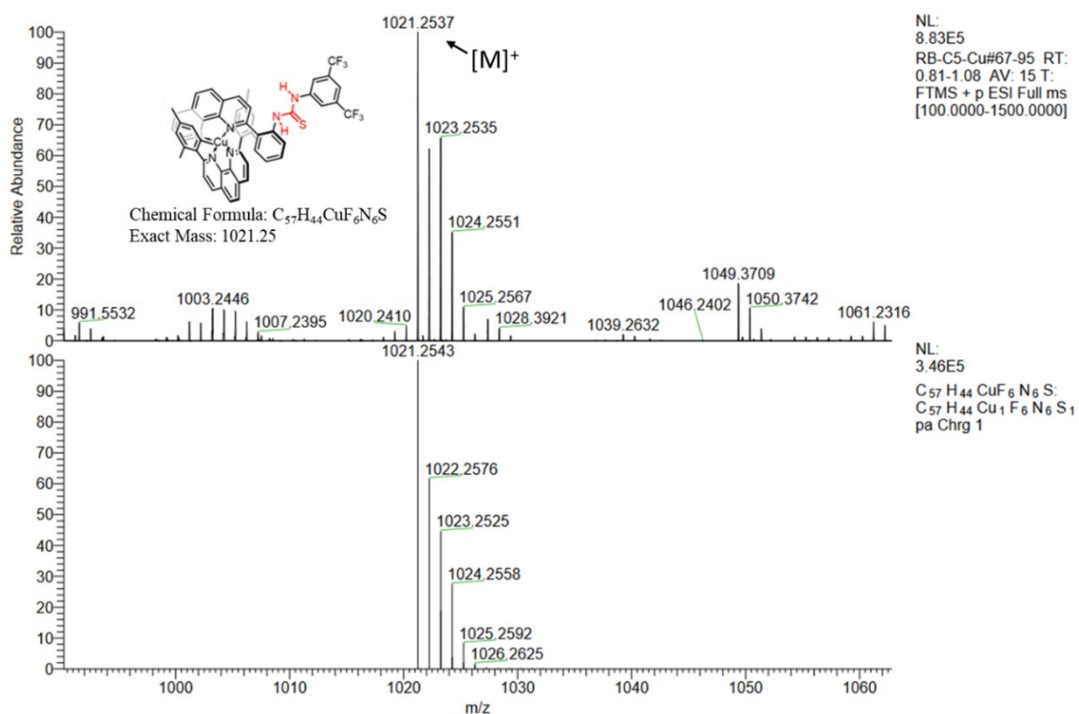

**Figure S 17:** High-Resolution Mass Spectrometry (HRMS) a) experimental and b) theoretical of  $[\text{Cu}(\mathbf{1})(\mathbf{3})]\text{PF}_6$ .

### 3. $\text{D}_2\text{O}$ exchange studies

Sample was taken in an NMR tube and dissolved in deuteriated ( $\text{CDCl}_3$  for  $\mathbf{1}$  and  $\text{CD}_2\text{Cl}_2$  for  $[\text{Cu}(\mathbf{1})(\mathbf{3})]\text{PF}_6$ ) solvent and added 100  $\mu\text{L}$  of  $\text{D}_2\text{O}$ . It was shaken well and the  $^1\text{H}$  NMR was measured.

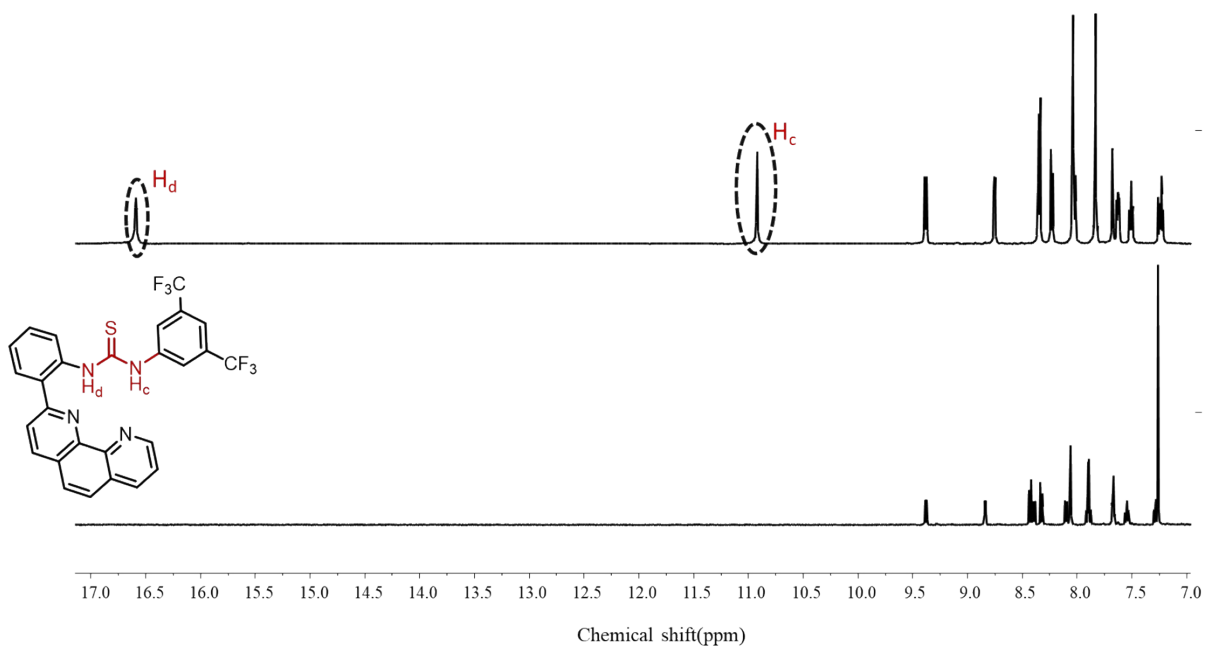

**Figure S 18:** Partial  $^1\text{H}$  NMR (500 MHz,  $\text{CDCl}_3$ , 298 K) spectra of a)  $\mathbf{1}$ ; b) after shaking with  $\text{D}_2\text{O}$

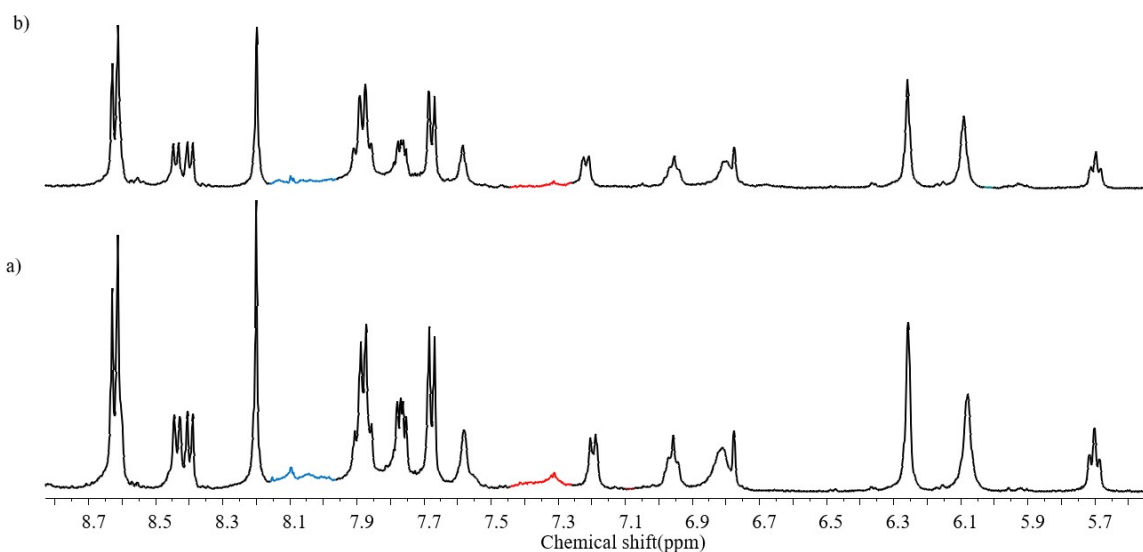

**Figure S 19:** Partial  $^1\text{H}$  NMR (500 MHz,  $\text{CD}_2\text{Cl}_2$ , 298 K) of a)  $[\text{Cu}(\mathbf{1})(\mathbf{3})]\text{PF}_6$ ; b) after shaking with  $\text{D}_2\text{O}$ .

#### 4. Metal induced reversible switching

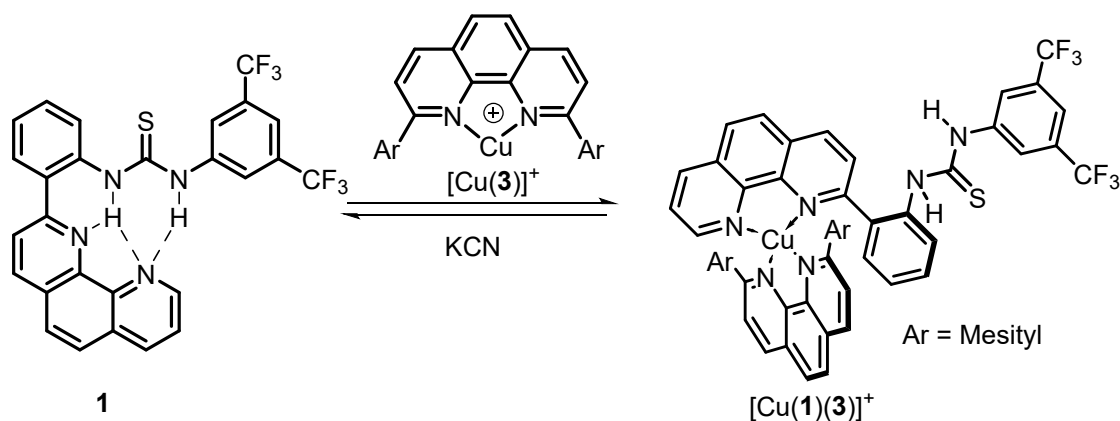

**Scheme S 2:** Schematic representation of reversible switching between two states of switch **1**. **1**, **3** and  $[\text{Cu}(\text{CH}_3\text{CN})_4\text{PF}_6]$  (1: 1: 1) were dissolved in 0.5 mL of  $\text{CD}_2\text{Cl}_2$  and  $^1\text{H}$  NMR was measured. 1 equivalent of KCN was added to the mixture. The solution was shaken well, colour turned pale yellow and  $^1\text{H}$  NMR was measured. Upon addition of one more equivalent of  $[\text{Cu}(\text{CH}_3\text{CN})_4(\text{PF}_6)]$  to the same mixture, red colour appears. The same procedure was continued for three times without observing any noticeable decomposition.

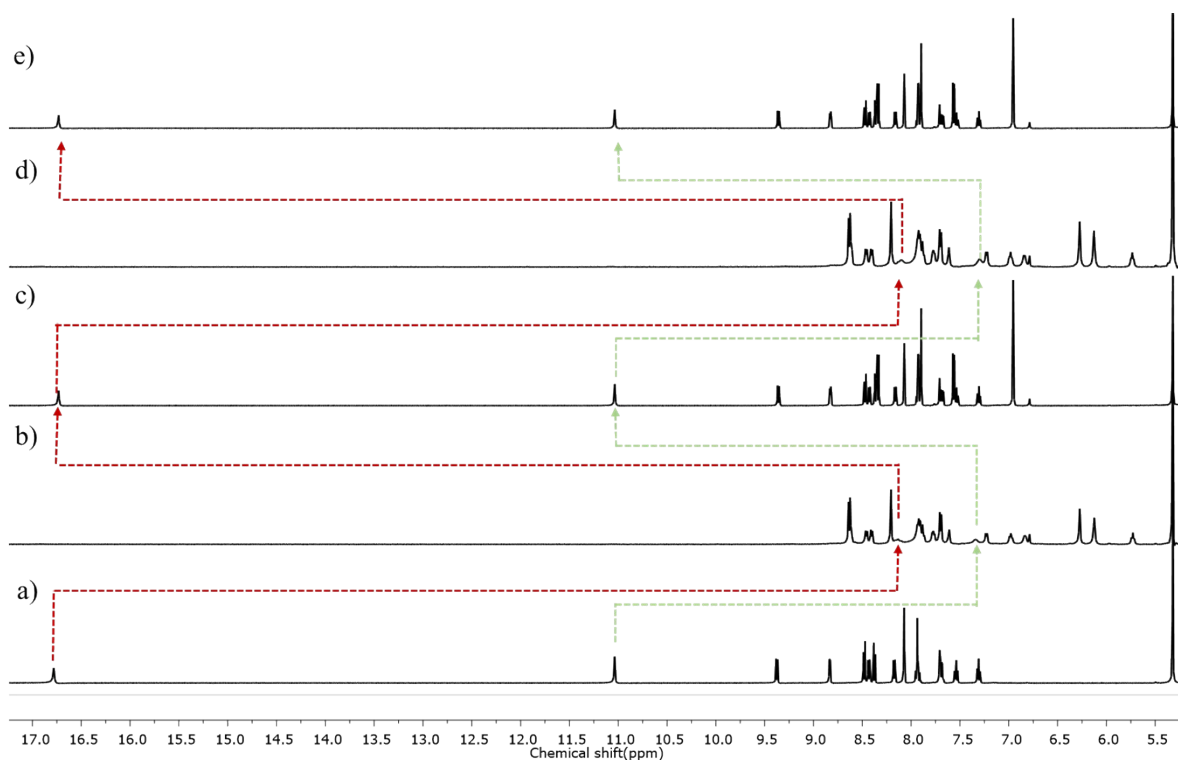

**Figure S 20:** Partial  $^1\text{H}$  NMR (500 MHz,  $\text{CD}_2\text{Cl}_2$ , 298 K) spectra of a) **1** (10 mM), b) after addition of one equivalent of  $[\text{Cu}(\text{CH}_3\text{CN})_4\text{PF}_6]$  and **3**; c) after addition of excess aqueous KCN to Cu complex followed by removal of water; d) after addition of  $[\text{Cu}(\text{CH}_3\text{CN})_4\text{PF}_6]$  to c; e) after addition of excess aqueous KCN to d and removal of water.

## 5. Concentration dependent $^1\text{H}$ NMR

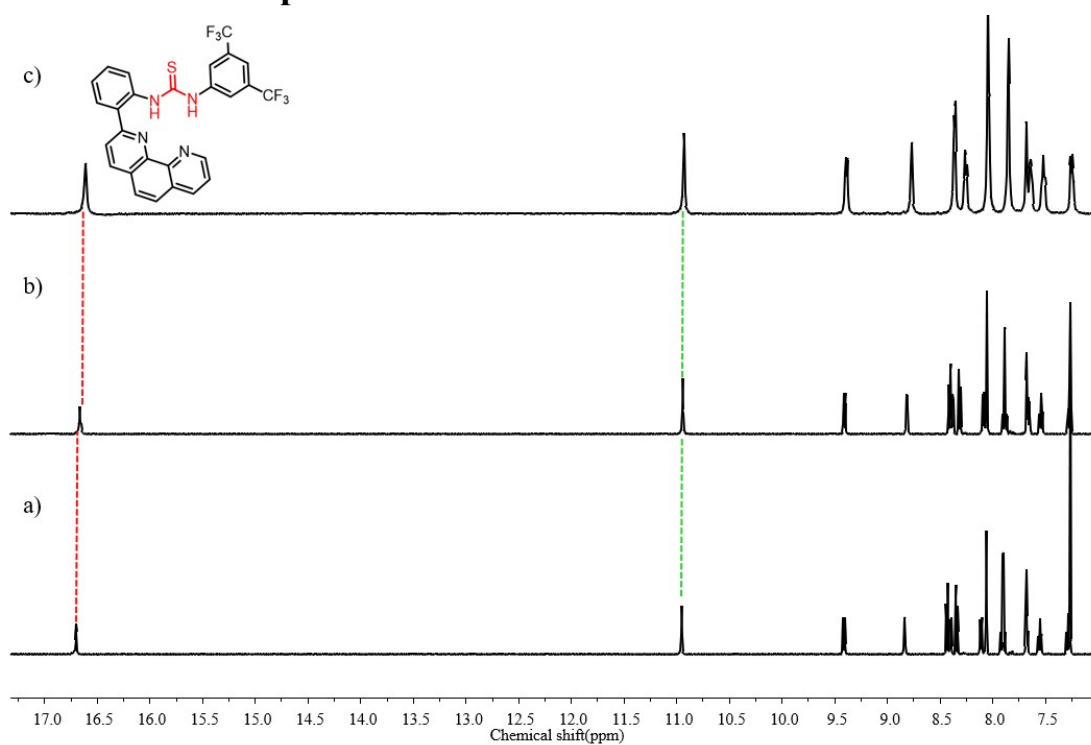

**Figure S 21:** Partial  $^1\text{H}$  NMR (500 MHz,  $\text{CDCl}_3$ , 298 K) spectra of **1** at a) 11 mM, b) 22 mM, c) 33 mM concentration.

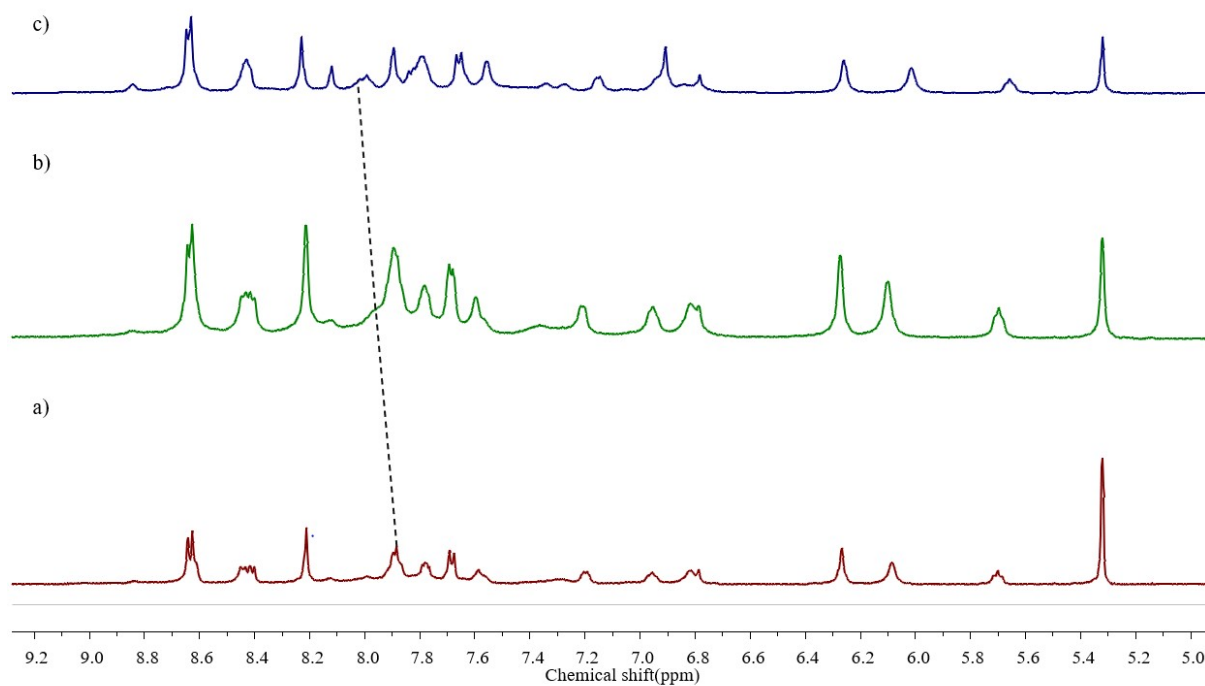

**Figure S 22:** Partial  $^1\text{H}$  NMR (500 MHz,  $\text{CD}_2\text{Cl}_2$ , 298 K) spectra of  $[\text{Cu}(\mathbf{1})(\mathbf{3})]\text{PF}_6$  at a) 11 mM, b) 22 mM, c) 33 mM concentration.



## 6. Comparison of UV-Visible spectra of **1** & [Cu (**1**)(**3**)] PF<sub>6</sub>

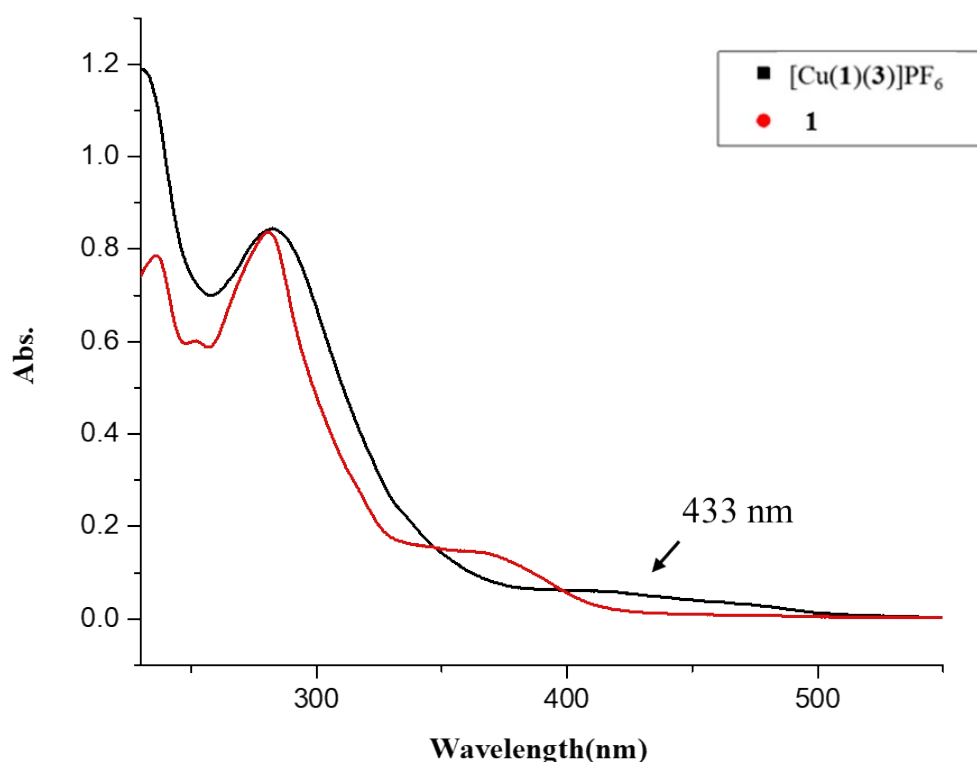

**Figure S 23:** UV-Visible spectra (CH<sub>2</sub>Cl<sub>2</sub>, 5 × 10<sup>-5</sup> M, 298 K) of **1** & [Cu (**1**)(**3**)] PF<sub>6</sub>

## 7. Catalytic studies

**1** (5.24 mg, 9.70 μmol), [Cu (CH<sub>3</sub>CN)<sub>4</sub>PF<sub>6</sub>] (3.62 mg, 9.70 μmol) and **3** (4.04 mg, 9.70 μmol) were dissolved in distilled 1,2-dichloromethane, stirred for one minute and dried under vacuum and used directly for catalytic studies.

### 7.1 Model reactions

#### 7.1.2 General procedure for model catalytic reactions

Beta-nitrostyrene (5 mg, 33.5 μmol), activemethylene compound (**5a/5b/5c/5d/5e**) (335 μmol), tetrachloroethelene (1.59 μL, 33.5 μmol), triethylamine (0.47 μL, 3.35 μmol) and **1** (1.82 mg, 3.35 μmol) were dissolved in CDCl<sub>3</sub> (0.5 mL) in an NMR tube and monitored the reaction by measuring <sup>1</sup>H NMR at room temperature at specified time.

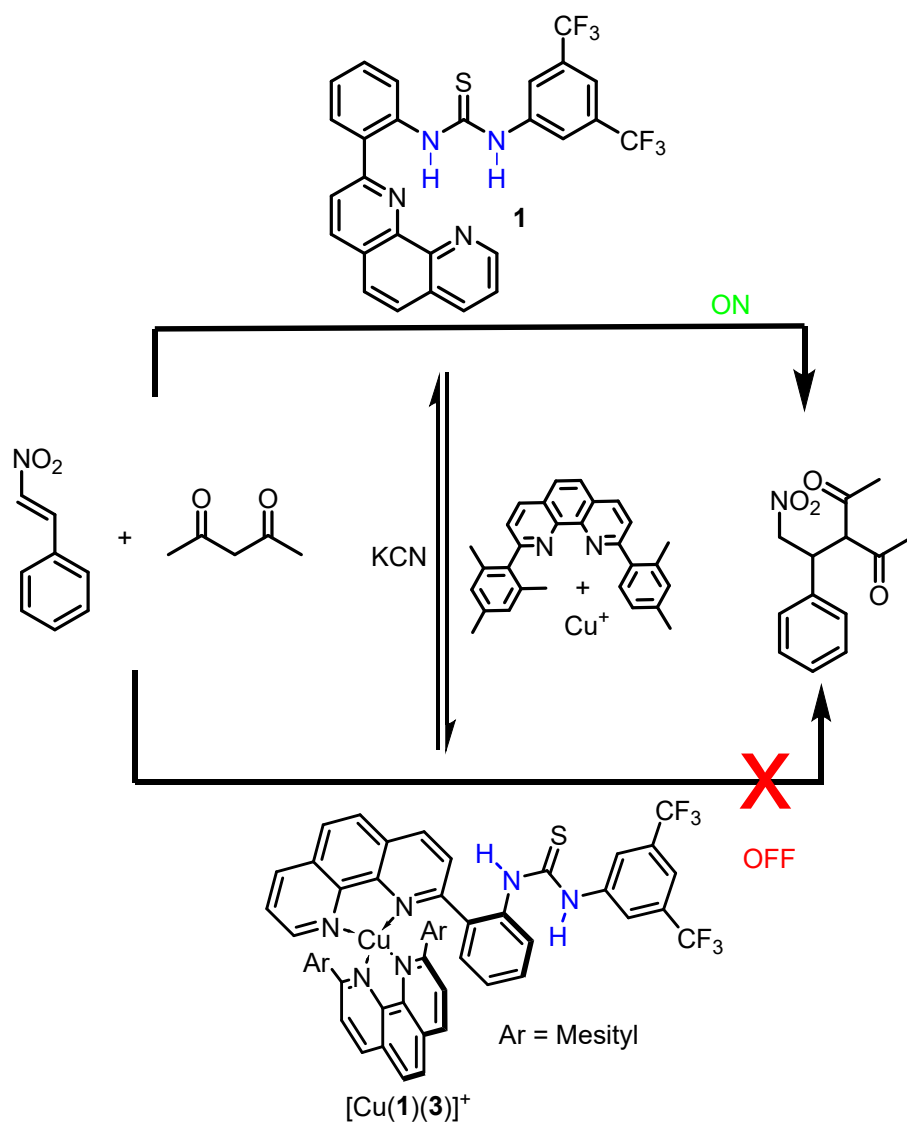

**Scheme S 3:** Schematic representation of  $\text{Cu}^+$  induced ON/OFF catalysis.

Model reaction 1:

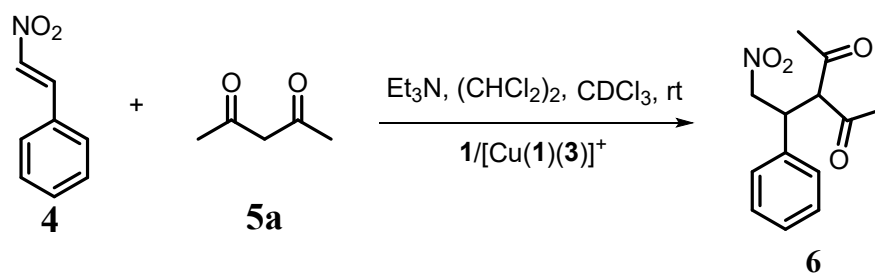

Model reaction 2:

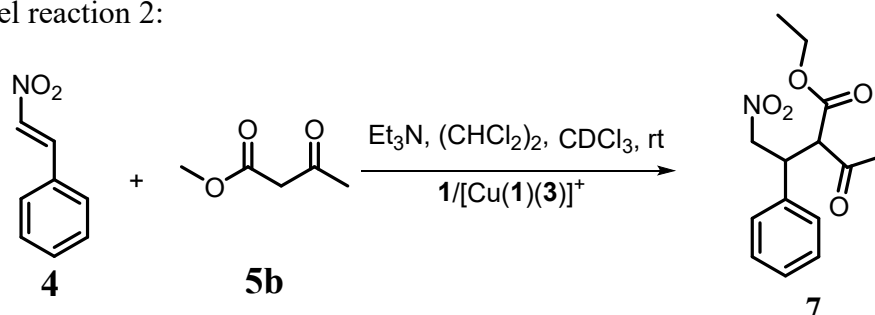

Model reaction 3:

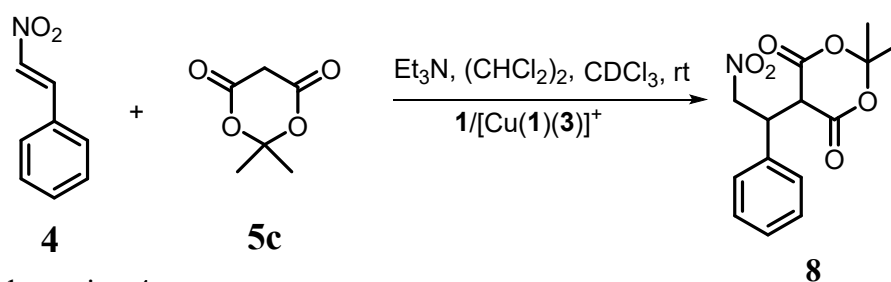

Model reaction 4:

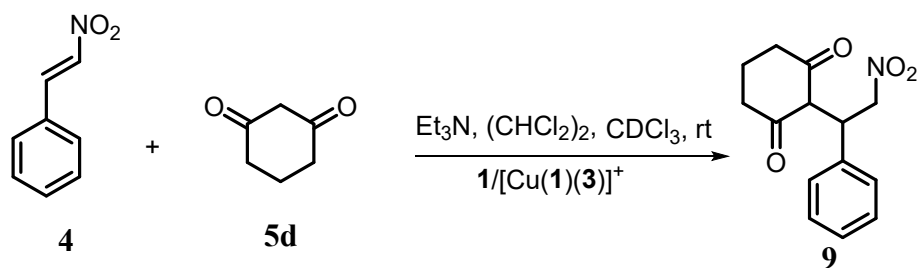

Model reaction 5:

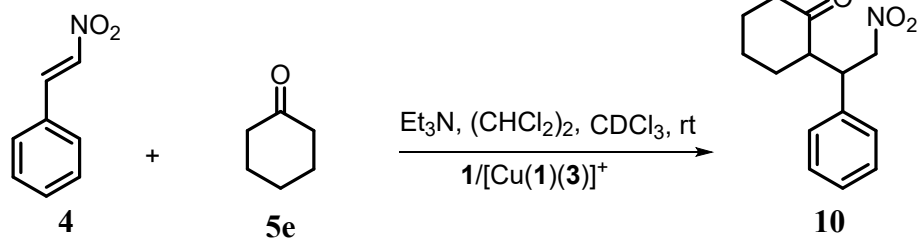

**Scheme S 4:** Model reactions used in ON/OFF catalysis

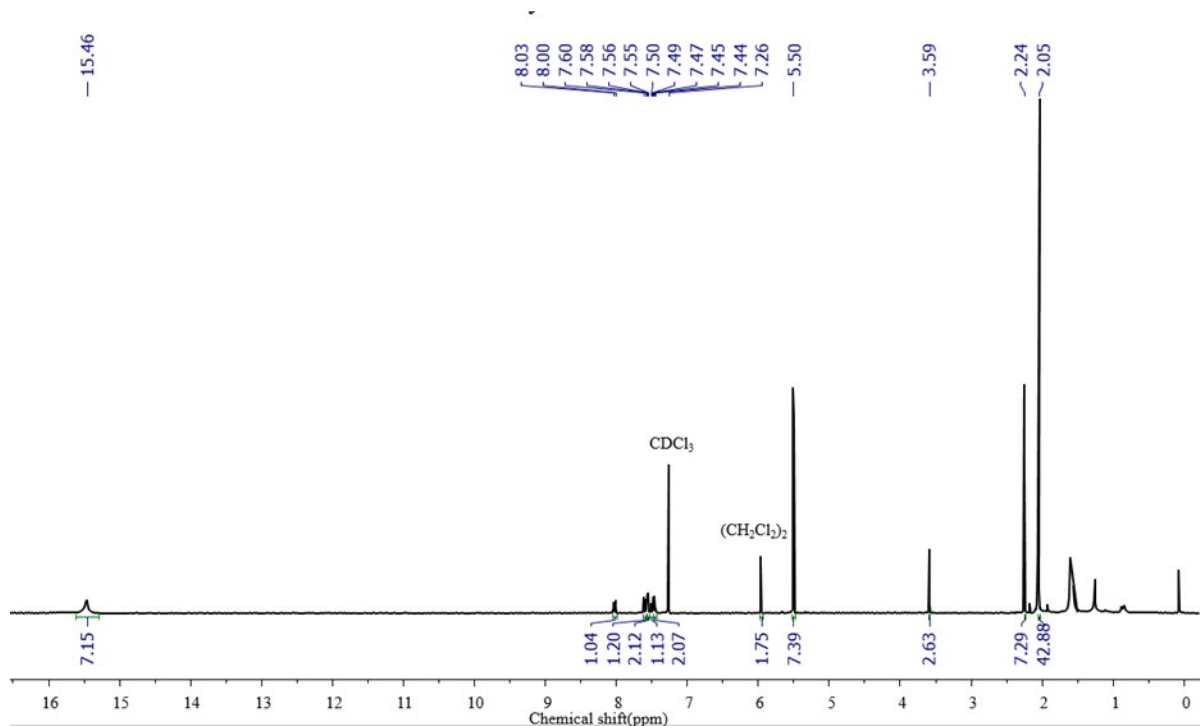

**Figure S 24:**  $^1\text{H}$  NMR (500 MHz,  $\text{CDCl}_3$ , 298 K) spectrum of model catalytic reaction 1 in the absence of switch 1.

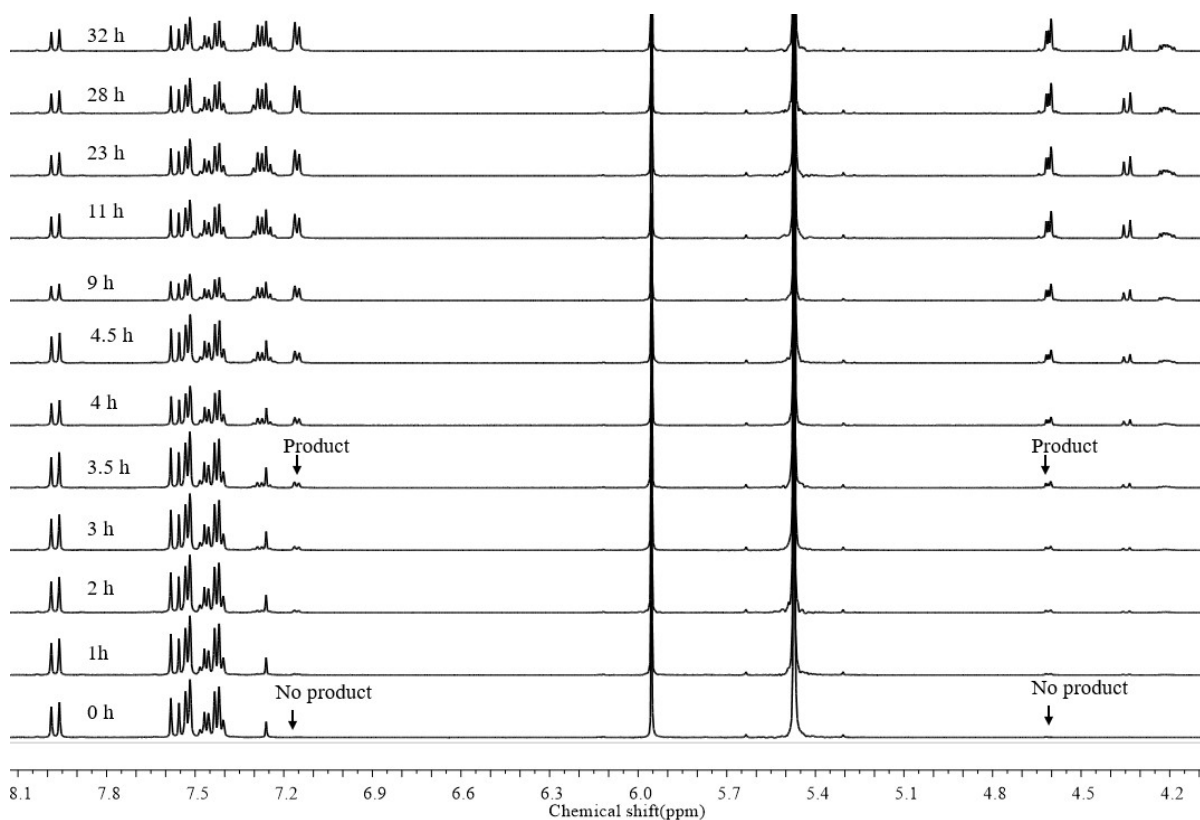

**Figure S 25:** Time profile  $^1\text{H}$  NMR (500 MHz,  $\text{CDCl}_3$ , 298 K) spectra of model reaction 1 in the presence of 5 mol% switch 1.

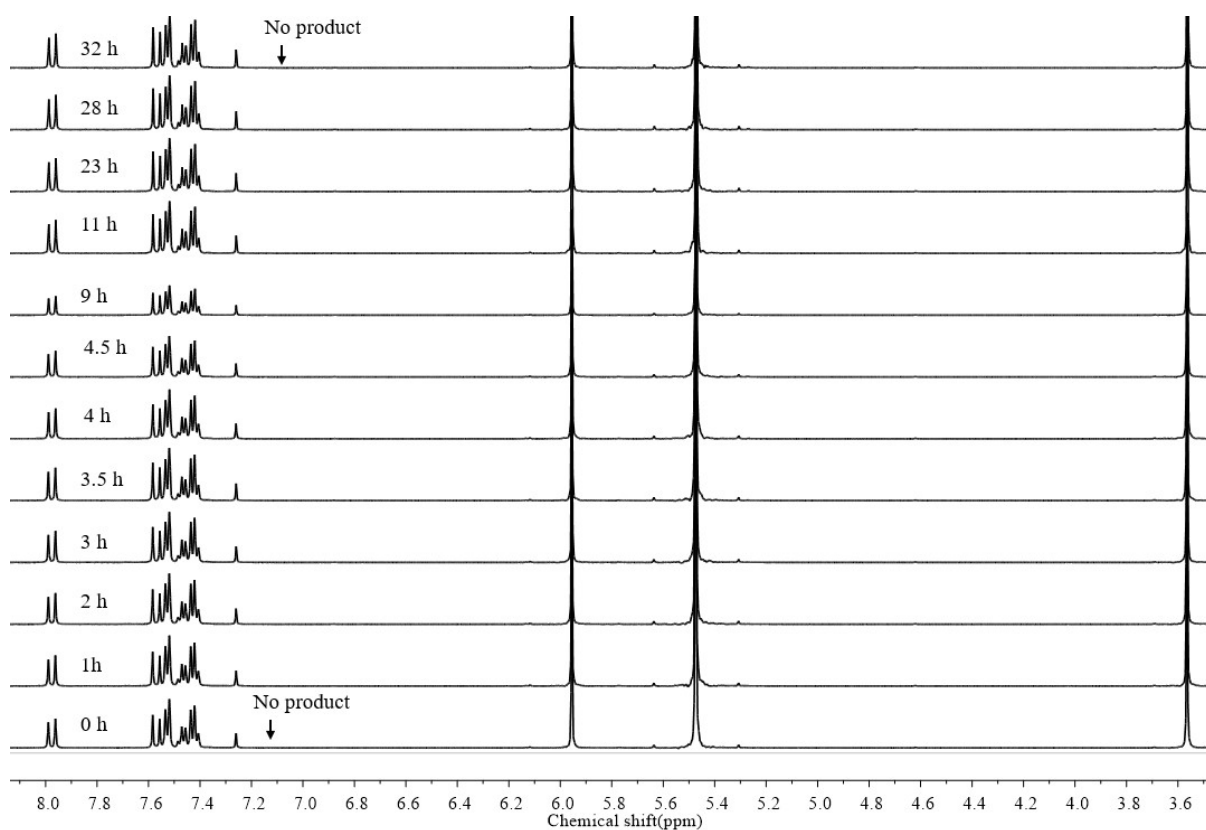

**Figure S 26:** Time profile  $^1\text{H}$  NMR (500 MHz,  $\text{CDCl}_3$ , 298 K) spectra of model reactions in the presence of  $[\text{Cu}(\mathbf{1})(\mathbf{3})]\text{PF}_6$ .

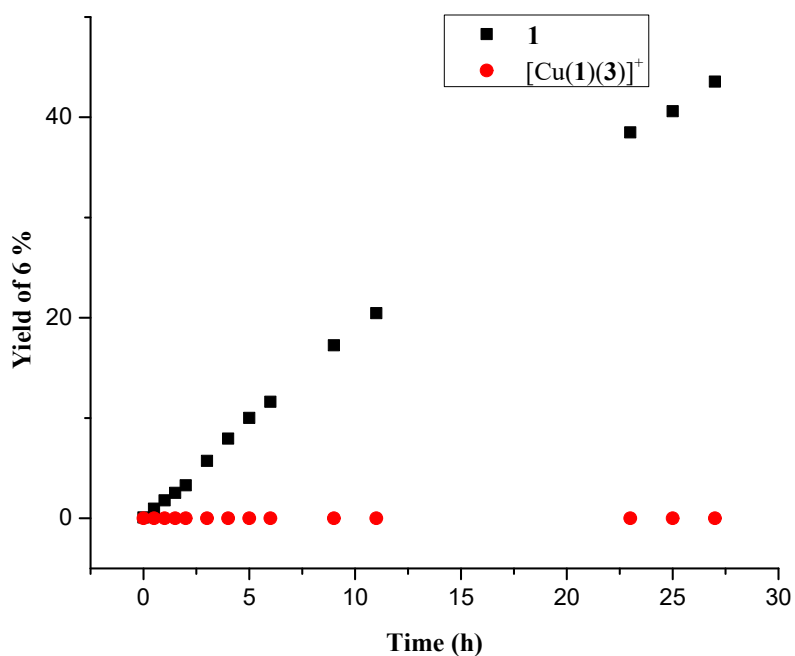

**Figure S 27:** Comparison for the product formation with switch **1** (5 mol%) (black) and with  $[\text{Cu}(\mathbf{1})(\mathbf{3})]\text{PF}_6$  (red) (5 mol%).

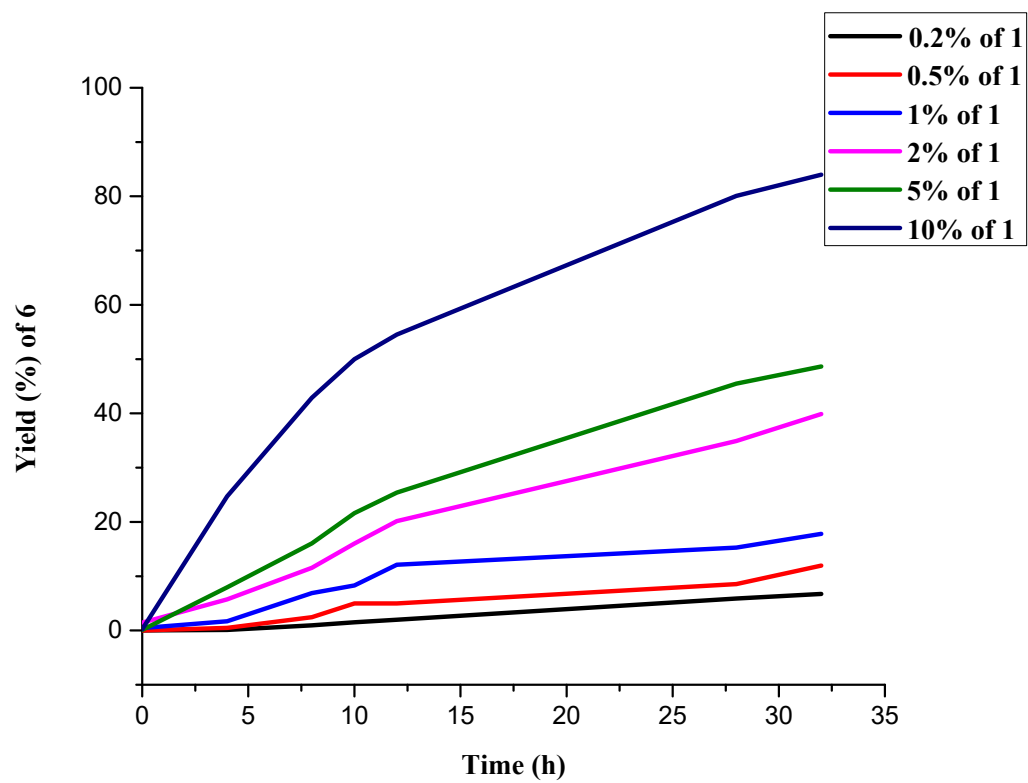

**Figure S 28:** Comparison for the product formation with different mol% of switch 1.

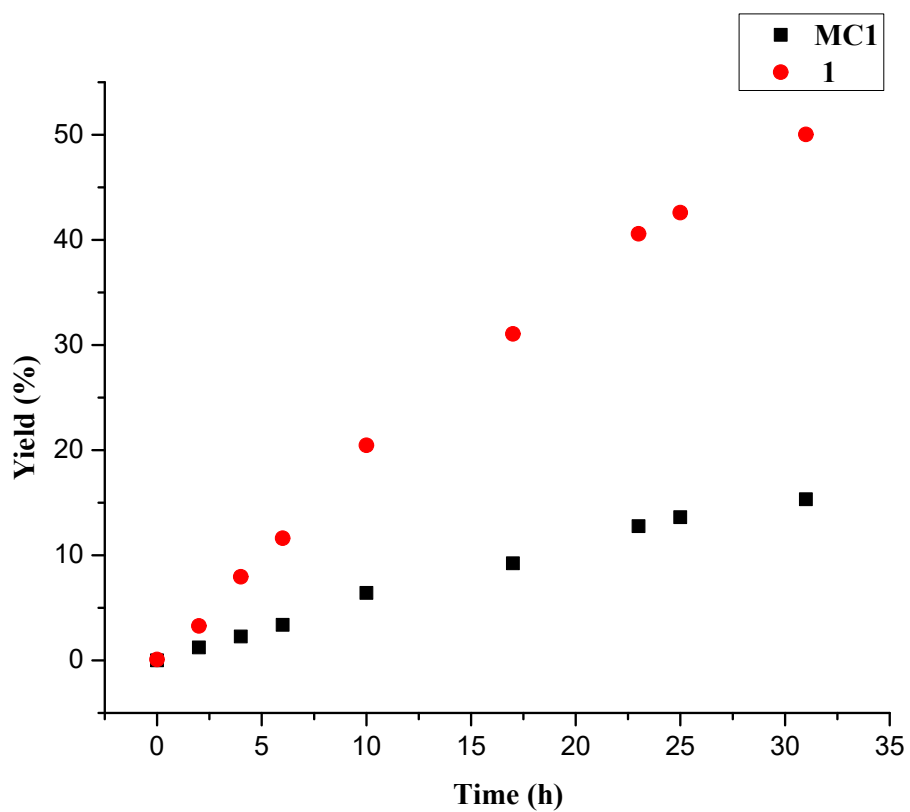

**Figure S 29:** Comparison for the product formation for model reaction 1 with the switch **1** (5 mol%) (red) and with (5 mol%) model catalyst1 (**1a**) (black).

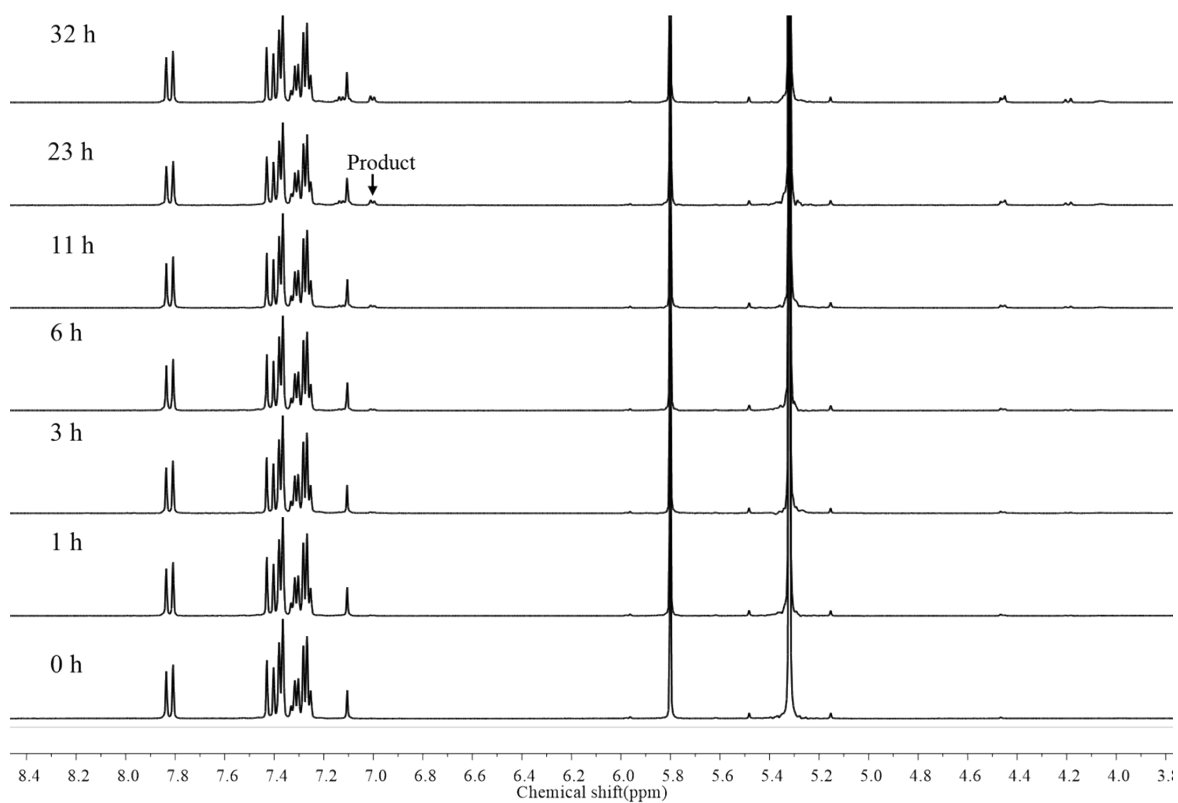

**Figure S 30:** Time profile  $^1\text{H}$  NMR (500 MHz,  $\text{CDCl}_3$ , 298 K) spectra of model reaction 1 in the presence of 5 mol% **1a**.

Model reaction 2

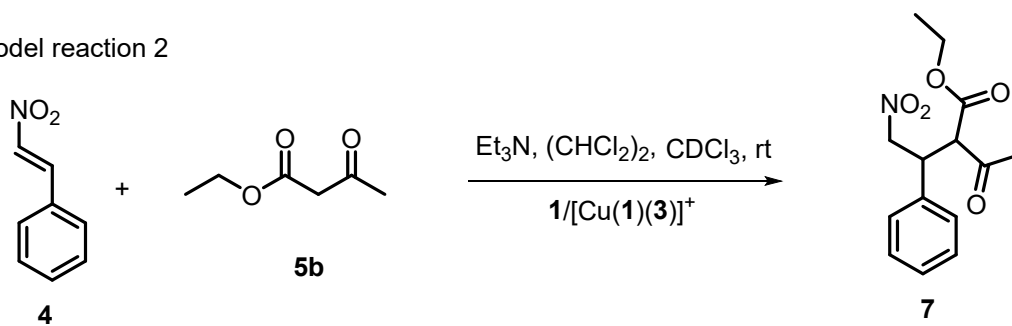



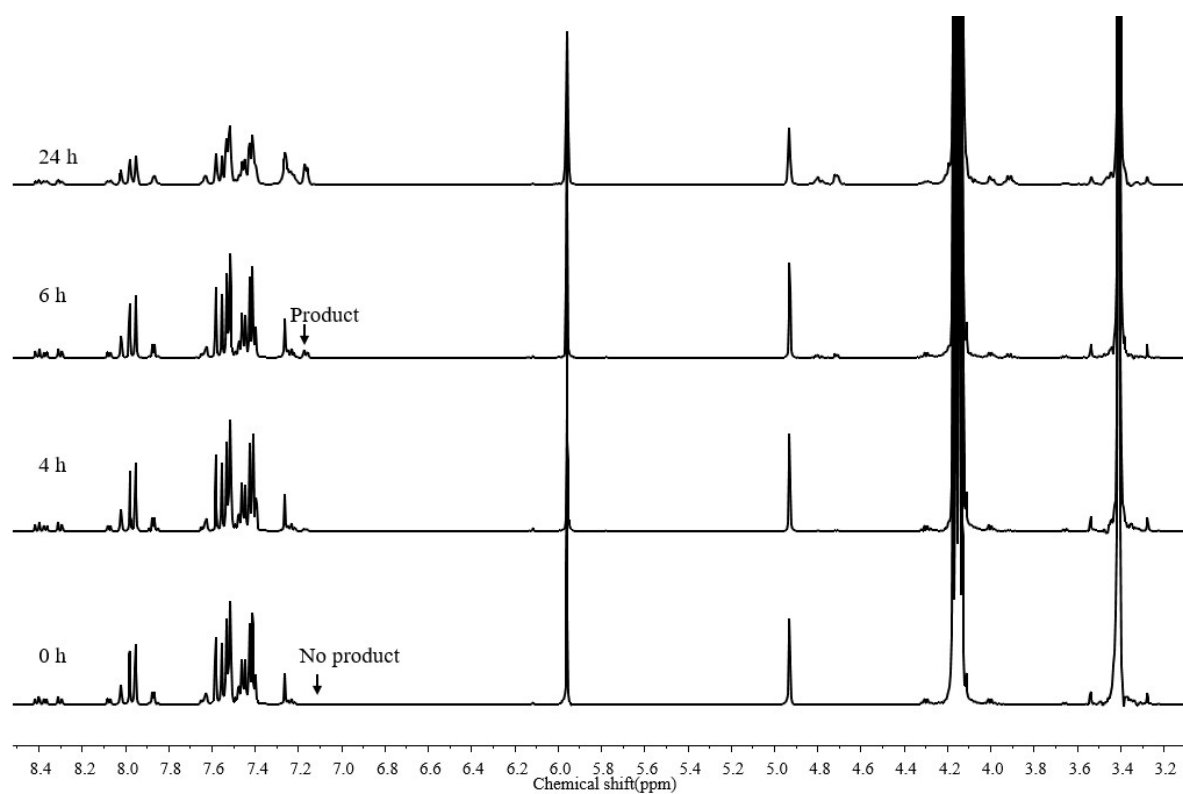

**Figure S 31:** Time profile  $^1\text{H}$  NMR (500 MHz,  $\text{CDCl}_3$ , 298 K) spectra of model reaction 2 in the presence of one mol% **1**.

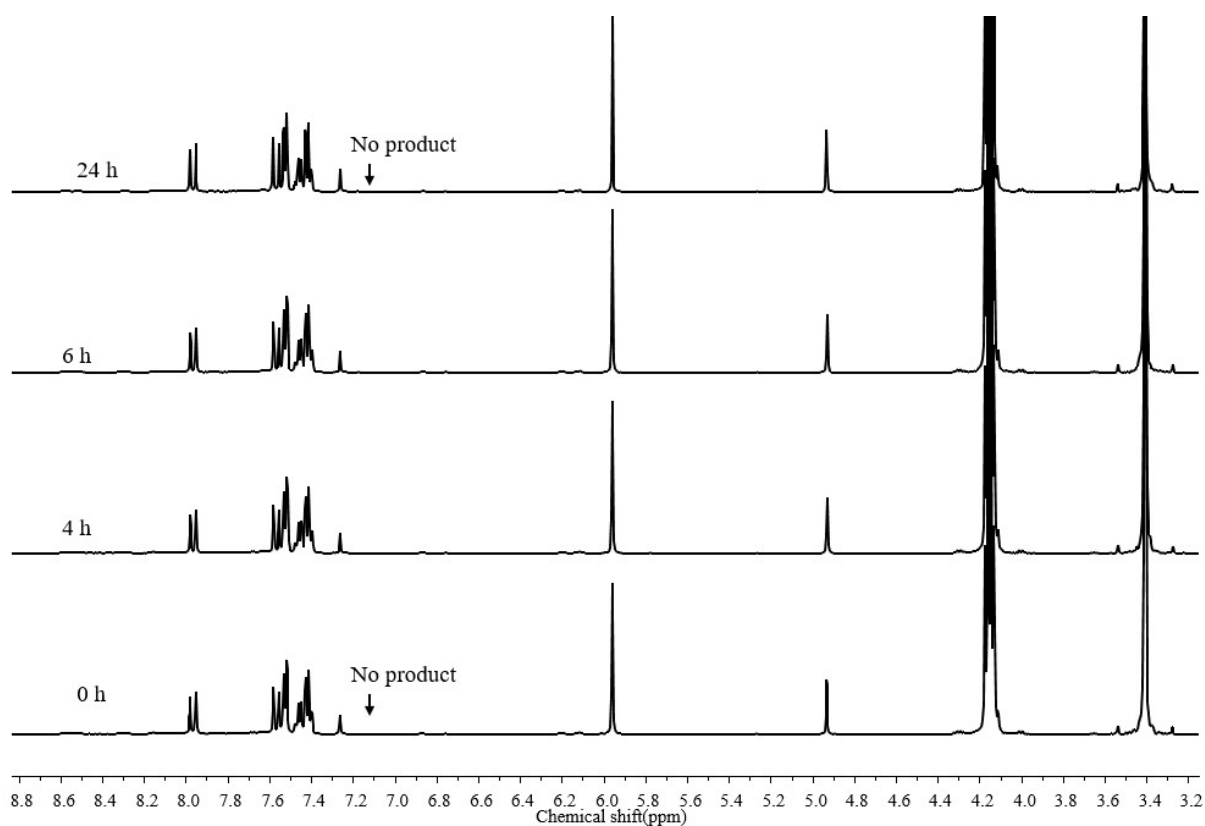

**Figure S 32:** Time profile  $^1\text{H}$  NMR (500 MHz,  $\text{CDCl}_3$ , 298 K) spectra of model reaction 2 in the presence of one mol%  $[\text{Cu}(\mathbf{1})(\mathbf{3})]\text{PF}_6$ .

Model reaction 3:

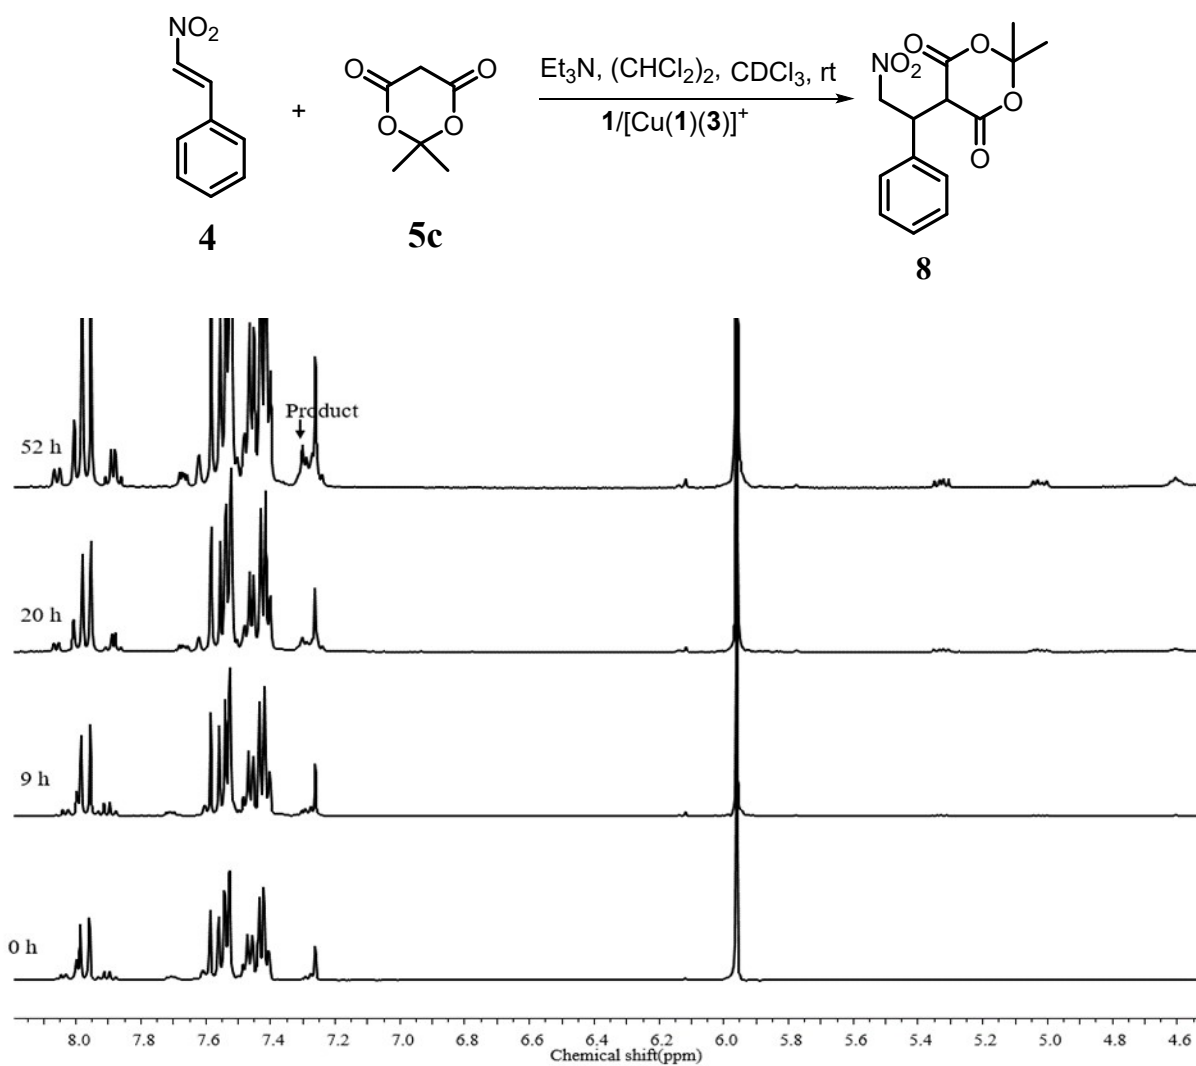

**Figure S 33:** Time profile <sup>1</sup>H NMR (500 MHz, CDCl<sub>3</sub>, 298 K) spectra of model reaction 3 in the presence of one mol% **1**.

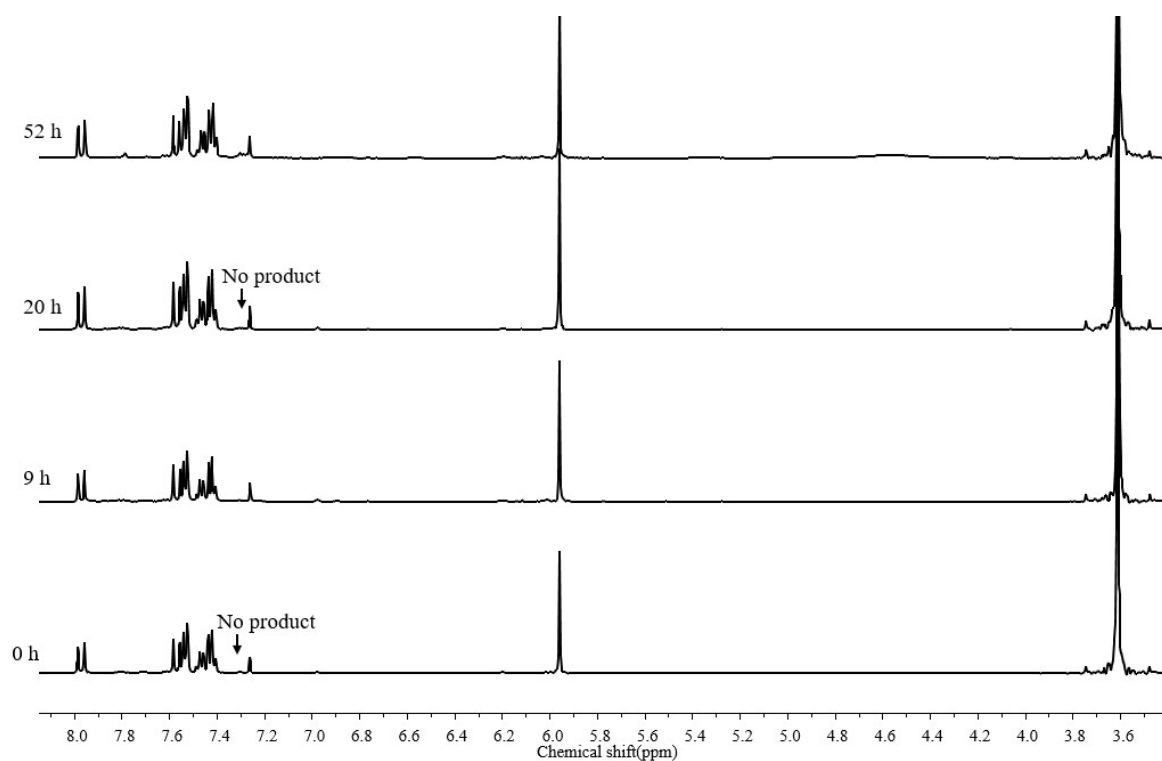

**Figure S 34:** Time profile  $^1\text{H}$  NMR (500 MHz,  $\text{CDCl}_3$ , 298 K) spectra of model reaction 3 in the presence of one mol%  $[\text{Cu}(\mathbf{1})(\mathbf{3})]\text{PF}_6$ .

Model reaction 4:

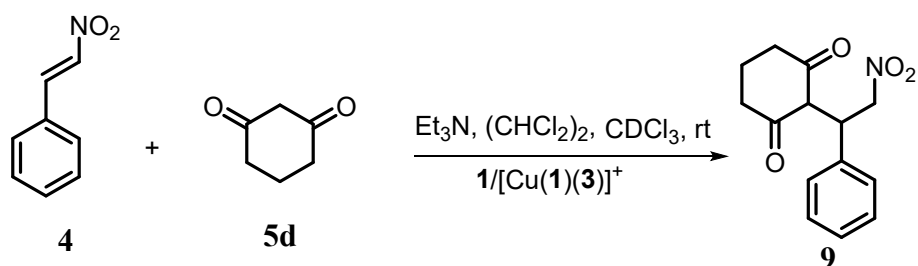

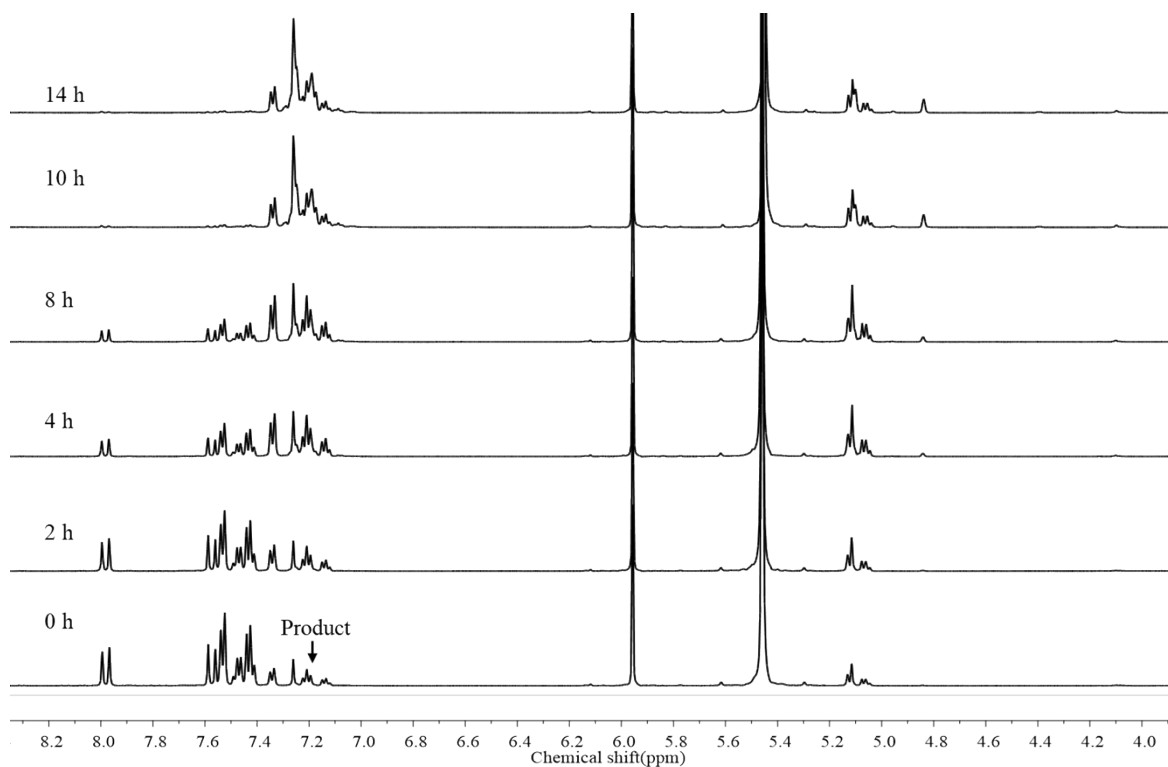

**Figure S 35:** Time profile  $^1\text{H}$  NMR (500 MHz,  $\text{CDCl}_3$ , 298 K) spectra of model reaction 4 in the presence of one mol% **1**.

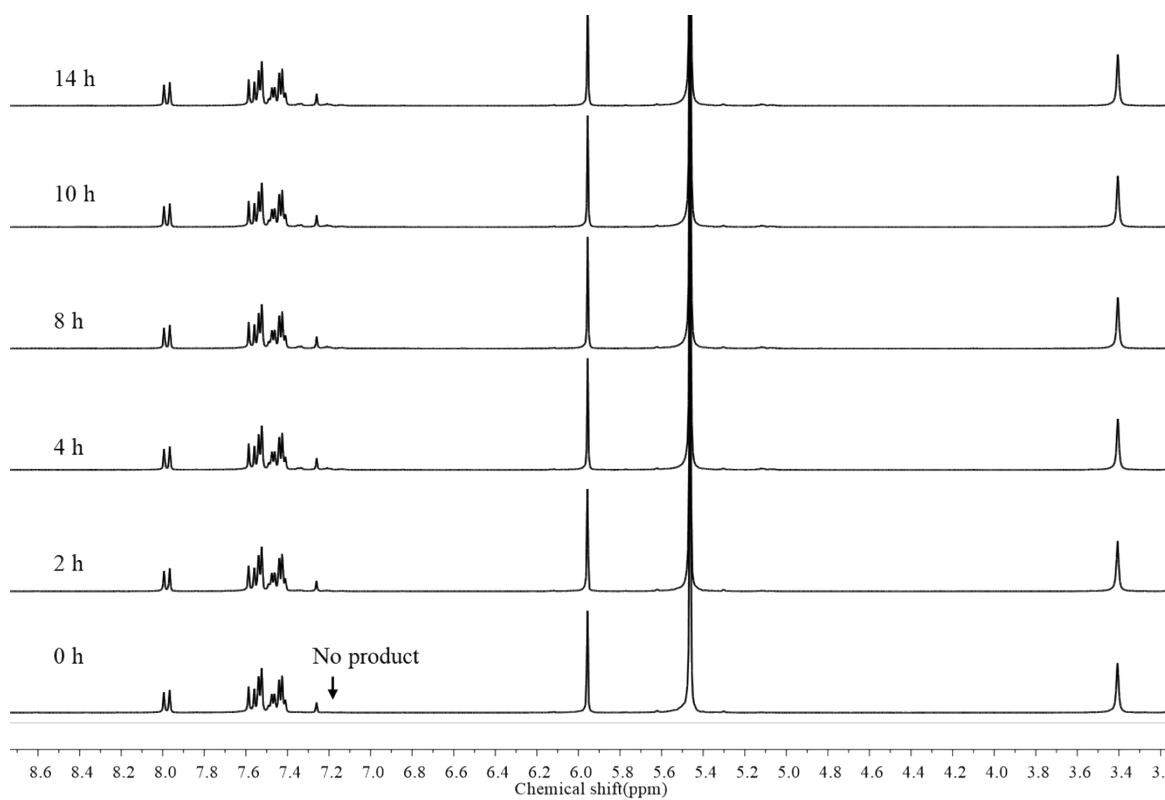

**Figure S 36:** Time profile  $^1\text{H}$  NMR (500 MHz,  $\text{CDCl}_3$ , 298 K) spectra of model reaction 4 in the presence of one mol%  $[\text{Cu}(\mathbf{1})(\mathbf{3})]\text{PF}_6$ .

Model reaction 5:

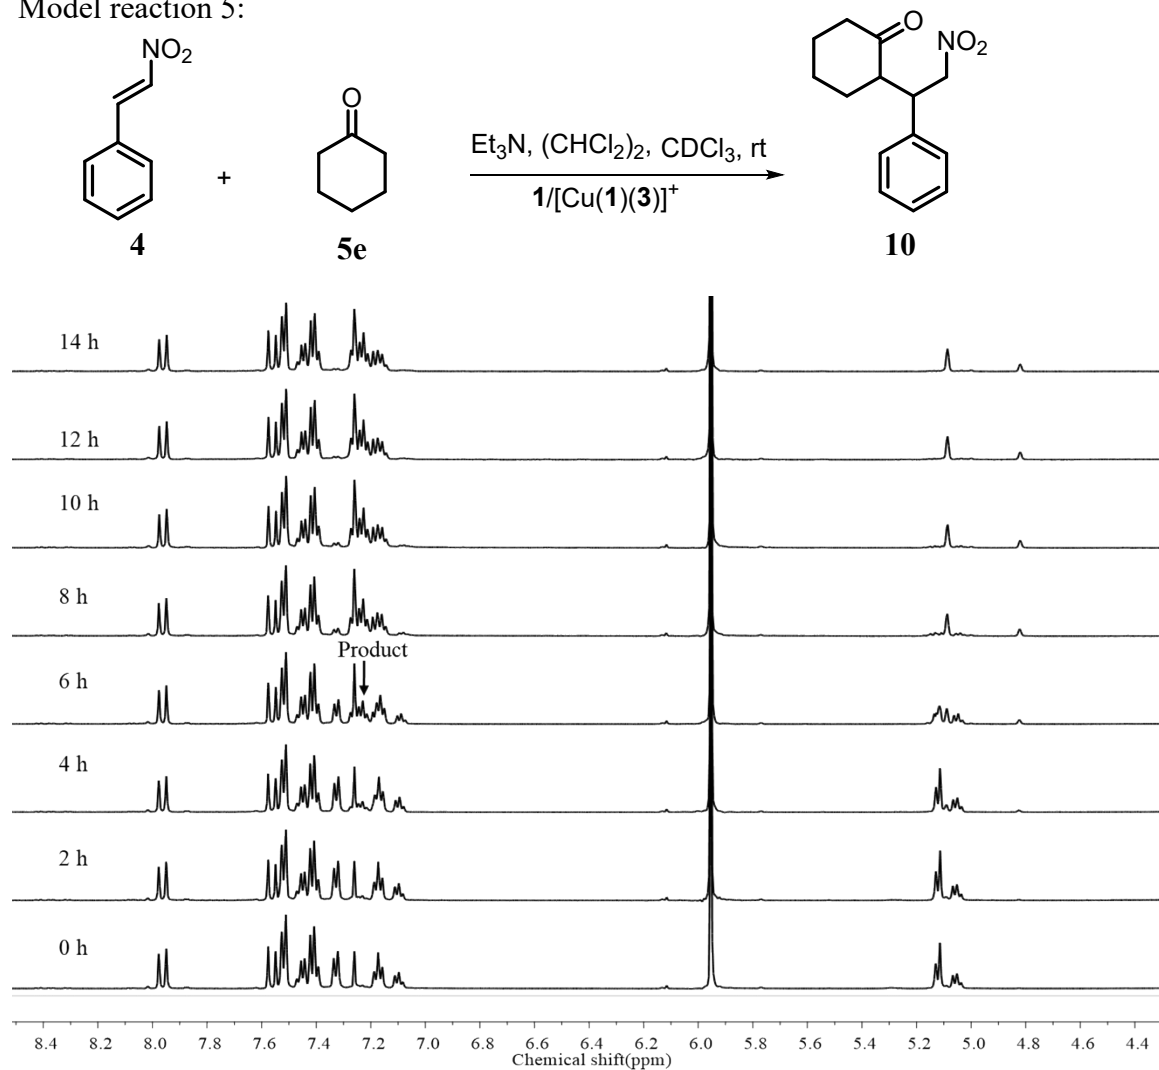

**Figure S 37:** Time profile <sup>1</sup>H NMR (500 MHz, CDCl<sub>3</sub>, 298 K) spectra of model reaction 5 in the presence of one mol% **1**.

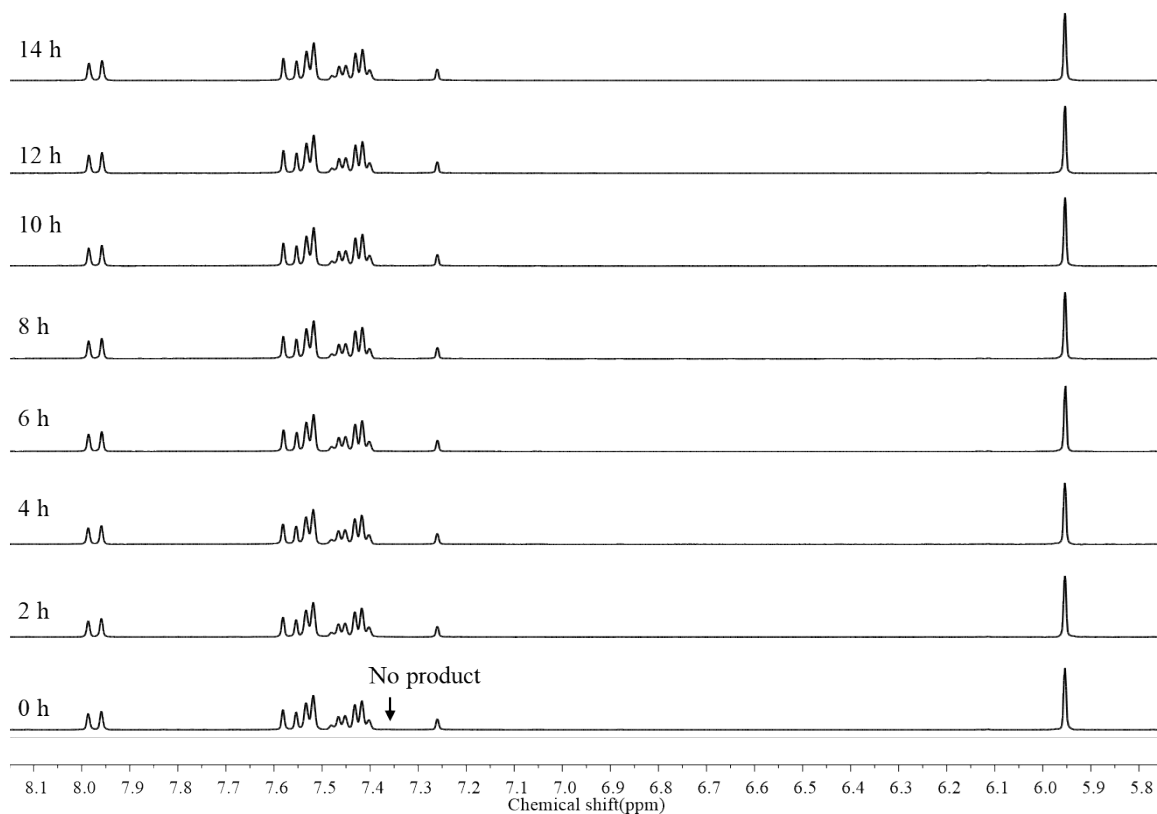

**Figure S 38:** Time profile  $^1\text{H}$  NMR (500 MHz,  $\text{CDCl}_3$ , 298 K) spectra of model reaction 5 in the presence of one mol%  $[\text{Cu}(\mathbf{1})(\mathbf{3})]\text{PF}_6$ .

## 7.2 In situ changes in the yield of the reaction by alternating switching between two states

Model reaction 1:

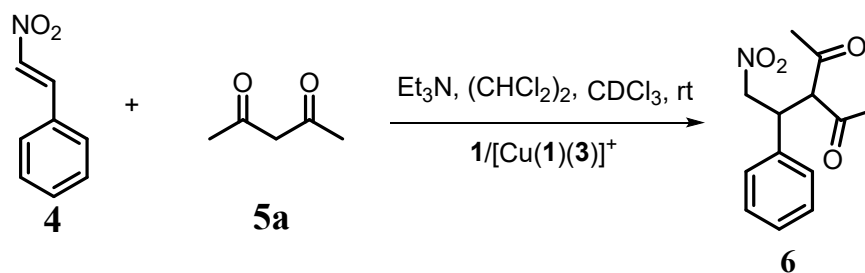

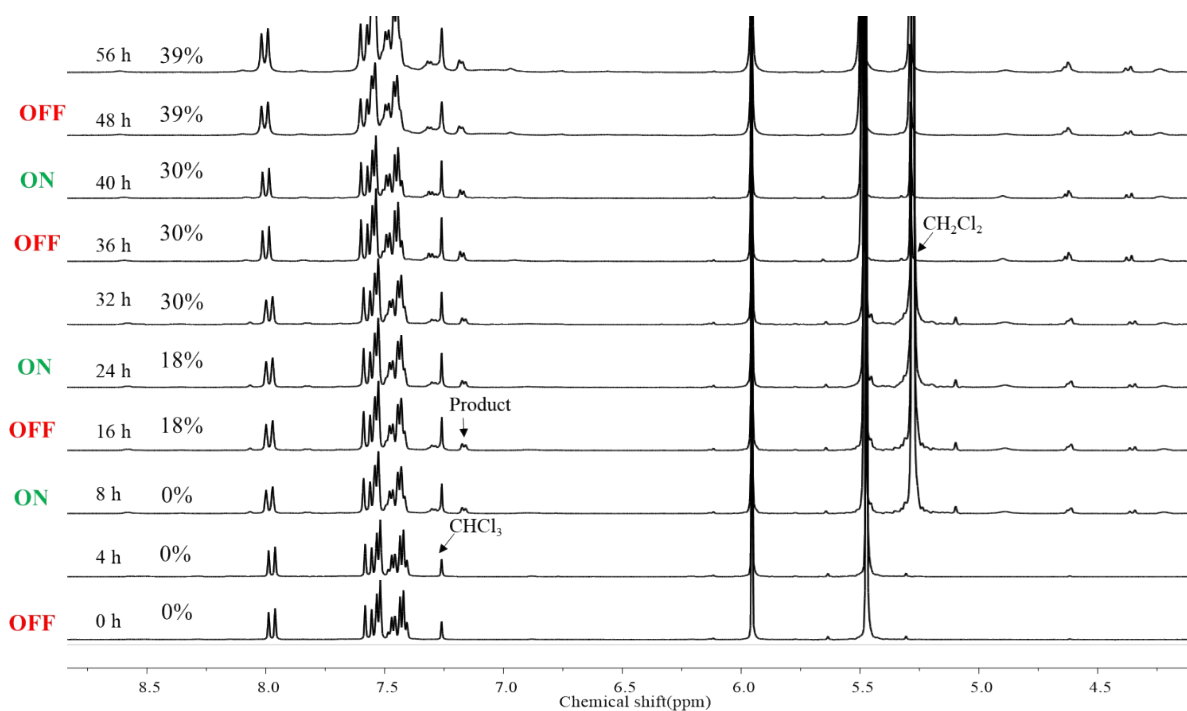

**Figure S 39:** Evolution of <sup>1</sup>H NMR for the catalytic reaction 1 with 5 mol% [Cu (1)(3)]PF<sub>6</sub> (0 to 8h, OFF state); upon addition of excess aqueous KCN to [Cu (1)(3)]PF<sub>6</sub> followed by drying and keeping the reaction for 8 h (8 h to 16 h, ON state); further addition of one equivalent of [Cu(CH<sub>3</sub>CN)<sub>4</sub>]PF<sub>6</sub> to the above mixture (16 h to 24 h, OFF state); again washing with aqueous KCN followed by drying and keeping the reaction for 8 h (24 h to 32 h, ON state); addition of one equivalent of one equivalent of [Cu(CH<sub>3</sub>CN)<sub>4</sub>]PF<sub>6</sub> (32 h to 40 h, OFF state); again washing with aqueous KCN followed by drying and keeping the reaction for 8 h (40 h to 48 h, ON state); further OFF state was generated by addition of one equivalent of [Cu(CH<sub>3</sub>CN)<sub>4</sub>]PF<sub>6</sub> (48 h to 56 h, OFF state). In each successive ON cycle conversion decreases due to loss of some amounts of catalyst during work-up and drying after treatment with aqueous KCN.

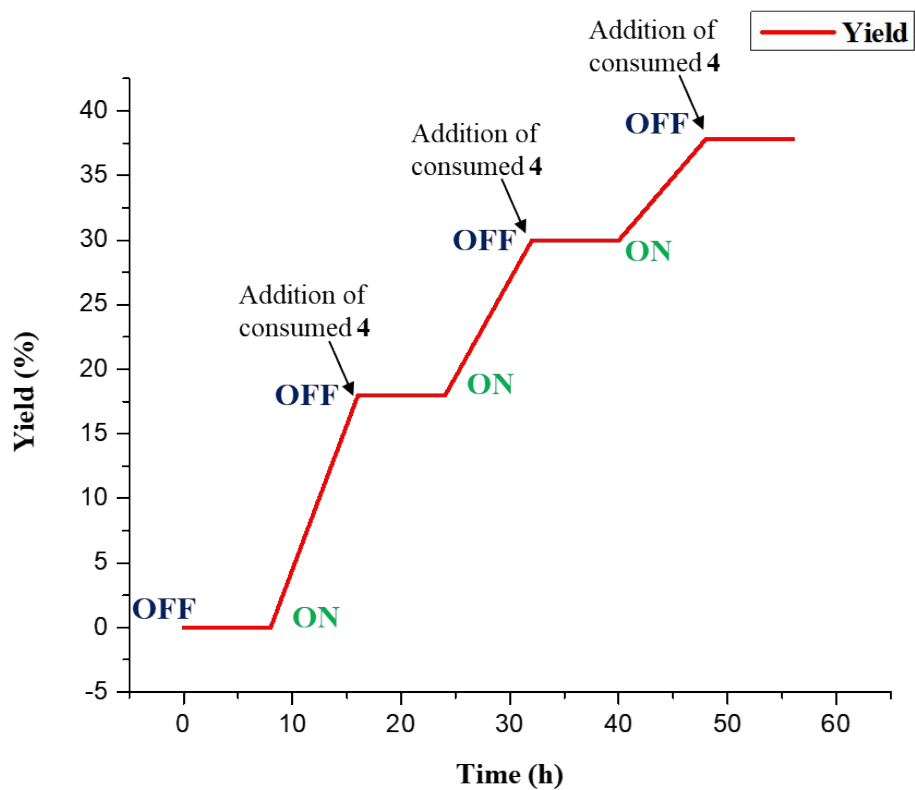

**Figure S 40:** Graph showing changes in the yield on OFF-ON-OFF switching

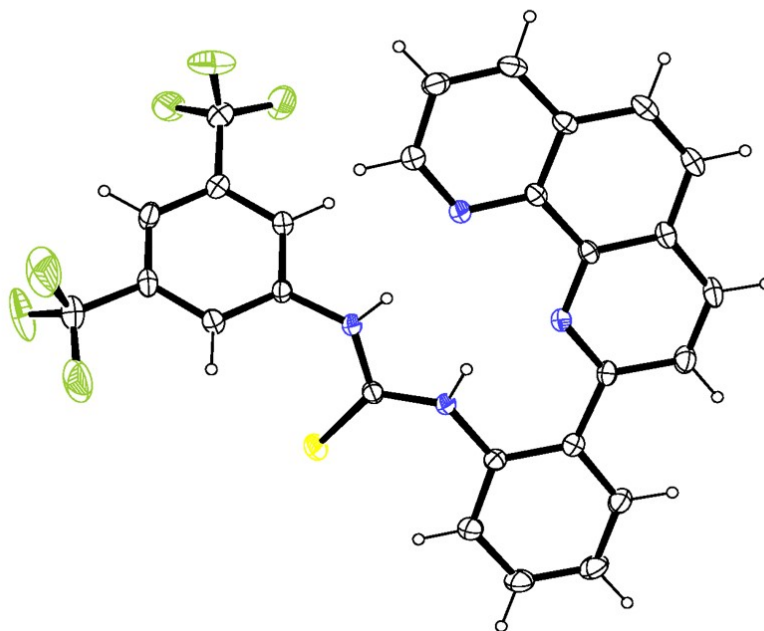

**Figure S 41:** Single crystal XRD structure for **1**(anti-anti conformation)



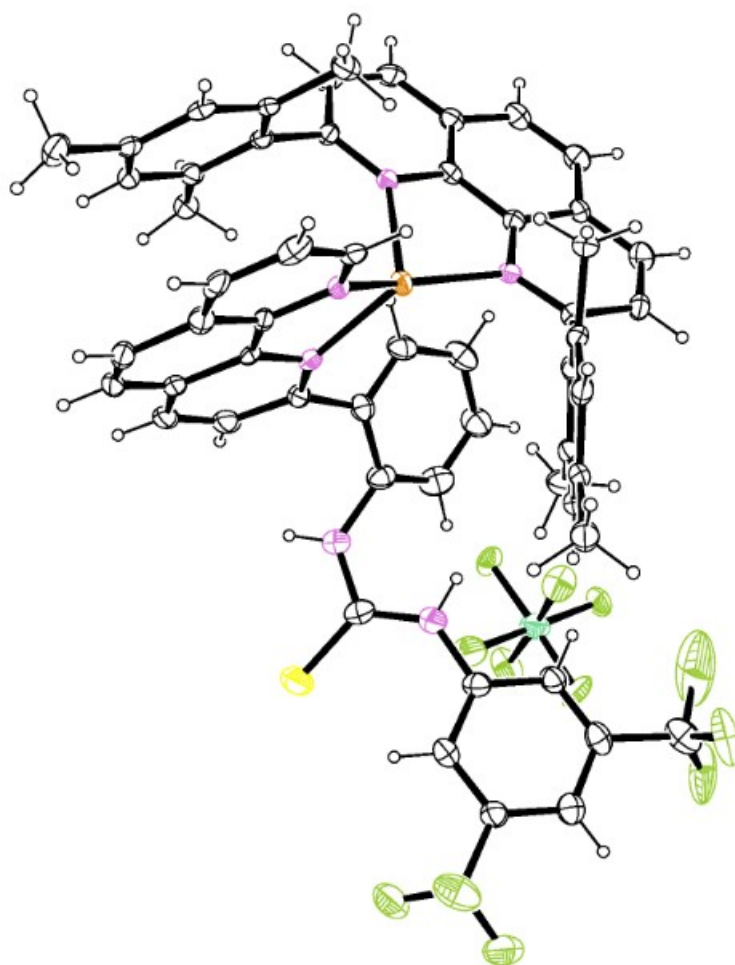

**Figure S 42:** Single crystal XRD structure for [Cu (1)(3)]<sup>+</sup> (syn-anti conformation)

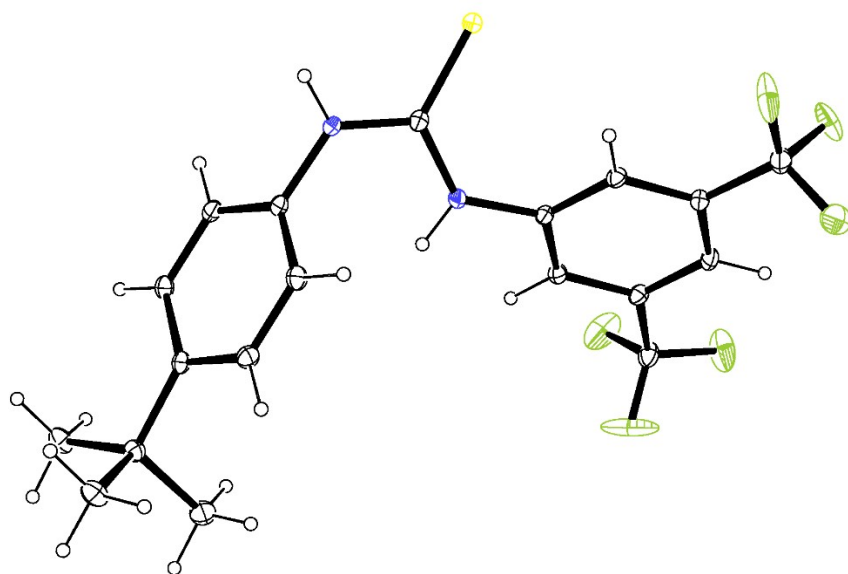

**Figure S 43:** Single crystal XRD structure for **1a** (syn-anti conformation).

### 9. Geometry optimised structures of $[\text{Cu}(\mathbf{1})(\mathbf{3})]^+$ :

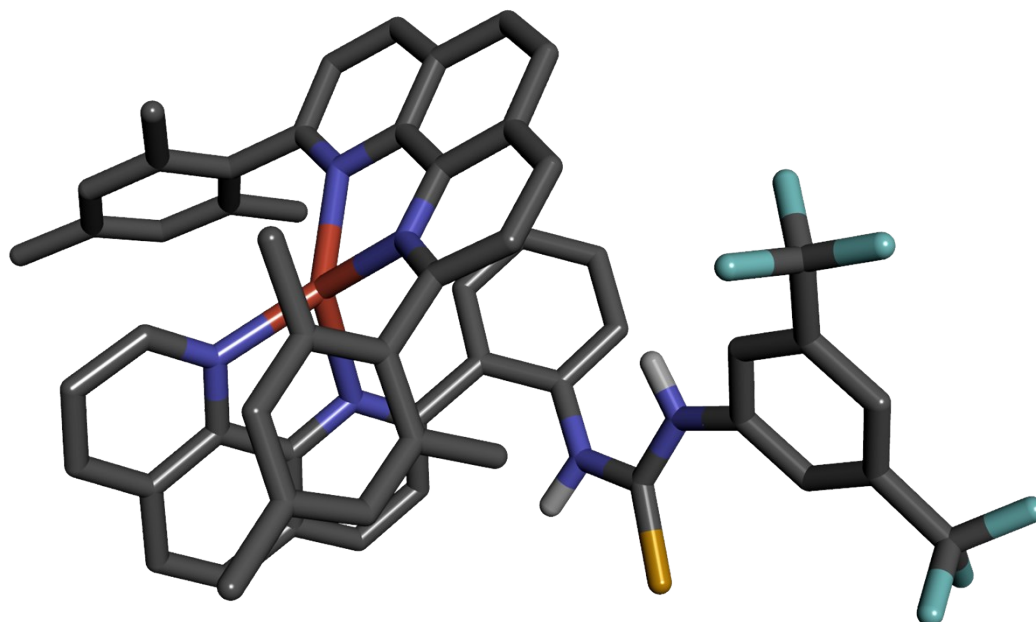

**Figure S1:** Geometry optimized structure of syn-anti conformation of  $[\text{Cu}(\mathbf{1})(\mathbf{3})]^+$  at 6-311G(d, p) basis set on C,H,N,F,S and the LANL2DZ ECP basis set on Cu.

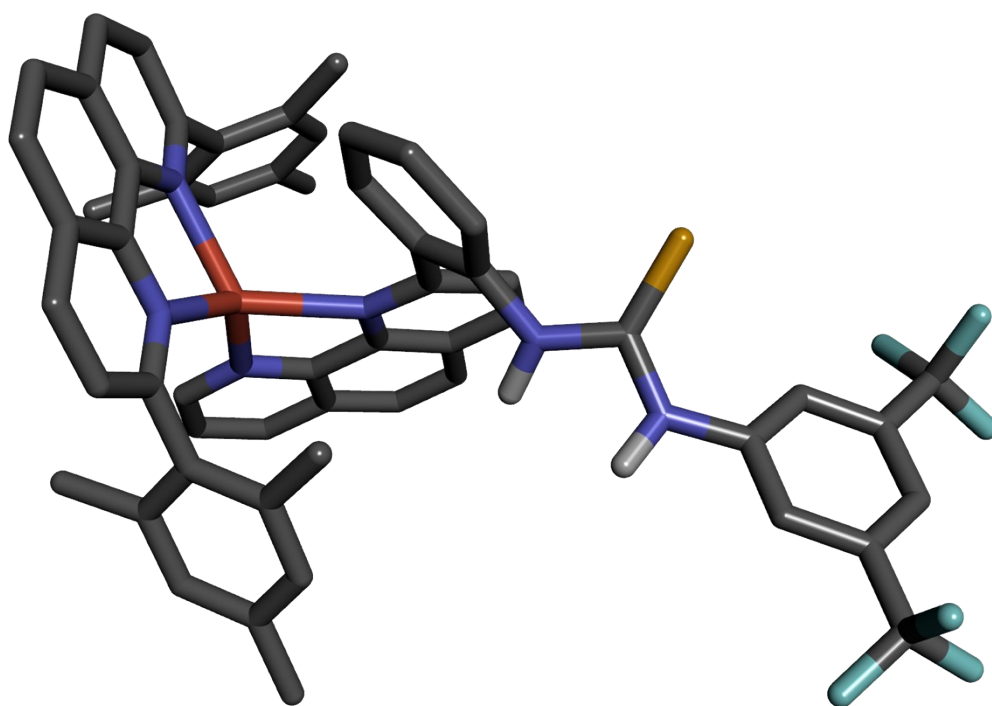

**Figure S2:** Geometry optimized structure of anti-anti conformation of  $[\text{Cu}(\mathbf{1})(\mathbf{3})]^+$  at 6-311G(d, p) basis set on C,H,N,F,S and the LANL2DZ ECP basis set on Cu.

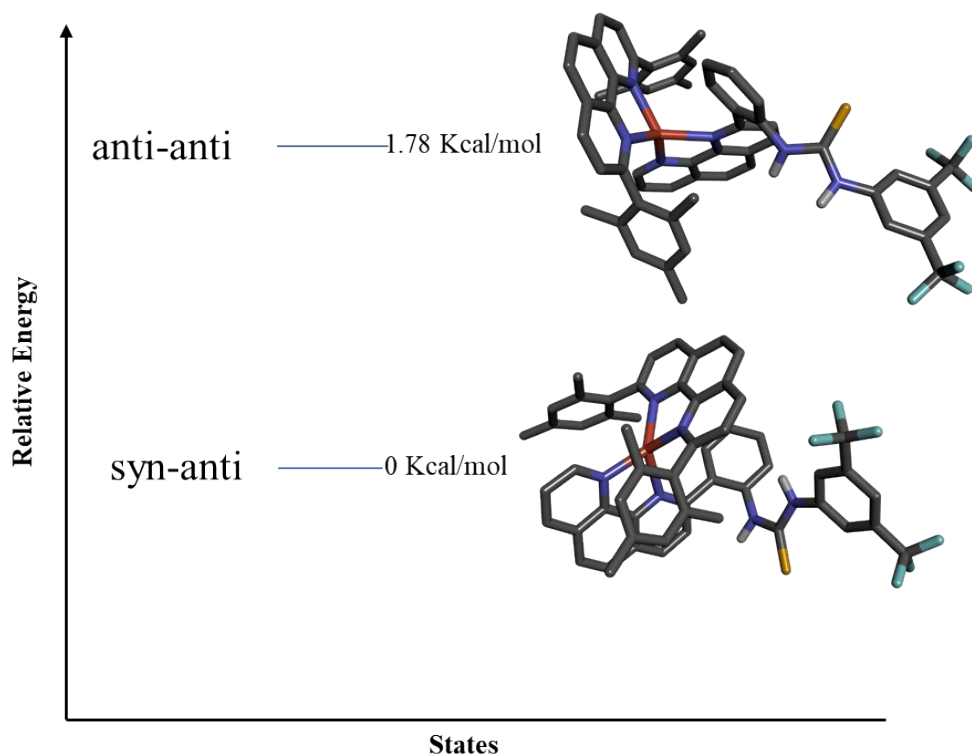

**Figure S3:** Relative energies of 6-311G (d, p)-optimized geometries of different configuration of  $[\text{Cu (1)(3)}]^+$ . It was found that the syn-anti is more stable compare to anti-anti.

**Table S1.** Crystal data and structure refinement for **1**.

|                        |                                                              |                 |
|------------------------|--------------------------------------------------------------|-----------------|
| Identification code    | shelx                                                        |                 |
| Empirical formula      | $\text{C}_{27} \text{H}_{16} \text{F}_6 \text{N}_4 \text{S}$ |                 |
| Formula weight         | 542.50                                                       |                 |
| Temperature            | 140(2) K                                                     |                 |
| Wavelength             | 0.71073 Å                                                    |                 |
| Crystal system         | Triclinic                                                    |                 |
| Space group            | P -1                                                         |                 |
| Unit cell dimensions   | a = 9.1911(17) Å                                             | a = 81.801(7)°. |
|                        | b = 9.8765(19) Å                                             | b = 74.954(6)°. |
|                        | c = 13.755(3) Å                                              | g = 79.844(6)°. |
| Volume                 | 1180.8(4) Å <sup>3</sup>                                     |                 |
| Z                      | 2                                                            |                 |
| Density (calculated)   | 1.526 Mg/m <sup>3</sup>                                      |                 |
| Absorption coefficient | 0.210 mm <sup>-1</sup>                                       |                 |
| F(000)                 | 552                                                          |                 |
| Crystal size           | 0.095 x 0.068 x 0.048 mm <sup>3</sup>                        |                 |

|                                   |                                             |
|-----------------------------------|---------------------------------------------|
| Theta range for data collection   | 2.457 to 24.997°.                           |
| Index ranges                      | -12<=h<=12, -13<=k<=13, -18<=l<=18          |
| Reflections collected             | 4157                                        |
| Independent reflections           | 4157 [R(int) = 0.0498]                      |
| Completeness to theta = 24.997°   | 99.9 %                                      |
| Refinement method                 | Full-matrix least-squares on F <sup>2</sup> |
| Data / restraints / parameters    | 4157 / 30 / 398                             |
| Goodness-of-fit on F <sup>2</sup> | 1.069                                       |
| Final R indices [I>2sigma(I)]     | R1 = 0.0405, wR2 = 0.1010                   |
| R indices (all data)              | R1 = 0.0658, wR2 = 0.1107                   |
| Extinction coefficient            | n/a                                         |
| Largest diff. peak and hole       | 0.167 and -0.177 e.Å <sup>-3</sup>          |

**Table S2.** Atomic coordinates ( x 10<sup>4</sup>) and equivalent isotropic displacement parameters (Å<sup>2</sup>x 10<sup>3</sup>)

for rb55. U(eq) is defined as one third of the trace of the orthogonalized U<sup>ij</sup> tensor.

|       | x        | y       | z       | U(eq) |
|-------|----------|---------|---------|-------|
| C(1)  | 4553(2)  | 4305(2) | 3542(1) | 40(1) |
| C(2)  | 3419(2)  | 3812(2) | 5404(1) | 39(1) |
| C(3)  | 2256(2)  | 4926(2) | 5566(2) | 54(1) |
| C(4)  | 1146(2)  | 4957(3) | 6452(2) | 62(1) |
| C(5)  | 1184(2)  | 3900(3) | 7207(2) | 64(1) |
| C(6)  | 2344(2)  | 2816(2) | 7075(2) | 51(1) |
| C(7)  | 3508(2)  | 2721(2) | 6189(1) | 39(1) |
| C(8)  | 4733(2)  | 1510(2) | 6114(1) | 38(1) |
| C(9)  | 4728(2)  | 407(2)  | 6890(2) | 53(1) |
| C(10) | 5848(2)  | -689(2) | 6774(2) | 54(1) |
| C(11) | 7016(2)  | -763(2) | 5893(1) | 42(1) |
| C(12) | 6981(2)  | 370(2)  | 5157(1) | 35(1) |
| C(13) | 8183(2)  | 375(2)  | 4239(1) | 36(1) |
| C(14) | 9297(2)  | 1471(2) | 2717(2) | 50(1) |
| C(15) | 10511(2) | 398(2)  | 2532(2) | 52(1) |
| C(16) | 10534(2) | -717(2) | 3230(2) | 50(1) |
| C(17) | 9362(2)  | -757(2) | 4119(1) | 40(1) |

|       |          |          |           |        |
|-------|----------|----------|-----------|--------|
| C(18) | 9327(2)  | -1902(2) | 4881(2)   | 50(1)  |
| C(19) | 8202(2)  | -1906(2) | 5729(2)   | 50(1)  |
| C(20) | 6278(2)  | 4050(2)  | 1838(1)   | 40(1)  |
| C(21) | 6319(2)  | 5381(2)  | 1357(2)   | 46(1)  |
| C(22) | 6863(2)  | 5572(2)  | 321(2)    | 50(1)  |
| C(23) | 7047(4)  | 7002(3)  | -185(2)   | 74(1)  |
| C(24) | 7340(2)  | 4471(2)  | -254(2)   | 56(1)  |
| C(25) | 7312(2)  | 3142(2)  | 231(2)    | 52(1)  |
| C(26) | 7869(4)  | 1930(3)  | -368(2)   | 74(1)  |
| C(27) | 6782(2)  | 2943(2)  | 1269(1)   | 46(1)  |
| N(1)  | 4530(2)  | 3735(2)  | 4499(1)   | 41(1)  |
| N(2)  | 5840(2)  | 3767(2)  | 2898(1)   | 45(1)  |
| N(3)  | 8148(2)  | 1478(2)  | 3525(1)   | 42(1)  |
| N(4)  | 5856(2)  | 1466(2)  | 5279(1)   | 36(1)  |
| S(1)  | 3203(1)  | 5440(1)  | 3142(1)   | 60(1)  |
| F(1)  | 7466(11) | 2115(7)  | -1222(4)  | 107(3) |
| F(2)  | 9370(7)  | 1689(8)  | -621(7)   | 125(3) |
| F(3)  | 7430(10) | 788(7)   | 108(5)    | 110(3) |
| F(4)  | 6445(13) | 7353(10) | -928(8)   | 127(4) |
| F(5)  | 8525(10) | 7114(12) | -533(10)  | 154(4) |
| F(6)  | 6536(17) | 7982(6)  | 452(5)    | 142(4) |
| F(3') | 6895(15) | 1640(20) | -811(18)  | 174(8) |
| F(4') | 7260(30) | 7040(20) | -1190(12) | 156(8) |
| F(1') | 9040(30) | 2060(20) | -1083(16) | 179(8) |
| F(5') | 8136(19) | 7431(15) | -87(15)   | 115(6) |
| F(6') | 5842(12) | 7864(10) | 72(15)    | 118(5) |
| F(2') | 8250(40) | 852(17)  | 181(12)   | 190(9) |

---

**Table S3.** Bond lengths [Å] and angles [°] for **1**.

---

|             |            |
|-------------|------------|
| C(1)-N(1)   | 1.352(2)   |
| C(1)-N(2)   | 1.354(2)   |
| C(1)-S(1)   | 1.6682(18) |
| C(2)-C(3)   | 1.391(3)   |
| C(2)-N(1)   | 1.393(2)   |
| C(2)-C(7)   | 1.420(2)   |
| C(3)-C(4)   | 1.371(3)   |
| C(4)-C(5)   | 1.366(3)   |
| C(5)-C(6)   | 1.366(3)   |
| C(6)-C(7)   | 1.400(3)   |
| C(7)-C(8)   | 1.487(3)   |
| C(8)-N(4)   | 1.330(2)   |
| C(8)-C(9)   | 1.412(2)   |
| C(9)-C(10)  | 1.352(3)   |
| C(10)-C(11) | 1.396(3)   |
| C(11)-C(12) | 1.400(2)   |
| C(11)-C(19) | 1.423(3)   |
| C(12)-N(4)  | 1.355(2)   |
| C(12)-C(13) | 1.447(2)   |
| C(13)-N(3)  | 1.360(2)   |
| C(13)-C(17) | 1.408(2)   |
| C(14)-N(3)  | 1.320(2)   |
| C(14)-C(15) | 1.395(3)   |
| C(15)-C(16) | 1.355(3)   |
| C(16)-C(17) | 1.405(3)   |
| C(17)-C(18) | 1.427(3)   |
| C(18)-C(19) | 1.343(3)   |
| C(20)-C(27) | 1.379(3)   |
| C(20)-C(21) | 1.387(2)   |
| C(20)-N(2)  | 1.409(2)   |
| C(21)-C(22) | 1.381(3)   |
| C(22)-C(24) | 1.377(3)   |
| C(22)-C(23) | 1.500(3)   |
| C(23)-F(5') | 1.198(10)  |
| C(23)-F(4)  | 1.263(8)   |
| C(23)-F(6') | 1.275(9)   |

|             |           |
|-------------|-----------|
| C(23)-F(5)  | 1.337(9)  |
| C(23)-F(6)  | 1.339(6)  |
| C(23)-F(4') | 1.341(16) |
| C(24)-C(25) | 1.386(3)  |
| C(25)-C(27) | 1.382(3)  |
| C(25)-C(26) | 1.490(3)  |
| C(26)-F(2') | 1.266(16) |
| C(26)-F(1') | 1.267(11) |
| C(26)-F(3') | 1.294(11) |
| C(26)-F(3)  | 1.295(7)  |
| C(26)-F(1)  | 1.301(6)  |
| C(26)-F(2)  | 1.319(7)  |

|                   |            |
|-------------------|------------|
| N(1)-C(1)-N(2)    | 109.98(15) |
| N(1)-C(1)-S(1)    | 127.58(14) |
| N(2)-C(1)-S(1)    | 122.36(14) |
| C(3)-C(2)-N(1)    | 122.22(17) |
| C(3)-C(2)-C(7)    | 119.54(17) |
| N(1)-C(2)-C(7)    | 118.23(16) |
| C(4)-C(3)-C(2)    | 121.1(2)   |
| C(5)-C(4)-C(3)    | 120.3(2)   |
| C(4)-C(5)-C(6)    | 119.5(2)   |
| C(5)-C(6)-C(7)    | 123.1(2)   |
| C(6)-C(7)-C(2)    | 116.42(17) |
| C(6)-C(7)-C(8)    | 119.49(17) |
| C(2)-C(7)-C(8)    | 124.08(16) |
| N(4)-C(8)-C(9)    | 119.47(17) |
| N(4)-C(8)-C(7)    | 118.37(15) |
| C(9)-C(8)-C(7)    | 122.16(17) |
| C(10)-C(9)-C(8)   | 119.92(19) |
| C(9)-C(10)-C(11)  | 121.30(18) |
| C(10)-C(11)-C(12) | 116.35(17) |
| C(10)-C(11)-C(19) | 123.33(18) |
| C(12)-C(11)-C(19) | 120.32(18) |
| N(4)-C(12)-C(11)  | 122.03(17) |
| N(4)-C(12)-C(13)  | 118.85(15) |
| C(11)-C(12)-C(13) | 119.12(16) |
| N(3)-C(13)-C(17)  | 122.19(17) |



|                   |            |
|-------------------|------------|
| N(3)-C(13)-C(12)  | 119.02(15) |
| C(17)-C(13)-C(12) | 118.79(16) |
| N(3)-C(14)-C(15)  | 124.62(19) |
| C(16)-C(15)-C(14) | 118.34(19) |
| C(15)-C(16)-C(17) | 119.77(18) |
| C(16)-C(17)-C(13) | 117.82(17) |
| C(16)-C(17)-C(18) | 122.24(17) |
| C(13)-C(17)-C(18) | 119.94(18) |
| C(19)-C(18)-C(17) | 120.98(18) |
| C(18)-C(19)-C(11) | 120.81(18) |
| C(27)-C(20)-C(21) | 119.21(17) |
| C(27)-C(20)-N(2)  | 117.81(17) |
| C(21)-C(20)-N(2)  | 122.83(18) |
| C(22)-C(21)-C(20) | 119.50(19) |
| C(24)-C(22)-C(21) | 121.56(19) |
| C(24)-C(22)-C(23) | 119.0(2)   |
| C(21)-C(22)-C(23) | 119.3(2)   |
| F(5')-C(23)-F(6') | 110.8(9)   |
| F(4)-C(23)-F(5)   | 106.6(6)   |
| F(4)-C(23)-F(6)   | 108.0(6)   |
| F(5)-C(23)-F(6)   | 103.4(6)   |
| F(5')-C(23)-F(4') | 103.9(10)  |
| F(6')-C(23)-F(4') | 103.8(8)   |
| F(5')-C(23)-C(22) | 114.5(6)   |
| F(4)-C(23)-C(22)  | 114.8(5)   |
| F(6')-C(23)-C(22) | 112.2(4)   |
| F(5)-C(23)-C(22)  | 110.0(5)   |
| F(6)-C(23)-C(22)  | 113.3(3)   |
| F(4')-C(23)-C(22) | 110.9(9)   |
| C(22)-C(24)-C(25) | 118.72(19) |
| C(27)-C(25)-C(24) | 120.0(2)   |
| C(27)-C(25)-C(26) | 120.1(2)   |
| C(24)-C(25)-C(26) | 119.9(2)   |
| F(2')-C(26)-F(1') | 105.0(11)  |
| F(2')-C(26)-F(3') | 107.4(10)  |
| F(1')-C(26)-F(3') | 103.7(9)   |
| F(3)-C(26)-F(1)   | 107.2(5)   |
| F(3)-C(26)-F(2)   | 106.0(6)   |

|                   |            |
|-------------------|------------|
| F(1)-C(26)-F(2)   | 105.0(4)   |
| F(2')-C(26)-C(25) | 111.2(8)   |
| F(1')-C(26)-C(25) | 114.5(6)   |
| F(3')-C(26)-C(25) | 114.3(6)   |
| F(3)-C(26)-C(25)  | 113.9(4)   |
| F(1)-C(26)-C(25)  | 112.9(3)   |
| F(2)-C(26)-C(25)  | 111.2(4)   |
| C(20)-C(27)-C(25) | 120.96(18) |
| C(1)-N(1)-C(2)    | 132.74(15) |
| C(1)-N(2)-C(20)   | 127.99(15) |
| C(14)-N(3)-C(13)  | 117.24(16) |
| C(8)-N(4)-C(12)   | 120.91(15) |

**Table S4.** Anisotropic displacement parameters ( $\text{\AA}^2 \times 10^3$ ) for **1**. The anisotropic displacement factor exponent takes the form:  $-2p^2[ h^2 a^* 2U^{11} + \dots + 2 h k a^* b^* U^{12} ]$

|       | U <sup>11</sup> | U <sup>22</sup> | U <sup>33</sup> | U <sup>23</sup> | U <sup>13</sup> | U <sup>12</sup> |
|-------|-----------------|-----------------|-----------------|-----------------|-----------------|-----------------|
| C(1)  | 45(1)           | 35(1)           | 39(1)           | 1(1)            | -12(1)          | -5(1)           |
| C(2)  | 37(1)           | 41(1)           | 37(1)           | -5(1)           | -9(1)           | -5(1)           |
| C(3)  | 53(1)           | 54(1)           | 49(1)           | -7(1)           | -11(1)          | 6(1)            |
| C(4)  | 47(1)           | 67(2)           | 63(2)           | -16(1)          | -7(1)           | 10(1)           |
| C(5)  | 50(1)           | 78(2)           | 51(1)           | -13(1)          | 7(1)            | -3(1)           |
| C(6)  | 50(1)           | 60(1)           | 39(1)           | -1(1)           | -5(1)           | -10(1)          |
| C(7)  | 38(1)           | 44(1)           | 37(1)           | -4(1)           | -10(1)          | -10(1)          |
| C(8)  | 41(1)           | 44(1)           | 33(1)           | 3(1)            | -14(1)          | -13(1)          |
| C(9)  | 48(1)           | 61(2)           | 44(1)           | 12(1)           | -7(1)           | -11(1)          |
| C(10) | 59(1)           | 50(1)           | 51(1)           | 22(1)           | -20(1)          | -14(1)          |
| C(11) | 44(1)           | 39(1)           | 47(1)           | 7(1)            | -22(1)          | -11(1)          |
| C(12) | 39(1)           | 33(1)           | 39(1)           | 1(1)            | -20(1)          | -6(1)           |
| C(13) | 41(1)           | 32(1)           | 40(1)           | -3(1)           | -18(1)          | -5(1)           |
| C(14) | 50(1)           | 49(1)           | 45(1)           | -1(1)           | -10(1)          | -1(1)           |
| C(15) | 49(1)           | 57(1)           | 47(1)           | -14(1)          | -5(1)           | -1(1)           |
| C(16) | 50(1)           | 44(1)           | 58(1)           | -19(1)          | -17(1)          | 7(1)            |
| C(17) | 44(1)           | 34(1)           | 49(1)           | -10(1)          | -22(1)          | 0(1)            |
| C(18) | 55(1)           | 32(1)           | 69(2)           | -4(1)           | -30(1)          | 3(1)            |

|       |         |         |         |          |         |         |
|-------|---------|---------|---------|----------|---------|---------|
| C(19) | 58(1)   | 34(1)   | 64(2)   | 10(1)    | -29(1)  | -7(1)   |
| C(20) | 44(1)   | 42(1)   | 33(1)   | 4(1)     | -10(1)  | -4(1)   |
| C(21) | 53(1)   | 40(1)   | 46(1)   | 2(1)     | -16(1)  | -7(1)   |
| C(22) | 54(1)   | 49(1)   | 45(1)   | 13(1)    | -14(1)  | -14(1)  |
| C(23) | 88(2)   | 64(2)   | 65(2)   | 20(2)    | -16(2)  | -24(2)  |
| C(24) | 61(1)   | 63(2)   | 37(1)   | 10(1)    | -3(1)   | -13(1)  |
| C(25) | 57(1)   | 55(1)   | 40(1)   | -3(1)    | -5(1)   | -7(1)   |
| C(26) | 96(2)   | 67(2)   | 49(2)   | -9(2)    | -6(2)   | 2(2)    |
| C(27) | 52(1)   | 42(1)   | 41(1)   | 6(1)     | -9(1)   | -7(1)   |
| N(1)  | 39(1)   | 43(1)   | 33(1)   | 2(1)     | -8(1)   | 5(1)    |
| N(2)  | 50(1)   | 46(1)   | 31(1)   | 4(1)     | -10(1)  | 8(1)    |
| N(3)  | 42(1)   | 42(1)   | 39(1)   | 2(1)     | -9(1)   | 0(1)    |
| N(4)  | 39(1)   | 37(1)   | 34(1)   | 1(1)     | -12(1)  | -6(1)   |
| S(1)  | 57(1)   | 59(1)   | 54(1)   | 9(1)     | -18(1)  | 11(1)   |
| F(1)  | 167(6)  | 98(3)   | 53(2)   | -28(2)   | -40(3)  | 31(4)   |
| F(2)  | 80(3)   | 128(5)  | 151(7)  | -59(5)   | -8(4)   | 35(3)   |
| F(3)  | 200(6)  | 52(3)   | 65(3)   | -16(2)   | 9(3)    | -36(4)  |
| F(4)  | 186(7)  | 97(5)   | 128(9)  | 70(6)    | -109(6) | -57(5)  |
| F(5)  | 106(4)  | 130(6)  | 195(8)  | 68(5)    | -2(5)   | -59(3)  |
| F(6)  | 266(12) | 56(2)   | 100(3)  | 14(2)    | -29(5)  | -52(4)  |
| F(3') | 147(7)  | 218(15) | 194(17) | -141(13) | -26(9)  | -49(8)  |
| F(4') | 290(20) | 110(9)  | 66(5)   | 49(5)    | -38(10) | -72(12) |
| F(1') | 210(19) | 146(11) | 137(11) | -84(8)   | 115(10) | -90(11) |
| F(5') | 118(10) | 82(6)   | 176(13) | 49(8)    | -87(10) | -72(7)  |
| F(6') | 116(6)  | 45(4)   | 163(13) | 28(6)    | -11(6)  | 4(4)    |
| F(2') | 320(20) | 96(9)   | 114(8)  | -49(7)   | -37(13) | 74(12)  |

**Table S5.** Hydrogen coordinates ( $\times 10^4$ ) and isotropic displacement parameters ( $\text{\AA}^2 \times 10^3$ ) for **1**.

|      | x    | y    | z    | U(eq) |
|------|------|------|------|-------|
| H(3) | 2230 | 5679 | 5054 | 64    |
| H(4) | 347  | 5716 | 6541 | 74    |
| H(5) | 411  | 3918 | 7818 | 76    |
| H(6) | 2360 | 2094 | 7610 | 61    |
| H(9) | 3938 | 435  | 7493 | 64    |

|       |       |       |      |    |
|-------|-------|-------|------|----|
| H(10) | 5839  | -1423 | 7302 | 65 |
| H(14) | 9297  | 2252  | 2226 | 59 |
| H(15) | 11303 | 447   | 1932 | 63 |
| H(16) | 11339 | -1469 | 3119 | 61 |
| H(18) | 10112 | -2673 | 4788 | 60 |
| H(19) | 8198  | -2681 | 6225 | 60 |
| H(21) | 5975  | 6155  | 1738 | 55 |
| H(24) | 7681  | 4620  | -969 | 67 |
| H(27) | 6766  | 2029  | 1596 | 55 |
| H(1)  | 5387  | 3212  | 4562 | 49 |
| H(2)  | 6481  | 3167  | 3176 | 54 |

**Table S6.** Torsion angles [°] for **1**.

---

|                         |             |
|-------------------------|-------------|
| N(1)-C(2)-C(3)-C(4)     | 177.82(19)  |
| C(7)-C(2)-C(3)-C(4)     | -3.5(3)     |
| C(2)-C(3)-C(4)-C(5)     | 1.6(4)      |
| C(3)-C(4)-C(5)-C(6)     | 0.5(4)      |
| C(4)-C(5)-C(6)-C(7)     | -0.6(4)     |
| C(5)-C(6)-C(7)-C(2)     | -1.2(3)     |
| C(5)-C(6)-C(7)-C(8)     | 179.5(2)    |
| C(3)-C(2)-C(7)-C(6)     | 3.2(3)      |
| N(1)-C(2)-C(7)-C(6)     | -178.04(16) |
| C(3)-C(2)-C(7)-C(8)     | -177.60(18) |
| N(1)-C(2)-C(7)-C(8)     | 1.2(3)      |
| C(6)-C(7)-C(8)-N(4)     | -177.68(17) |
| C(2)-C(7)-C(8)-N(4)     | 3.1(3)      |
| C(6)-C(7)-C(8)-C(9)     | 3.1(3)      |
| C(2)-C(7)-C(8)-C(9)     | -176.09(18) |
| N(4)-C(8)-C(9)-C(10)    | -0.9(3)     |
| C(7)-C(8)-C(9)-C(10)    | 178.33(19)  |
| C(8)-C(9)-C(10)-C(11)   | -0.4(3)     |
| C(9)-C(10)-C(11)-C(12)  | 1.6(3)      |
| C(9)-C(10)-C(11)-C(19)  | -178.8(2)   |
| C(10)-C(11)-C(12)-N(4)  | -1.6(3)     |
| C(19)-C(11)-C(12)-N(4)  | 178.81(17)  |
| C(10)-C(11)-C(12)-C(13) | 178.31(16)  |
| C(19)-C(11)-C(12)-C(13) | -1.3(3)     |

|                         |             |
|-------------------------|-------------|
| N(4)-C(12)-C(13)-N(3)   | 0.0(2)      |
| C(11)-C(12)-C(13)-N(3)  | -179.90(15) |
| N(4)-C(12)-C(13)-C(17)  | 179.24(16)  |
| C(11)-C(12)-C(13)-C(17) | -0.7(3)     |
| N(3)-C(14)-C(15)-C(16)  | -0.6(3)     |
| C(14)-C(15)-C(16)-C(17) | -0.9(3)     |
| C(15)-C(16)-C(17)-C(13) | 1.0(3)      |
| C(15)-C(16)-C(17)-C(18) | -179.86(19) |
| N(3)-C(13)-C(17)-C(16)  | 0.5(3)      |
| C(12)-C(13)-C(17)-C(16) | -178.70(16) |
| N(3)-C(13)-C(17)-C(18)  | -178.69(17) |
| C(12)-C(13)-C(17)-C(18) | 2.1(3)      |
| C(16)-C(17)-C(18)-C(19) | 179.22(18)  |
| C(13)-C(17)-C(18)-C(19) | -1.6(3)     |
| C(17)-C(18)-C(19)-C(11) | -0.4(3)     |
| C(10)-C(11)-C(19)-C(18) | -177.73(19) |
| C(12)-C(11)-C(19)-C(18) | 1.8(3)      |
| C(27)-C(20)-C(21)-C(22) | 0.0(3)      |
| N(2)-C(20)-C(21)-C(22)  | 175.47(17)  |
| C(20)-C(21)-C(22)-C(24) | 1.3(3)      |
| C(20)-C(21)-C(22)-C(23) | -174.1(2)   |
| C(24)-C(22)-C(23)-F(5') | -99.4(13)   |
| C(21)-C(22)-C(23)-F(5') | 76.2(13)    |
| C(24)-C(22)-C(23)-F(4)  | 55.0(7)     |
| C(21)-C(22)-C(23)-F(4)  | -129.4(7)   |
| C(24)-C(22)-C(23)-F(6') | 133.3(12)   |
| C(21)-C(22)-C(23)-F(6') | -51.1(13)   |
| C(24)-C(22)-C(23)-F(5)  | -65.1(8)    |
| C(21)-C(22)-C(23)-F(5)  | 110.5(7)    |
| C(24)-C(22)-C(23)-F(6)  | 179.7(8)    |
| C(21)-C(22)-C(23)-F(6)  | -4.7(9)     |
| C(24)-C(22)-C(23)-F(4') | 17.8(13)    |
| C(21)-C(22)-C(23)-F(4') | -166.6(13)  |
| C(21)-C(22)-C(24)-C(25) | -2.0(3)     |
| C(23)-C(22)-C(24)-C(25) | 173.5(2)    |
| C(22)-C(24)-C(25)-C(27) | 1.3(3)      |
| C(22)-C(24)-C(25)-C(26) | -178.0(2)   |
| C(27)-C(25)-C(26)-F(2') | -21.6(18)   |

|                         |             |
|-------------------------|-------------|
| C(24)-C(25)-C(26)-F(2') | 157.7(17)   |
| C(27)-C(25)-C(26)-F(1') | -140.4(17)  |
| C(24)-C(25)-C(26)-F(1') | 38.9(17)    |
| C(27)-C(25)-C(26)-F(3') | 100.2(14)   |
| C(24)-C(25)-C(26)-F(3') | -80.5(14)   |
| C(27)-C(25)-C(26)-F(3)  | 17.8(6)     |
| C(24)-C(25)-C(26)-F(3)  | -162.9(5)   |
| C(27)-C(25)-C(26)-F(1)  | 140.4(6)    |
| C(24)-C(25)-C(26)-F(1)  | -40.3(7)    |
| C(27)-C(25)-C(26)-F(2)  | -101.8(5)   |
| C(24)-C(25)-C(26)-F(2)  | 77.5(5)     |
| C(21)-C(20)-C(27)-C(25) | -0.6(3)     |
| N(2)-C(20)-C(27)-C(25)  | -176.32(17) |
| C(24)-C(25)-C(27)-C(20) | -0.1(3)     |
| C(26)-C(25)-C(27)-C(20) | 179.2(2)    |
| N(2)-C(1)-N(1)-C(2)     | -171.88(18) |
| S(1)-C(1)-N(1)-C(2)     | 4.9(3)      |
| C(3)-C(2)-N(1)-C(1)     | -24.8(3)    |
| C(7)-C(2)-N(1)-C(1)     | 156.46(19)  |
| N(1)-C(1)-N(2)-C(20)    | 177.89(18)  |
| S(1)-C(1)-N(2)-C(20)    | 0.9(3)      |
| C(27)-C(20)-N(2)-C(1)   | -131.7(2)   |
| C(21)-C(20)-N(2)-C(1)   | 52.8(3)     |
| C(15)-C(14)-N(3)-C(13)  | 2.0(3)      |
| C(17)-C(13)-N(3)-C(14)  | -2.0(3)     |
| C(12)-C(13)-N(3)-C(14)  | 177.26(16)  |
| C(9)-C(8)-N(4)-C(12)    | 1.0(3)      |
| C(7)-C(8)-N(4)-C(12)    | -178.28(15) |
| C(11)-C(12)-N(4)-C(8)   | 0.3(3)      |
| C(13)-C(12)-N(4)-C(8)   | -179.60(15) |

**Table S7.** Hydrogen bonds for **1** [ $\text{\AA}$  and  $^\circ$ ].

| D-H...A          | d(D-H) | d(H...A) | d(D...A) | $\angle$ (DHA) |
|------------------|--------|----------|----------|----------------|
| C(3)-H(3)...S(1) | 0.95   | 2.58     | 3.209(2) | 124.0          |

|                  |      |      |          |       |
|------------------|------|------|----------|-------|
| N(1)-H(1)...N(4) | 0.88 | 1.90 | 2.586(2) | 133.7 |
| N(2)-H(2)...N(3) | 0.88 | 2.15 | 3.010(2) | 166.3 |
| C(3)-H(3)...S(1) | 0.95 | 2.58 | 3.209(2) | 124.0 |
| N(1)-H(1)...N(4) | 0.88 | 1.90 | 2.586(2) | 133.7 |
| N(2)-H(2)...N(3) | 0.88 | 2.15 | 3.010(2) | 166.3 |

**Table S8.** Crystal data and structure refinement for [Cu(1)(3)]PF<sub>6</sub>.

|                                   |                                                                    |                 |  |
|-----------------------------------|--------------------------------------------------------------------|-----------------|--|
| Identification code               | shelx                                                              |                 |  |
| Empirical formula                 | C <sub>57</sub> H <sub>44</sub> Cu F <sub>6</sub> N <sub>4</sub> S |                 |  |
| Formula weight                    | 1172.03                                                            |                 |  |
| Temperature                       | 140(2) K                                                           |                 |  |
| Wavelength                        | 0.71073 Å                                                          |                 |  |
| Crystal system                    | Triclinic                                                          |                 |  |
| Space group                       | P -1                                                               |                 |  |
| Unit cell dimensions              | a = 12.904(3) Å                                                    | α = 80.438(8)°. |  |
|                                   | b = 14.672(3) Å                                                    | β = 84.213(8)°. |  |
|                                   | c = 14.907(3) Å                                                    | γ = 66.335(7)°. |  |
| Volume                            | 2547.2(9) Å <sup>3</sup>                                           |                 |  |
| Z                                 | 2                                                                  |                 |  |
| Density (calculated)              | 1.528 Mg/m <sup>3</sup>                                            |                 |  |
| Absorption coefficient            | 0.613 mm <sup>-1</sup>                                             |                 |  |
| F(000)                            | 1196                                                               |                 |  |
| Crystal size                      | 0.085 x 0.042 x 0.030 mm <sup>3</sup>                              |                 |  |
| Theta range for data collection   | 1.530 to 25.000°.                                                  |                 |  |
| Index ranges                      | -15 ≤ h ≤ 15, -17 ≤ k ≤ 17, -17 ≤ l ≤ 17                           |                 |  |
| Reflections collected             | 66133                                                              |                 |  |
| Independent reflections           | 6868 [R(int) = 0.2516]                                             |                 |  |
| Completeness to theta = 25.000°   | 100.0 %                                                            |                 |  |
| Absorption correction             | Semi-empirical from equivalents                                    |                 |  |
| Max. and min. transmission        | 0.982 and 0.950                                                    |                 |  |
| Refinement method                 | Full-matrix least-squares on F <sup>2</sup>                        |                 |  |
| Data / restraints / parameters    | 6868 / 6 / 773                                                     |                 |  |
| Goodness-of-fit on F <sup>2</sup> | 1.030                                                              |                 |  |
| Final R indices [I > 2σ(I)]       | R1 = 0.0842, wR2 = 0.1789                                          |                 |  |
| R indices (all data)              | R1 = 0.2389, wR2 = 0.2602                                          |                 |  |
| Extinction coefficient            | n/a                                                                |                 |  |
| Largest diff. peak and hole       | 0.564 and -0.432 e.Å <sup>-3</sup>                                 |                 |  |

**Table S9.** Atomic coordinates ( $\times 10^4$ ) and equivalent isotropic displacement parameters ( $\text{\AA}^2 \times 10^3$ ) for [Cu(1)(3)]PF<sub>6</sub>. U(eq) is defined as one third of the trace of the orthogonalized U<sup>ij</sup> tensor.

|       | x       | y        | z        | U(eq) |
|-------|---------|----------|----------|-------|
| C(1)  | 5517(7) | 7790(7)  | -819(7)  | 46(2) |
| C(2)  | 5098(9) | 8507(9)  | -1585(7) | 60(3) |
| C(3)  | 4354(8) | 9448(8)  | -1440(9) | 62(3) |
| C(4)  | 4033(8) | 9662(7)  | -554(8)  | 53(3) |
| C(5)  | 3244(9) | 10639(8) | -372(10) | 67(3) |
| C(6)  | 2946(9) | 10805(8) | 482(10)  | 69(4) |
| C(7)  | 3398(8) | 10060(7) | 1240(9)  | 54(3) |
| C(8)  | 4198(7) | 9097(7)  | 1084(8)  | 44(2) |
| C(9)  | 4486(7) | 8904(6)  | 159(7)   | 42(2) |
| C(10) | 3132(8) | 10237(8) | 2135(10) | 65(3) |
| C(11) | 3681(8) | 9509(8)  | 2826(8)  | 63(3) |
| C(12) | 4526(7) | 8584(7)  | 2622(7)  | 48(2) |
| C(13) | 3359(7) | 6481(6)  | 1363(6)  | 37(2) |
| C(14) | 2756(8) | 5916(7)  | 1763(6)  | 47(2) |
| C(15) | 3293(9) | 5050(7)  | 2331(7)  | 56(3) |
| C(16) | 4417(8) | 4735(7)  | 2492(6)  | 45(2) |
| C(17) | 4987(8) | 5334(6)  | 2077(6)  | 39(2) |
| C(18) | 6171(7) | 5050(6)  | 2174(6)  | 38(2) |
| C(19) | 6787(8) | 4115(6)  | 2691(6)  | 42(2) |
| C(20) | 6191(9) | 3529(7)  | 3132(6)  | 51(3) |
| C(21) | 5080(9) | 3825(7)  | 3030(7)  | 54(3) |
| C(22) | 7953(8) | 3850(7)  | 2727(6)  | 52(3) |
| C(23) | 8439(8) | 4463(7)  | 2252(6)  | 46(2) |
| C(24) | 7793(8) | 5371(7)  | 1732(6)  | 44(2) |
| C(25) | 8339(7) | 5997(6)  | 1168(7)  | 40(2) |
| C(26) | 8465(7) | 5975(6)  | 242(6)   | 38(2) |
| C(27) | 9055(7) | 6507(6)  | -282(7)  | 45(2) |
| C(28) | 9494(7) | 7057(6)  | 102(8)   | 49(3) |
| C(29) | 9374(7) | 7060(7)  | 1020(8)  | 54(3) |
| C(30) | 8806(8) | 6542(7)  | 1573(7)  | 48(2) |



|       |           |          |          |        |
|-------|-----------|----------|----------|--------|
| C(31) | 8672(9)   | 6566(8)  | 2588(7)  | 71(3)  |
| C(32) | 8056(7)   | 5339(6)  | -210(6)  | 46(2)  |
| C(33) | 10120(8)  | 7620(7)  | -489(7)  | 66(3)  |
| C(34) | 2837(7)   | 7389(6)  | 679(6)   | 37(2)  |
| C(35) | 2071(7)   | 8308(6)  | 954(6)   | 39(2)  |
| C(36) | 1608(7)   | 9121(6)  | 297(7)   | 43(2)  |
| C(37) | 1846(7)   | 9082(7)  | -613(7)  | 42(2)  |
| C(38) | 2591(7)   | 8167(7)  | -864(6)  | 44(2)  |
| C(39) | 3102(7)   | 7326(6)  | -239(6)  | 37(2)  |
| C(40) | 3911(8)   | 6356(7)  | -546(6)  | 54(3)  |
| C(41) | 1332(8)   | 9972(7)  | -1322(7) | 62(3)  |
| C(42) | 1785(8)   | 8392(7)  | 1931(6)  | 53(3)  |
| C(43) | 5182(8)   | 7844(7)  | 3368(7)  | 53(3)  |
| C(44) | 5204(9)   | 6894(8)  | 3475(7)  | 62(3)  |
| C(45) | 5842(10)  | 6143(8)  | 4167(8)  | 74(3)  |
| C(46) | 6397(10)  | 6389(9)  | 4738(8)  | 76(3)  |
| C(47) | 6343(10)  | 7349(10) | 4664(7)  | 76(3)  |
| C(48) | 5775(9)   | 8069(8)  | 3987(7)  | 58(3)  |
| C(49) | 6542(10)  | 9399(8)  | 4011(7)  | 68(3)  |
| C(50) | 8678(9)   | 8750(8)  | 3963(7)  | 55(3)  |
| C(51) | 9585(9)   | 7859(7)  | 4207(7)  | 57(3)  |
| C(52) | 10612(10) | 7847(8)  | 4251(7)  | 64(3)  |
| C(53) | 10804(9)  | 8739(8)  | 4068(7)  | 62(3)  |
| C(54) | 9900(9)   | 9628(8)  | 3813(7)  | 58(3)  |
| C(55) | 8838(9)   | 9654(7)  | 3756(6)  | 57(3)  |
| C(56) | 10079(11) | 10590(9) | 3556(9)  | 68(3)  |
| C(57) | 11663(17) | 6886(11) | 4476(14) | 85(5)  |
| Cu(1) | 5547(1)   | 6997(1)  | 1176(1)  | 47(1)  |
| F(1)  | 10252(7)  | 10792(5) | 2669(5)  | 105(2) |
| F(2)  | 10976(7)  | 10561(5) | 3941(6)  | 115(3) |
| F(3)  | 9204(6)   | 11364(5) | 3803(5)  | 103(2) |
| F(11) | 7711(6)   | 8082(5)  | 6217(5)  | 105(2) |
| F(12) | 8867(5)   | 5908(4)  | 7364(4)  | 79(2)  |
| N(1)  | 5237(6)   | 7954(5)  | 29(5)    | 42(2)  |
| N(2)  | 4734(6)   | 8374(5)  | 1767(6)  | 45(2)  |
| N(3)  | 6673(6)   | 5669(5)  | 1717(4)  | 36(2)  |
| N(4)  | 4435(6)   | 6213(5)  | 1515(5)  | 36(2)  |
| N(5)  | 5699(7)   | 9096(6)  | 3936(6)  | 71(3)  |

|        |           |          |          |         |
|--------|-----------|----------|----------|---------|
| N(6)   | 7614(8)   | 8713(6)  | 3905(6)  | 69(3)   |
| S(1)   | 6191(3)   | 10588(2) | 4166(3)  | 94(1)   |
| Cl(1)  | 8292(3)   | 6997(2)  | 6782(2)  | 77(1)   |
| F(4)   | 11300(30) | 6150(40) | 4580(40) | 240(30) |
| F(5)   | 12040(30) | 6780(30) | 5200(20) | 179(19) |
| F(6)   | 12360(20) | 6660(20) | 3847(17) | 125(11) |
| F(7)   | 8535(14)  | 6597(13) | 5814(9)  | 92(7)   |
| F(8)   | 9429(12)  | 7119(14) | 6690(18) | 98(10)  |
| F(9)   | 7980(20)  | 7466(10) | 7695(10) | 101(10) |
| F(10)  | 7096(9)   | 6942(10) | 6797(14) | 68(6)   |
| F(4')  | 11350(30) | 6240(30) | 5150(20) | 94(10)  |
| F(5')  | 11750(60) | 6260(30) | 3890(30) | 160(20) |
| F(6')  | 12520(30) | 6980(20) | 4710(60) | 160(30) |
| F(7')  | 7820(40)  | 6400(20) | 6275(19) | 131(16) |
| F(8')  | 9440(30)  | 6650(20) | 6160(20) | 146(16) |
| F(9')  | 8890(30)  | 7423(14) | 7397(19) | 72(8)   |
| F(10') | 7270(20)  | 7187(18) | 7540(20) | 113(15) |

---

**Table S10.** Bond lengths [Å] and angles [°] for [Cu(1)(3)]PF<sub>6</sub>.

---

|             |           |
|-------------|-----------|
| C(1)-N(1)   | 1.313(11) |
| C(1)-C(2)   | 1.405(12) |
| C(2)-C(3)   | 1.366(13) |
| C(3)-C(4)   | 1.392(14) |
| C(4)-C(9)   | 1.386(12) |
| C(4)-C(5)   | 1.438(14) |
| C(5)-C(6)   | 1.325(14) |
| C(6)-C(7)   | 1.423(14) |
| C(7)-C(10)  | 1.384(14) |
| C(7)-C(8)   | 1.416(12) |
| C(8)-N(2)   | 1.354(11) |
| C(8)-C(9)   | 1.436(13) |
| C(9)-N(1)   | 1.373(10) |
| C(10)-C(11) | 1.371(14) |
| C(11)-C(12) | 1.417(13) |
| C(12)-N(2)  | 1.336(11) |
| C(12)-C(43) | 1.478(13) |

|             |           |
|-------------|-----------|
| C(13)-N(4)  | 1.315(10) |
| C(13)-C(14) | 1.382(11) |
| C(13)-C(34) | 1.495(11) |
| C(14)-C(15) | 1.366(12) |
| C(15)-C(16) | 1.367(12) |
| C(16)-C(17) | 1.394(11) |
| C(16)-C(21) | 1.423(12) |
| C(17)-N(4)  | 1.377(10) |
| C(17)-C(18) | 1.429(11) |
| C(18)-N(3)  | 1.373(10) |
| C(18)-C(19) | 1.416(11) |
| C(19)-C(22) | 1.400(12) |
| C(19)-C(20) | 1.415(11) |
| C(20)-C(21) | 1.338(12) |
| C(22)-C(23) | 1.362(11) |
| C(23)-C(24) | 1.402(12) |
| C(24)-N(3)  | 1.333(10) |
| C(24)-C(25) | 1.480(12) |
| C(25)-C(26) | 1.379(11) |
| C(25)-C(30) | 1.411(12) |
| C(26)-C(27) | 1.397(11) |
| C(26)-C(32) | 1.510(11) |
| C(27)-C(28) | 1.374(12) |
| C(28)-C(29) | 1.361(13) |
| C(28)-C(33) | 1.504(12) |
| C(29)-C(30) | 1.383(13) |
| C(30)-C(31) | 1.509(13) |
| C(34)-C(39) | 1.386(11) |
| C(34)-C(35) | 1.413(11) |
| C(35)-C(36) | 1.377(11) |
| C(35)-C(42) | 1.479(12) |
| C(36)-C(37) | 1.366(12) |
| C(37)-C(38) | 1.387(12) |
| C(37)-C(41) | 1.501(12) |
| C(38)-C(39) | 1.384(11) |
| C(39)-C(40) | 1.501(11) |
| C(43)-C(44) | 1.366(12) |
| C(43)-C(48) | 1.411(13) |

|             |           |
|-------------|-----------|
| C(44)-C(45) | 1.421(14) |
| C(45)-C(46) | 1.342(14) |
| C(46)-C(47) | 1.368(14) |
| C(47)-C(48) | 1.358(14) |
| C(48)-N(5)  | 1.460(12) |
| C(49)-N(5)  | 1.350(12) |
| C(49)-N(6)  | 1.357(12) |
| C(49)-S(1)  | 1.668(11) |
| C(50)-C(51) | 1.383(13) |
| C(50)-C(55) | 1.404(12) |
| C(50)-N(6)  | 1.407(12) |
| C(51)-C(52) | 1.327(13) |
| C(52)-C(53) | 1.405(13) |
| C(52)-C(57) | 1.530(18) |
| C(53)-C(54) | 1.382(13) |
| C(54)-C(55) | 1.366(13) |
| C(54)-C(56) | 1.502(14) |
| C(56)-F(3)  | 1.314(12) |
| C(56)-F(1)  | 1.322(12) |
| C(56)-F(2)  | 1.326(12) |
| C(57)-F(5)  | 1.19(2)   |
| C(57)-F(6)  | 1.22(2)   |
| C(57)-F(6') | 1.25(4)   |
| C(57)-F(4)  | 1.33(5)   |
| C(57)-F(5') | 1.33(4)   |
| C(57)-F(4') | 1.40(4)   |
| Cu(1)-N(1)  | 1.986(7)  |
| Cu(1)-N(3)  | 2.000(7)  |
| Cu(1)-N(4)  | 2.149(6)  |
| Cu(1)-N(2)  | 2.160(7)  |
| F(11)-Cl(1) | 1.590(6)  |
| F(12)-Cl(1) | 1.604(6)  |
| Cl(1)-F(8)  | 1.538(11) |
| Cl(1)-F(7') | 1.563(16) |
| Cl(1)-F(9)  | 1.570(14) |
| Cl(1)-F(10) | 1.576(10) |
| Cl(1)-F(9') | 1.600(17) |
| Cl(1)-F(7)  | 1.602(12) |

|                   |           |
|-------------------|-----------|
| Cl(1)-F(10')      | 1.607(19) |
| Cl(1)-F(8')       | 1.61(2)   |
| N(1)-C(1)-C(2)    | 124.8(10) |
| C(3)-C(2)-C(1)    | 117.7(10) |
| C(2)-C(3)-C(4)    | 119.8(10) |
| C(9)-C(4)-C(3)    | 118.4(10) |
| C(9)-C(4)-C(5)    | 120.1(11) |
| C(3)-C(4)-C(5)    | 121.5(11) |
| C(6)-C(5)-C(4)    | 119.5(11) |
| C(5)-C(6)-C(7)    | 122.8(11) |
| C(10)-C(7)-C(8)   | 117.5(10) |
| C(10)-C(7)-C(6)   | 123.3(11) |
| C(8)-C(7)-C(6)    | 119.1(11) |
| N(2)-C(8)-C(7)    | 122.7(10) |
| N(2)-C(8)-C(9)    | 119.1(8)  |
| C(7)-C(8)-C(9)    | 118.1(9)  |
| N(1)-C(9)-C(4)    | 122.8(10) |
| N(1)-C(9)-C(8)    | 116.9(8)  |
| C(4)-C(9)-C(8)    | 120.3(9)  |
| C(11)-C(10)-C(7)  | 119.8(10) |
| C(10)-C(11)-C(12) | 119.9(11) |
| N(2)-C(12)-C(11)  | 120.9(10) |
| N(2)-C(12)-C(43)  | 119.9(8)  |
| C(11)-C(12)-C(43) | 119.2(10) |
| N(4)-C(13)-C(14)  | 122.0(8)  |
| N(4)-C(13)-C(34)  | 116.7(7)  |
| C(14)-C(13)-C(34) | 121.2(8)  |
| C(15)-C(14)-C(13) | 119.1(8)  |
| C(14)-C(15)-C(16) | 120.7(8)  |
| C(15)-C(16)-C(17) | 118.1(9)  |
| C(15)-C(16)-C(21) | 125.7(9)  |
| C(17)-C(16)-C(21) | 116.1(9)  |
| N(4)-C(17)-C(16)  | 120.8(8)  |
| N(4)-C(17)-C(18)  | 116.8(7)  |
| C(16)-C(17)-C(18) | 122.3(8)  |
| N(3)-C(18)-C(19)  | 122.9(8)  |
| N(3)-C(18)-C(17)  | 118.4(8)  |

|                   |           |
|-------------------|-----------|
| C(19)-C(18)-C(17) | 118.5(8)  |
| C(22)-C(19)-C(20) | 125.2(8)  |
| C(22)-C(19)-C(18) | 116.3(8)  |
| C(20)-C(19)-C(18) | 118.5(8)  |
| C(21)-C(20)-C(19) | 121.0(9)  |
| C(20)-C(21)-C(16) | 123.4(9)  |
| C(23)-C(22)-C(19) | 119.9(9)  |
| C(22)-C(23)-C(24) | 121.5(9)  |
| N(3)-C(24)-C(23)  | 120.2(8)  |
| N(3)-C(24)-C(25)  | 118.8(8)  |
| C(23)-C(24)-C(25) | 121.0(8)  |
| C(26)-C(25)-C(30) | 120.2(8)  |
| C(26)-C(25)-C(24) | 118.7(8)  |
| C(30)-C(25)-C(24) | 121.0(9)  |
| C(25)-C(26)-C(27) | 118.7(8)  |
| C(25)-C(26)-C(32) | 121.9(8)  |
| C(27)-C(26)-C(32) | 119.3(8)  |
| C(28)-C(27)-C(26) | 121.6(9)  |
| C(29)-C(28)-C(27) | 118.9(9)  |
| C(29)-C(28)-C(33) | 121.3(9)  |
| C(27)-C(28)-C(33) | 119.8(10) |
| C(28)-C(29)-C(30) | 122.0(9)  |
| C(29)-C(30)-C(25) | 118.5(9)  |
| C(29)-C(30)-C(31) | 121.1(9)  |
| C(25)-C(30)-C(31) | 120.3(9)  |
| C(39)-C(34)-C(35) | 119.6(8)  |
| C(39)-C(34)-C(13) | 119.5(8)  |
| C(35)-C(34)-C(13) | 120.9(8)  |
| C(36)-C(35)-C(34) | 118.7(8)  |
| C(36)-C(35)-C(42) | 121.0(8)  |
| C(34)-C(35)-C(42) | 120.3(8)  |
| C(37)-C(36)-C(35) | 123.2(9)  |
| C(36)-C(37)-C(38) | 116.9(9)  |
| C(36)-C(37)-C(41) | 122.6(9)  |
| C(38)-C(37)-C(41) | 120.5(9)  |
| C(39)-C(38)-C(37) | 122.9(9)  |
| C(38)-C(39)-C(34) | 118.7(8)  |
| C(38)-C(39)-C(40) | 120.8(9)  |

|                   |           |
|-------------------|-----------|
| C(34)-C(39)-C(40) | 120.4(8)  |
| C(44)-C(43)-C(48) | 118.1(10) |
| C(44)-C(43)-C(12) | 118.3(9)  |
| C(48)-C(43)-C(12) | 123.6(9)  |
| C(43)-C(44)-C(45) | 120.9(10) |
| C(46)-C(45)-C(44) | 118.9(10) |
| C(45)-C(46)-C(47) | 120.8(11) |
| C(48)-C(47)-C(46) | 121.2(11) |
| C(47)-C(48)-C(43) | 119.9(10) |
| C(47)-C(48)-N(5)  | 120.4(10) |
| C(43)-C(48)-N(5)  | 119.5(10) |
| N(5)-C(49)-N(6)   | 116.4(9)  |
| N(5)-C(49)-S(1)   | 118.1(9)  |
| N(6)-C(49)-S(1)   | 125.4(8)  |
| C(51)-C(50)-C(55) | 120.0(10) |
| C(51)-C(50)-N(6)  | 118.1(9)  |
| C(55)-C(50)-N(6)  | 121.8(10) |
| C(52)-C(51)-C(50) | 120.7(10) |
| C(51)-C(52)-C(53) | 121.1(10) |
| C(51)-C(52)-C(57) | 123.6(12) |
| C(53)-C(52)-C(57) | 115.4(12) |
| C(54)-C(53)-C(52) | 118.3(10) |
| C(55)-C(54)-C(53) | 121.5(10) |
| C(55)-C(54)-C(56) | 118.3(10) |
| C(53)-C(54)-C(56) | 120.1(10) |
| C(54)-C(55)-C(50) | 118.4(10) |
| F(3)-C(56)-F(1)   | 107.0(10) |
| F(3)-C(56)-F(2)   | 107.1(10) |
| F(1)-C(56)-F(2)   | 106.0(10) |
| F(3)-C(56)-C(54)  | 111.8(10) |
| F(1)-C(56)-C(54)  | 112.6(9)  |
| F(2)-C(56)-C(54)  | 112.0(10) |
| F(5)-C(57)-F(6)   | 116(3)    |
| F(5)-C(57)-F(4)   | 102(3)    |
| F(6)-C(57)-F(4)   | 101(3)    |
| F(6')-C(57)-F(5') | 122(4)    |
| F(6')-C(57)-F(4') | 109(3)    |
| F(5')-C(57)-F(4') | 87(4)     |

|                    |           |
|--------------------|-----------|
| F(5)-C(57)-C(52)   | 115.4(18) |
| F(6)-C(57)-C(52)   | 114.9(16) |
| F(6')-C(57)-C(52)  | 117.6(19) |
| F(4)-C(57)-C(52)   | 105(2)    |
| F(5')-C(57)-C(52)  | 108(2)    |
| F(4')-C(57)-C(52)  | 108.4(19) |
| N(1)-Cu(1)-N(3)    | 141.5(3)  |
| N(1)-Cu(1)-N(4)    | 115.8(3)  |
| N(3)-Cu(1)-N(4)    | 81.3(3)   |
| N(1)-Cu(1)-N(2)    | 81.8(3)   |
| N(3)-Cu(1)-N(2)    | 129.0(3)  |
| N(4)-Cu(1)-N(2)    | 105.4(3)  |
| C(1)-N(1)-C(9)     | 116.5(8)  |
| C(1)-N(1)-Cu(1)    | 130.2(6)  |
| C(9)-N(1)-Cu(1)    | 112.7(6)  |
| C(12)-N(2)-C(8)    | 118.9(8)  |
| C(12)-N(2)-Cu(1)   | 133.7(7)  |
| C(8)-N(2)-Cu(1)    | 106.4(6)  |
| C(24)-N(3)-C(18)   | 119.1(7)  |
| C(24)-N(3)-Cu(1)   | 128.0(6)  |
| C(18)-N(3)-Cu(1)   | 112.7(5)  |
| C(13)-N(4)-C(17)   | 119.3(7)  |
| C(13)-N(4)-Cu(1)   | 131.6(6)  |
| C(17)-N(4)-Cu(1)   | 108.6(5)  |
| C(49)-N(5)-C(48)   | 127.8(9)  |
| C(49)-N(6)-C(50)   | 132.1(9)  |
| F(8)-Cl(1)-F(9)    | 91.1(11)  |
| F(8)-Cl(1)-F(10)   | 174.9(7)  |
| F(9)-Cl(1)-F(10)   | 91.0(10)  |
| F(8)-Cl(1)-F(11)   | 89.8(5)   |
| F(7')-Cl(1)-F(11)  | 99.1(10)  |
| F(9)-Cl(1)-F(11)   | 90.4(6)   |
| F(10)-Cl(1)-F(11)  | 85.6(5)   |
| F(7'')-Cl(1)-F(9') | 170.2(13) |
| F(11)-Cl(1)-F(9')  | 90.7(7)   |
| F(8)-Cl(1)-F(7)    | 90.4(11)  |
| F(9)-Cl(1)-F(7)    | 175.5(8)  |
| F(10)-Cl(1)-F(7)   | 87.1(8)   |



|                    |           |
|--------------------|-----------|
| F(11)-Cl(1)-F(7)   | 85.4(7)   |
| F(8)-Cl(1)-F(12)   | 90.5(5)   |
| F(7')-Cl(1)-F(12)  | 81.3(10)  |
| F(9)-Cl(1)-F(12)   | 88.9(6)   |
| F(10)-Cl(1)-F(12)  | 94.1(5)   |
| F(11)-Cl(1)-F(12)  | 179.2(5)  |
| F(9')-Cl(1)-F(12)  | 89.0(7)   |
| F(7)-Cl(1)-F(12)   | 95.4(7)   |
| F(7')-Cl(1)-F(10') | 91.5(17)  |
| F(11)-Cl(1)-F(10') | 93.5(8)   |
| F(9')-Cl(1)-F(10') | 88.6(15)  |
| F(12)-Cl(1)-F(10') | 85.7(8)   |
| F(7')-Cl(1)-F(8')  | 90.0(17)  |
| F(11)-Cl(1)-F(8')  | 96.2(11)  |
| F(9')-Cl(1)-F(8')  | 88.3(14)  |
| F(12)-Cl(1)-F(8')  | 84.6(11)  |
| F(10')-Cl(1)-F(8') | 169.9(15) |

**Table S11.** Anisotropic displacement parameters ( $\text{\AA}^2 \times 10^3$ ) for  $[\text{Cu}(\mathbf{1})(\mathbf{3})]\text{PF}_6$ . The anisotropic displacement factor exponent takes the form:  $-2 \sum_{i,j} h^i k^j a^i b^j U^{ij}$  ]

|       | U11   | U22   | U33     | U23    | U13    | U12    |
|-------|-------|-------|---------|--------|--------|--------|
| C(1)  | 36(6) | 51(6) | 62(7)   | -16(6) | -4(5)  | -24(5) |
| C(2)  | 58(7) | 82(8) | 50(7)   | 20(6)  | -16(6) | -46(7) |
| C(3)  | 42(6) | 47(7) | 101(10) | 30(7)  | -32(7) | -29(6) |
| C(4)  | 42(6) | 46(7) | 74(8)   | 7(6)   | -6(6)  | -23(5) |
| C(5)  | 40(7) | 36(7) | 125(12) | 15(7)  | -23(7) | -19(6) |
| C(6)  | 37(7) | 32(6) | 140(12) | -9(8)  | -16(8) | -14(5) |
| C(7)  | 30(6) | 41(6) | 99(9)   | -18(7) | -7(6)  | -16(5) |
| C(8)  | 20(5) | 37(6) | 78(8)   | -8(6)  | -8(5)  | -15(4) |
| C(9)  | 27(5) | 26(5) | 72(8)   | 11(5)  | -9(5)  | -15(4) |
| C(10) | 35(6) | 50(7) | 118(11) | -34(8) | 6(7)   | -20(6) |
| C(11) | 46(7) | 60(7) | 96(9)   | -30(7) | 9(7)   | -29(6) |

|       |         |         |        |        |        |        |
|-------|---------|---------|--------|--------|--------|--------|
| C(12) | 32(6)   | 46(6)   | 67(8)  | -19(6) | 4(5)   | -15(5) |
| C(13) | 32(5)   | 40(5)   | 39(6)  | -9(4)  | -5(4)  | -10(4) |
| C(14) | 36(6)   | 61(7)   | 55(7)  | -15(5) | 1(5)   | -29(5) |
| C(15) | 63(8)   | 55(7)   | 67(8)  | -10(6) | 4(6)   | -41(6) |
| C(16) | 50(6)   | 38(6)   | 48(6)  | -8(5)  | 5(5)   | -21(5) |
| C(17) | 48(6)   | 31(5)   | 38(6)  | -11(4) | 8(5)   | -16(5) |
| C(18) | 40(6)   | 33(5)   | 43(6)  | -4(4)  | -1(5)  | -16(5) |
| C(19) | 45(6)   | 27(5)   | 49(6)  | -1(4)  | -8(5)  | -11(5) |
| C(20) | 68(8)   | 38(6)   | 46(6)  | 5(5)   | -1(6)  | -24(6) |
| C(21) | 64(7)   | 40(6)   | 55(7)  | -8(5)  | 9(6)   | -20(6) |
| C(22) | 61(7)   | 38(6)   | 49(7)  | 12(5)  | -7(5)  | -16(5) |
| C(23) | 35(5)   | 41(6)   | 54(6)  | -4(5)  | -6(5)  | -7(5)  |
| C(24) | 38(6)   | 44(6)   | 52(6)  | -10(5) | -4(5)  | -15(5) |
| C(25) | 34(5)   | 26(5)   | 53(7)  | -3(4)  | 1(5)   | -7(4)  |
| C(26) | 31(5)   | 34(5)   | 48(7)  | -1(4)  | -10(5) | -11(4) |
| C(27) | 31(5)   | 39(5)   | 57(7)  | 1(5)   | -2(5)  | -8(5)  |
| C(28) | 36(6)   | 25(5)   | 83(9)  | -7(5)  | -11(6) | -7(4)  |
| C(29) | 32(6)   | 37(6)   | 93(9)  | -23(6) | -7(6)  | -8(5)  |
| C(30) | 46(6)   | 42(6)   | 53(7)  | -15(5) | -6(5)  | -10(5) |
| C(31) | 81(8)   | 76(8)   | 71(8)  | -27(6) | 2(7)   | -41(7) |
| C(32) | 45(6)   | 42(5)   | 56(6)  | -10(5) | -3(5)  | -21(5) |
| C(33) | 47(6)   | 46(6)   | 102(9) | -2(6)  | 5(6)   | -21(5) |
| C(34) | 36(5)   | 41(6)   | 42(6)  | -5(5)  | -7(5)  | -21(5) |
| C(35) | 35(5)   | 41(6)   | 45(6)  | -13(5) | 3(5)   | -16(5) |
| C(36) | 34(5)   | 35(5)   | 60(7)  | -5(5)  | -7(5)  | -14(4) |
| C(37) | 35(5)   | 40(6)   | 58(7)  | 0(5)   | -11(5) | -23(5) |
| C(38) | 39(6)   | 56(7)   | 50(6)  | -7(5)  | -6(5)  | -32(5) |
| C(39) | 30(5)   | 36(5)   | 52(7)  | -13(5) | -5(5)  | -18(4) |
| C(40) | 58(7)   | 50(6)   | 57(7)  | -16(5) | 3(5)   | -24(5) |
| C(41) | 44(6)   | 66(7)   | 72(8)  | 6(6)   | -10(6) | -21(5) |
| C(42) | 44(6)   | 49(6)   | 66(8)  | -11(5) | -4(5)  | -17(5) |
| C(43) | 49(6)   | 51(7)   | 54(7)  | -21(6) | 9(5)   | -13(5) |
| C(44) | 76(8)   | 65(7)   | 54(7)  | -25(6) | -5(6)  | -29(6) |
| C(45) | 105(10) | 60(8)   | 61(8)  | -20(7) | 8(7)   | -33(7) |
| C(46) | 99(10)  | 67(8)   | 61(8)  | -10(6) | -15(7) | -29(7) |
| C(47) | 90(9)   | 104(10) | 48(8)  | -13(7) | -6(7)  | -50(8) |
| C(48) | 56(7)   | 73(8)   | 54(7)  | -23(6) | 3(6)   | -30(6) |
| C(49) | 65(8)   | 76(8)   | 74(8)  | -16(6) | -15(7) | -35(7) |

|        |         |         |         |         |         |          |
|--------|---------|---------|---------|---------|---------|----------|
| C(50)  | 62(7)   | 56(7)   | 54(7)   | -8(5)   | -7(6)   | -29(6)   |
| C(51)  | 64(8)   | 44(6)   | 62(7)   | -1(5)   | -12(6)  | -19(6)   |
| C(52)  | 71(8)   | 52(7)   | 56(7)   | -12(6)  | 17(6)   | -15(6)   |
| C(53)  | 64(7)   | 61(7)   | 55(7)   | -10(6)  | 1(6)    | -18(6)   |
| C(54)  | 54(7)   | 54(7)   | 69(8)   | -12(6)  | 5(6)    | -25(6)   |
| C(55)  | 64(7)   | 43(6)   | 60(7)   | -7(5)   | 2(6)    | -18(6)   |
| C(56)  | 70(9)   | 58(8)   | 72(9)   | -20(7)  | 6(7)    | -20(7)   |
| C(57)  | 124(16) | 63(10)  | 63(12)  | 4(9)    | -1(12)  | -39(10)  |
| Cu(1)  | 42(1)   | 32(1)   | 62(1)   | -2(1)   | -5(1)   | -13(1)   |
| F(1)   | 168(8)  | 94(5)   | 74(5)   | -13(4)  | 15(5)   | -78(5)   |
| F(2)   | 111(6)  | 102(6)  | 155(7)  | 0(5)    | -33(6)  | -66(5)   |
| F(3)   | 107(6)  | 63(5)   | 140(7)  | -23(4)  | 27(5)   | -38(4)   |
| F(11)  | 124(6)  | 77(5)   | 121(6)  | 45(4)   | -63(5)  | -56(4)   |
| F(12)  | 81(4)   | 38(3)   | 107(5)  | 7(3)    | -10(4)  | -17(3)   |
| N(1)   | 32(4)   | 36(5)   | 59(6)   | -4(4)   | -6(4)   | -15(4)   |
| N(2)   | 32(4)   | 50(5)   | 57(6)   | -16(5)  | -6(4)   | -15(4)   |
| N(3)   | 43(5)   | 33(4)   | 35(4)   | -4(3)   | -6(4)   | -18(4)   |
| N(4)   | 35(4)   | 32(4)   | 42(5)   | -8(4)   | 0(4)    | -14(4)   |
| N(5)   | 61(6)   | 63(6)   | 97(8)   | -21(5)  | -11(5)  | -27(5)   |
| N(6)   | 63(6)   | 61(6)   | 90(7)   | -25(5)  | -1(5)   | -27(5)   |
| S(1)   | 78(2)   | 67(2)   | 148(3)  | -42(2)  | 15(2)   | -35(2)   |
| Cl(1)  | 83(2)   | 71(2)   | 86(2)   | -3(2)   | -13(2)  | -41(2)   |
| F(4)   | 170(30) | 180(30) | 250(60) | 110(40) | -30(40) | 10(20)   |
| F(5)   | 130(30) | 200(30) | 110(18) | -85(17) | -74(18) | 80(20)   |
| F(6)   | 128(17) | 81(17)  | 72(14)  | 17(12)  | 31(13)  | 38(12)   |
| F(7)   | 90(12)  | 128(13) | 52(9)   | -23(8)  | -6(8)   | -33(9)   |
| F(8)   | 48(10)  | 96(13)  | 140(20) | 53(13)  | -38(12) | -42(10)  |
| F(9)   | 150(20) | 75(9)   | 60(10)  | -24(7)  | -39(14) | -12(12)  |
| F(10)  | 39(7)   | 74(9)   | 86(13)  | 9(8)    | 9(7)    | -28(6)   |
| F(4')  | 84(17)  | 98(17)  | 56(17)  | 52(15)  | -25(14) | -8(13)   |
| F(5')  | 270(60) | 60(20)  | 110(30) | -30(20) | -10(30) | -10(20)  |
| F(6')  | 38(15)  | 82(16)  | 360(70) | -20(30) | -40(30) | -18(13)  |
| F(7')  | 240(40) | 160(20) | 90(20)  | -5(17)  | -30(20) | -170(30) |
| F(8')  | 180(40) | 180(30) | 90(20)  | -79(18) | 110(20) | -100(20) |
| F(9')  | 88(19)  | 58(11)  | 95(19)  | -22(11) | -21(15) | -45(13)  |
| F(10') | 76(18)  | 97(18)  | 110(30) | 0(17)   | 58(19)  | 3(13)    |

**Table S12.** Hydrogen coordinates ( $\times 10^4$ ) and isotropic displacement parameters ( $\text{\AA}^2 \times 10^3$ ) for  $[\text{Cu}(\mathbf{1})(\mathbf{3})]\text{PF}_6$ .

|        | x     | y     | z     | U(eq) |
|--------|-------|-------|-------|-------|
| H(1)   | 6042  | 7139  | -921  | 55    |
| H(2)   | 5325  | 8344  | -2184 | 72    |
| H(3)   | 4058  | 9954  | -1942 | 75    |
| H(5)   | 2938  | 11162 | -860  | 80    |
| H(6)   | 2409  | 11449 | 592   | 82    |
| H(10)  | 2571  | 10861 | 2270  | 78    |
| H(11)  | 3495  | 9625  | 3442  | 76    |
| H(14)  | 1978  | 6127  | 1644  | 56    |
| H(15)  | 2882  | 4662  | 2617  | 67    |
| H(20)  | 6586  | 2916  | 3506  | 62    |
| H(21)  | 4714  | 3405  | 3332  | 64    |
| H(22)  | 8406  | 3243  | 3082  | 63    |
| H(23)  | 9233  | 4271  | 2273  | 56    |
| H(27)  | 9155  | 6487  | -920  | 54    |
| H(29)  | 9690  | 7430  | 1288  | 65    |
| H(31A) | 8710  | 7183  | 2720  | 107   |
| H(31B) | 9281  | 5982  | 2893  | 107   |
| H(31C) | 7939  | 6547  | 2808  | 107   |
| H(32A) | 8468  | 4628  | 20    | 69    |
| H(32B) | 8191  | 5451  | -870  | 69    |
| H(32C) | 7244  | 5526  | -73   | 69    |
| H(33A) | 9732  | 8340  | -446  | 98    |
| H(33B) | 10142 | 7510  | -1122 | 98    |
| H(33C) | 10895 | 7379  | -283  | 98    |
| H(36)  | 1098  | 9738  | 486   | 51    |
| H(38)  | 2757  | 8115  | -1494 | 53    |
| H(40A) | 4629  | 6127  | -242  | 81    |
| H(40B) | 4046  | 6460  | -1207 | 81    |
| H(40C) | 3586  | 5847  | -390  | 81    |
| H(41A) | 979   | 10582 | -1030 | 93    |

|        |       |       |       |    |
|--------|-------|-------|-------|----|
| H(41B) | 757   | 9880  | -1637 | 93 |
| H(41C) | 1923  | 10036 | -1764 | 93 |
| H(42A) | 1429  | 9103  | 2014  | 79 |
| H(42B) | 2478  | 8064  | 2277  | 79 |
| H(42C) | 1260  | 8066  | 2151  | 79 |
| H(44)  | 4787  | 6732  | 3081  | 75 |
| H(45)  | 5874  | 5477  | 4224  | 89 |
| H(46)  | 6832  | 5891  | 5198  | 91 |
| H(47)  | 6711  | 7515  | 5095  | 92 |
| H(51)  | 9472  | 7249  | 4344  | 69 |
| H(53)  | 11536 | 8731  | 4118  | 75 |
| H(55)  | 8224  | 10270 | 3579  | 69 |
| H(5A)  | 5023  | 9575  | 3846  | 85 |
| H(6A)  | 7651  | 8137  | 3775  | 83 |

**Table S13.** Torsion angles [°] for [Cu(1)(3)]PF<sub>6</sub>.

|                      |           |
|----------------------|-----------|
| N(1)-C(1)-C(2)-C(3)  | 0.8(13)   |
| C(1)-C(2)-C(3)-C(4)  | -0.5(13)  |
| C(2)-C(3)-C(4)-C(9)  | 0.1(13)   |
| C(2)-C(3)-C(4)-C(5)  | -179.4(8) |
| C(9)-C(4)-C(5)-C(6)  | -0.7(14)  |
| C(3)-C(4)-C(5)-C(6)  | 178.9(9)  |
| C(4)-C(5)-C(6)-C(7)  | 1.6(15)   |
| C(5)-C(6)-C(7)-C(10) | 177.0(10) |
| C(5)-C(6)-C(7)-C(8)  | -0.1(14)  |
| C(10)-C(7)-C(8)-N(2) | -2.8(12)  |
| C(6)-C(7)-C(8)-N(2)  | 174.5(8)  |
| C(10)-C(7)-C(8)-C(9) | -179.7(8) |
| C(6)-C(7)-C(8)-C(9)  | -2.4(12)  |
| C(3)-C(4)-C(9)-N(1)  | 0.0(13)   |
| C(5)-C(4)-C(9)-N(1)  | 179.6(8)  |
| C(3)-C(4)-C(9)-C(8)  | 178.6(8)  |
| C(5)-C(4)-C(9)-C(8)  | -1.8(12)  |
| N(2)-C(8)-C(9)-N(1)  | 5.0(11)   |
| C(7)-C(8)-C(9)-N(1)  | -178.0(7) |
| N(2)-C(8)-C(9)-C(4)  | -173.7(7) |

|                         |           |
|-------------------------|-----------|
| C(7)-C(8)-C(9)-C(4)     | 3.3(11)   |
| C(8)-C(7)-C(10)-C(11)   | 3.2(13)   |
| C(6)-C(7)-C(10)-C(11)   | -173.9(9) |
| C(7)-C(10)-C(11)-C(12)  | 0.7(14)   |
| C(10)-C(11)-C(12)-N(2)  | -5.6(13)  |
| C(10)-C(11)-C(12)-C(43) | 174.5(8)  |
| N(4)-C(13)-C(14)-C(15)  | -0.3(13)  |
| C(34)-C(13)-C(14)-C(15) | 175.0(8)  |
| C(13)-C(14)-C(15)-C(16) | -1.0(14)  |
| C(14)-C(15)-C(16)-C(17) | 1.4(14)   |
| C(14)-C(15)-C(16)-C(21) | -176.6(9) |
| C(15)-C(16)-C(17)-N(4)  | -0.6(13)  |
| C(21)-C(16)-C(17)-N(4)  | 177.6(8)  |
| C(15)-C(16)-C(17)-C(18) | -177.4(8) |
| C(21)-C(16)-C(17)-C(18) | 0.8(13)   |
| N(4)-C(17)-C(18)-N(3)   | 0.8(11)   |
| C(16)-C(17)-C(18)-N(3)  | 177.8(8)  |
| N(4)-C(17)-C(18)-C(19)  | -175.4(7) |
| C(16)-C(17)-C(18)-C(19) | 1.6(13)   |
| N(3)-C(18)-C(19)-C(22)  | 0.9(13)   |
| C(17)-C(18)-C(19)-C(22) | 176.9(8)  |
| N(3)-C(18)-C(19)-C(20)  | -179.5(8) |
| C(17)-C(18)-C(19)-C(20) | -3.5(12)  |
| C(22)-C(19)-C(20)-C(21) | -177.3(9) |
| C(18)-C(19)-C(20)-C(21) | 3.1(14)   |
| C(19)-C(20)-C(21)-C(16) | -0.7(15)  |
| C(15)-C(16)-C(21)-C(20) | 176.8(10) |
| C(17)-C(16)-C(21)-C(20) | -1.3(14)  |
| C(20)-C(19)-C(22)-C(23) | 178.1(9)  |
| C(18)-C(19)-C(22)-C(23) | -2.4(13)  |
| C(19)-C(22)-C(23)-C(24) | 1.0(14)   |
| C(22)-C(23)-C(24)-N(3)  | 2.2(14)   |
| C(22)-C(23)-C(24)-C(25) | -175.8(9) |
| N(3)-C(24)-C(25)-C(26)  | -75.5(11) |
| C(23)-C(24)-C(25)-C(26) | 102.5(10) |
| N(3)-C(24)-C(25)-C(30)  | 109.7(10) |
| C(23)-C(24)-C(25)-C(30) | -72.3(11) |
| C(30)-C(25)-C(26)-C(27) | -0.4(12)  |

|                         |            |
|-------------------------|------------|
| C(24)-C(25)-C(26)-C(27) | -175.2(8)  |
| C(30)-C(25)-C(26)-C(32) | 175.3(8)   |
| C(24)-C(25)-C(26)-C(32) | 0.5(12)    |
| C(25)-C(26)-C(27)-C(28) | -0.9(12)   |
| C(32)-C(26)-C(27)-C(28) | -176.7(8)  |
| C(26)-C(27)-C(28)-C(29) | 1.7(13)    |
| C(26)-C(27)-C(28)-C(33) | -179.8(8)  |
| C(27)-C(28)-C(29)-C(30) | -1.2(14)   |
| C(33)-C(28)-C(29)-C(30) | -179.7(8)  |
| C(28)-C(29)-C(30)-C(25) | -0.1(13)   |
| C(28)-C(29)-C(30)-C(31) | -179.3(9)  |
| C(26)-C(25)-C(30)-C(29) | 0.9(13)    |
| C(24)-C(25)-C(30)-C(29) | 175.6(8)   |
| C(26)-C(25)-C(30)-C(31) | -179.8(8)  |
| C(24)-C(25)-C(30)-C(31) | -5.2(13)   |
| N(4)-C(13)-C(34)-C(39)  | 73.7(10)   |
| C(14)-C(13)-C(34)-C(39) | -101.9(10) |
| N(4)-C(13)-C(34)-C(35)  | -107.0(9)  |
| C(14)-C(13)-C(34)-C(35) | 77.5(11)   |
| C(39)-C(34)-C(35)-C(36) | -0.2(12)   |
| C(13)-C(34)-C(35)-C(36) | -179.6(7)  |
| C(39)-C(34)-C(35)-C(42) | -179.5(7)  |
| C(13)-C(34)-C(35)-C(42) | 1.1(12)    |
| C(34)-C(35)-C(36)-C(37) | 0.6(12)    |
| C(42)-C(35)-C(36)-C(37) | 179.8(8)   |
| C(35)-C(36)-C(37)-C(38) | 0.2(12)    |
| C(35)-C(36)-C(37)-C(41) | 179.7(8)   |
| C(36)-C(37)-C(38)-C(39) | -1.4(12)   |
| C(41)-C(37)-C(38)-C(39) | 179.1(7)   |
| C(37)-C(38)-C(39)-C(34) | 1.8(12)    |
| C(37)-C(38)-C(39)-C(40) | -179.4(7)  |
| C(35)-C(34)-C(39)-C(38) | -0.9(11)   |
| C(13)-C(34)-C(39)-C(38) | 178.5(7)   |
| C(35)-C(34)-C(39)-C(40) | -179.8(7)  |
| C(13)-C(34)-C(39)-C(40) | -0.4(11)   |
| N(2)-C(12)-C(43)-C(44)  | -55.0(13)  |
| C(11)-C(12)-C(43)-C(44) | 125.0(10)  |
| N(2)-C(12)-C(43)-C(48)  | 126.0(10)  |

|                         |            |
|-------------------------|------------|
| C(11)-C(12)-C(43)-C(48) | -54.0(13)  |
| C(48)-C(43)-C(44)-C(45) | -2.4(15)   |
| C(12)-C(43)-C(44)-C(45) | 178.5(9)   |
| C(43)-C(44)-C(45)-C(46) | 2.2(17)    |
| C(44)-C(45)-C(46)-C(47) | 0.7(18)    |
| C(45)-C(46)-C(47)-C(48) | -3.3(19)   |
| C(46)-C(47)-C(48)-C(43) | 2.9(17)    |
| C(46)-C(47)-C(48)-N(5)  | 178.2(10)  |
| C(44)-C(43)-C(48)-C(47) | -0.1(15)   |
| C(12)-C(43)-C(48)-C(47) | 178.9(10)  |
| C(44)-C(43)-C(48)-N(5)  | -175.4(9)  |
| C(12)-C(43)-C(48)-N(5)  | 3.7(15)    |
| C(55)-C(50)-C(51)-C(52) | 0.2(15)    |
| N(6)-C(50)-C(51)-C(52)  | 178.4(9)   |
| C(50)-C(51)-C(52)-C(53) | 1.2(16)    |
| C(50)-C(51)-C(52)-C(57) | -177.3(12) |
| C(51)-C(52)-C(53)-C(54) | -1.9(16)   |
| C(57)-C(52)-C(53)-C(54) | 176.7(12)  |
| C(52)-C(53)-C(54)-C(55) | 1.3(16)    |
| C(52)-C(53)-C(54)-C(56) | -176.2(10) |
| C(53)-C(54)-C(55)-C(50) | 0.1(15)    |
| C(56)-C(54)-C(55)-C(50) | 177.6(9)   |
| C(51)-C(50)-C(55)-C(54) | -0.8(15)   |
| N(6)-C(50)-C(55)-C(54)  | -178.9(9)  |
| C(55)-C(54)-C(56)-F(3)  | 36.6(15)   |
| C(53)-C(54)-C(56)-F(3)  | -145.8(11) |
| C(55)-C(54)-C(56)-F(1)  | -83.8(13)  |
| C(53)-C(54)-C(56)-F(1)  | 93.8(13)   |
| C(55)-C(54)-C(56)-F(2)  | 156.8(10)  |
| C(53)-C(54)-C(56)-F(2)  | -25.6(15)  |
| C(51)-C(52)-C(57)-F(5)  | -110(4)    |
| C(53)-C(52)-C(57)-F(5)  | 72(4)      |
| C(51)-C(52)-C(57)-F(6)  | 112(3)     |
| C(53)-C(52)-C(57)-F(6)  | -67(3)     |
| C(51)-C(52)-C(57)-F(6') | -163(4)    |
| C(53)-C(52)-C(57)-F(6') | 18(5)      |
| C(51)-C(52)-C(57)-F(4)  | 2(4)       |
| C(53)-C(52)-C(57)-F(4)  | -177(4)    |



|                         |            |
|-------------------------|------------|
| C(51)-C(52)-C(57)-F(5') | 55(5)      |
| C(53)-C(52)-C(57)-F(5') | -124(4)    |
| C(51)-C(52)-C(57)-F(4') | -39(3)     |
| C(53)-C(52)-C(57)-F(4') | 143(2)     |
| C(2)-C(1)-N(1)-C(9)     | -0.6(12)   |
| C(2)-C(1)-N(1)-Cu(1)    | 169.3(6)   |
| C(4)-C(9)-N(1)-C(1)     | 0.3(11)    |
| C(8)-C(9)-N(1)-C(1)     | -178.4(7)  |
| C(4)-C(9)-N(1)-Cu(1)    | -171.5(6)  |
| C(8)-C(9)-N(1)-Cu(1)    | 9.9(9)     |
| C(11)-C(12)-N(2)-C(8)   | 6.0(12)    |
| C(43)-C(12)-N(2)-C(8)   | -174.0(8)  |
| C(11)-C(12)-N(2)-Cu(1)  | -160.2(6)  |
| C(43)-C(12)-N(2)-Cu(1)  | 19.8(13)   |
| C(7)-C(8)-N(2)-C(12)    | -1.9(12)   |
| C(9)-C(8)-N(2)-C(12)    | 175.0(7)   |
| C(7)-C(8)-N(2)-Cu(1)    | 167.7(6)   |
| C(9)-C(8)-N(2)-Cu(1)    | -15.4(8)   |
| C(23)-C(24)-N(3)-C(18)  | -3.7(12)   |
| C(25)-C(24)-N(3)-C(18)  | 174.4(7)   |
| C(23)-C(24)-N(3)-Cu(1)  | 171.1(6)   |
| C(25)-C(24)-N(3)-Cu(1)  | -10.9(12)  |
| C(19)-C(18)-N(3)-C(24)  | 2.2(12)    |
| C(17)-C(18)-N(3)-C(24)  | -173.8(8)  |
| C(19)-C(18)-N(3)-Cu(1)  | -173.4(7)  |
| C(17)-C(18)-N(3)-Cu(1)  | 10.6(9)    |
| C(14)-C(13)-N(4)-C(17)  | 1.2(12)    |
| C(34)-C(13)-N(4)-C(17)  | -174.3(7)  |
| C(14)-C(13)-N(4)-Cu(1)  | -169.9(6)  |
| C(34)-C(13)-N(4)-Cu(1)  | 14.7(11)   |
| C(16)-C(17)-N(4)-C(13)  | -0.7(12)   |
| C(18)-C(17)-N(4)-C(13)  | 176.3(7)   |
| C(16)-C(17)-N(4)-Cu(1)  | 172.2(6)   |
| C(18)-C(17)-N(4)-Cu(1)  | -10.8(9)   |
| N(6)-C(49)-N(5)-C(48)   | 17.1(16)   |
| S(1)-C(49)-N(5)-C(48)   | -166.2(8)  |
| C(47)-C(48)-N(5)-C(49)  | 46.9(16)   |
| C(43)-C(48)-N(5)-C(49)  | -137.9(11) |

|                        |            |
|------------------------|------------|
| N(5)-C(49)-N(6)-C(50)  | -177.8(10) |
| S(1)-C(49)-N(6)-C(50)  | 5.8(18)    |
| C(51)-C(50)-N(6)-C(49) | 152.7(11)  |
| C(55)-C(50)-N(6)-C(49) | -29.2(17)  |

**Table S14.** Hydrogen bonds for [Cu(1)(3)]PF<sub>6</sub> [Å and °].

| D-H...A                            | d(D-H) | d(H...A) | d(D...A)  | <(DHA) |
|------------------------------------|--------|----------|-----------|--------|
| C(2)-H(2)...F(10' <sup>b</sup> )#1 | 0.95   | 2.44     | 3.01(2)   | 118.4  |
| C(23)-H(23)...F(12)#2              | 0.95   | 2.47     | 3.390(11) | 164.4  |
| C(23)-H(23)...F(8 <sup>a</sup> )#2 | 0.95   | 2.49     | 3.158(14) | 127.6  |
| C(47)-H(47)...F(7 <sup>a</sup> )   | 0.95   | 2.45     | 3.162(19) | 131.9  |
| C(47)-H(47)...F(10 <sup>a</sup> )  | 0.95   | 2.57     | 3.31(2)   | 134.6  |
| C(47)-H(47)...F(7' <sup>b</sup> )  | 0.95   | 2.34     | 3.00(3)   | 126.2  |
| C(51)-H(51)...F(7 <sup>a</sup> )   | 0.95   | 2.62     | 3.30(2)   | 128.7  |
| C(55)-H(55)...S(1)                 | 0.95   | 2.56     | 3.165(11) | 121.9  |

Symmetry transformations used to generate equivalent atoms:

#1 x,y,z-1 #2 -x+2,-y+1,-z+1

**Table S15.** Crystal data and structure refinement for **1a**.

|                      |                                                                 |                  |
|----------------------|-----------------------------------------------------------------|------------------|
| Identification code  | shelx                                                           |                  |
| Empirical formula    | C <sub>19</sub> H <sub>18</sub> F <sub>6</sub> N <sub>2</sub> S |                  |
| Formula weight       | 420.41                                                          |                  |
| Temperature          | 140(2) K                                                        |                  |
| Wavelength           | 0.71073 Å                                                       |                  |
| Crystal system       | Monoclinic                                                      |                  |
| Space group          | P 21/c                                                          |                  |
| Unit cell dimensions | a = 8.3638(13) Å                                                | α = 90°.         |
|                      | b = 28.079(4) Å                                                 | β = 103.956(5)°. |
|                      | c = 8.3943(13) Å                                                | γ = 90°.         |
| Volume               | 1913.2(5) Å <sup>3</sup>                                        |                  |
| Z                    | 4                                                               |                  |
| Density (calculated) | 1.460 Mg/m <sup>3</sup>                                         |                  |

|                                   |                                             |
|-----------------------------------|---------------------------------------------|
| Absorption coefficient            | 0.232 mm <sup>-1</sup>                      |
| F(000)                            | 864                                         |
| Crystal size                      | 0.068 x 0.048 x 0.035 mm <sup>3</sup>       |
| Theta range for data collection   | 2.509 to 24.995°.                           |
| Index ranges                      | -9<=h<=9, -33<=k<=33, -9<=l<=9              |
| Reflections collected             | 42523                                       |
| Independent reflections           | 3345 [R(int) = 0.0546]                      |
| Completeness to theta = 24.995°   | 99.9 %                                      |
| Absorption correction             | Semi-empirical from equivalents             |
| Max. and min. transmission        | 0.992 and 0.984                             |
| Refinement method                 | Full-matrix least-squares on F <sup>2</sup> |
| Data / restraints / parameters    | 3345 / 126 / 311                            |
| Goodness-of-fit on F <sup>2</sup> | 1.118                                       |
| Final R indices [I>2sigma(I)]     | R1 = 0.0440, wR2 = 0.0873                   |
| R indices (all data)              | R1 = 0.0584, wR2 = 0.0949                   |
| Extinction coefficient            | n/a                                         |
| Largest diff. peak and hole       | 0.446 and -0.322 e.Å <sup>-3</sup>          |

**Table S16.** Atomic coordinates ( $\times 10^4$ ) and equivalent isotropic displacement parameters ( $\text{\AA}^2 \times 10^3$ ) for **1a**.  $U(\text{eq})$  is defined as one third of the trace of the orthogonalized  $U_{ij}$  tensor.

|       | x         | y       | z        | U(eq)  |
|-------|-----------|---------|----------|--------|
| C(1)  | 4370(3)   | 4248(1) | 8680(3)  | 23(1)  |
| C(2)  | 6302(3)   | 4482(1) | 6996(3)  | 23(1)  |
| C(3)  | 7990(3)   | 4536(1) | 7479(3)  | 25(1)  |
| C(4)  | 8948(3)   | 4434(1) | 6387(3)  | 24(1)  |
| C(5)  | 8260(3)   | 4271(1) | 4805(3)  | 22(1)  |
| C(6)  | 6548(3)   | 4234(1) | 4329(3)  | 28(1)  |
| C(7)  | 5581(3)   | 4342(1) | 5402(3)  | 29(1)  |
| C(8)  | 9291(3)   | 4115(1) | 3619(3)  | 26(1)  |
| C(9)  | 9118(3)   | 3573(1) | 3394(3)  | 40(1)  |
| C(10) | 8683(3)   | 4359(1) | 1950(3)  | 35(1)  |
| C(11) | 11119(3)  | 4232(1) | 4266(3)  | 34(1)  |
| C(12) | 3493(3)   | 3393(1) | 8305(3)  | 22(1)  |
| C(13) | 4279(3)   | 2956(1) | 8364(3)  | 24(1)  |
| C(14) | 3440(3)   | 2540(1) | 8533(3)  | 26(1)  |
| C(15) | 1825(3)   | 2554(1) | 8654(3)  | 27(1)  |
| C(16) | 1046(3)   | 2993(1) | 8580(3)  | 24(1)  |
| C(17) | 1858(3)   | 3413(1) | 8393(3)  | 24(1)  |
| C(18) | -721(3)   | 3008(1) | 8653(3)  | 35(1)  |
| C(19) | 4311(3)   | 2070(1) | 8589(3)  | 35(1)  |
| N(1)  | 5312(2)   | 4570(1) | 8139(2)  | 26(1)  |
| N(2)  | 4384(2)   | 3802(1) | 8039(2)  | 26(1)  |
| S(1)  | 3311(1)   | 4394(1) | 10075(1) | 27(1)  |
| F(1)  | 3550(5)   | 1723(1) | 9197(9)  | 89(2)  |
| F(2)  | 5774(5)   | 2078(1) | 9734(6)  | 76(2)  |
| F(3)  | 4639(9)   | 1946(2) | 7284(5)  | 102(3) |
| F(4)  | -1336(6)  | 3429(1) | 8686(10) | 92(2)  |
| F(5)  | -921(5)   | 2796(2) | 10051(5) | 69(1)  |
| F(6)  | -1669(4)  | 2754(2) | 7531(6)  | 83(2)  |
| F(1') | 4899(14)  | 1903(3) | 9895(7)  | 72(3)  |
| F(2') | 5434(11)  | 2082(3) | 7724(13) | 69(3)  |
| F(3') | 3260(6)   | 1739(2) | 7654(12) | 59(2)  |
| F(4') | -1321(9)  | 2641(2) | 9033(18) | 86(3)  |
| F(5') | -1039(11) | 3350(3) | 9522(12) | 78(3)  |

F(6')                                      -1696(8)                                      3137(5)                                      7153(8)                                      88(3)

**Table S17.** Bond lengths [Å] and angles [°] for **1a**.

---

|             |          |
|-------------|----------|
| C(1)-N(1)   | 1.348(3) |
| C(1)-N(2)   | 1.364(3) |
| C(1)-S(1)   | 1.681(2) |
| C(2)-C(3)   | 1.380(3) |
| C(2)-C(7)   | 1.385(3) |
| C(2)-N(1)   | 1.432(3) |
| C(3)-C(4)   | 1.385(3) |
| C(4)-C(5)   | 1.391(3) |
| C(5)-C(6)   | 1.394(3) |
| C(5)-C(8)   | 1.530(3) |
| C(6)-C(7)   | 1.382(3) |
| C(8)-C(11)  | 1.530(3) |
| C(8)-C(10)  | 1.532(3) |
| C(8)-C(9)   | 1.536(3) |
| C(12)-C(13) | 1.388(3) |
| C(12)-C(17) | 1.389(3) |
| C(12)-N(2)  | 1.415(3) |
| C(13)-C(14) | 1.388(3) |
| C(14)-C(15) | 1.380(3) |
| C(14)-C(19) | 1.500(3) |
| C(15)-C(16) | 1.389(3) |
| C(16)-C(17) | 1.387(3) |
| C(16)-C(18) | 1.494(3) |
| C(18)-F(4') | 1.221(6) |
| C(18)-F(5') | 1.274(7) |
| C(18)-F(4)  | 1.294(4) |
| C(18)-F(6)  | 1.289(4) |
| C(18)-F(5)  | 1.361(4) |
| C(18)-F(6') | 1.373(7) |
| C(19)-F(1') | 1.186(6) |
| C(19)-F(3)  | 1.242(5) |
| C(19)-F(2') | 1.320(8) |
| C(19)-F(1)  | 1.332(4) |
| C(19)-F(2)  | 1.362(4) |

|                   |            |
|-------------------|------------|
| C(19)-F(3')       | 1.387(5)   |
| N(1)-C(1)-N(2)    | 114.94(19) |
| N(1)-C(1)-S(1)    | 121.33(17) |
| N(2)-C(1)-S(1)    | 123.71(17) |
| C(3)-C(2)-C(7)    | 119.4(2)   |
| C(3)-C(2)-N(1)    | 120.0(2)   |
| C(7)-C(2)-N(1)    | 120.6(2)   |
| C(2)-C(3)-C(4)    | 119.8(2)   |
| C(3)-C(4)-C(5)    | 121.8(2)   |
| C(4)-C(5)-C(6)    | 117.3(2)   |
| C(4)-C(5)-C(8)    | 123.1(2)   |
| C(6)-C(5)-C(8)    | 119.6(2)   |
| C(7)-C(6)-C(5)    | 121.3(2)   |
| C(6)-C(7)-C(2)    | 120.3(2)   |
| C(5)-C(8)-C(11)   | 112.30(19) |
| C(5)-C(8)-C(10)   | 110.65(19) |
| C(11)-C(8)-C(10)  | 108.14(19) |
| C(5)-C(8)-C(9)    | 108.21(19) |
| C(11)-C(8)-C(9)   | 108.2(2)   |
| C(10)-C(8)-C(9)   | 109.3(2)   |
| C(13)-C(12)-C(17) | 119.8(2)   |
| C(13)-C(12)-N(2)  | 117.4(2)   |
| C(17)-C(12)-N(2)  | 122.6(2)   |
| C(14)-C(13)-C(12) | 120.1(2)   |
| C(15)-C(14)-C(13) | 120.7(2)   |
| C(15)-C(14)-C(19) | 120.0(2)   |
| C(13)-C(14)-C(19) | 119.3(2)   |
| C(14)-C(15)-C(16) | 118.7(2)   |
| C(17)-C(16)-C(15) | 121.4(2)   |
| C(17)-C(16)-C(18) | 119.9(2)   |
| C(15)-C(16)-C(18) | 118.7(2)   |
| C(16)-C(17)-C(12) | 119.2(2)   |
| F(4')-C(18)-F(5') | 109.4(6)   |
| F(4)-C(18)-F(6)   | 110.1(4)   |
| F(4)-C(18)-F(5)   | 104.4(4)   |
| F(6)-C(18)-F(5)   | 101.9(3)   |
| F(4')-C(18)-F(6') | 105.8(6)   |

|                   |            |
|-------------------|------------|
| F(5')-C(18)-F(6') | 99.5(5)    |
| F(4')-C(18)-C(16) | 117.4(4)   |
| F(5')-C(18)-C(16) | 112.9(5)   |
| F(4)-C(18)-C(16)  | 115.3(3)   |
| F(6)-C(18)-C(16)  | 113.3(2)   |
| F(5)-C(18)-C(16)  | 110.6(3)   |
| F(6')-C(18)-C(16) | 110.2(3)   |
| F(1')-C(19)-F(2') | 109.1(6)   |
| F(3)-C(19)-F(1)   | 111.0(4)   |
| F(3)-C(19)-F(2)   | 105.9(4)   |
| F(1)-C(19)-F(2)   | 99.9(3)    |
| F(1')-C(19)-F(3') | 108.8(5)   |
| F(2')-C(19)-F(3') | 98.2(5)    |
| F(1')-C(19)-C(14) | 117.9(4)   |
| F(3)-C(19)-C(14)  | 115.4(3)   |
| F(2')-C(19)-C(14) | 111.4(4)   |
| F(1)-C(19)-C(14)  | 112.5(2)   |
| F(2)-C(19)-C(14)  | 110.8(2)   |
| F(3')-C(19)-C(14) | 109.6(3)   |
| C(1)-N(1)-C(2)    | 126.04(18) |
| C(1)-N(2)-C(12)   | 128.86(19) |

**Table S18.** Anisotropic displacement parameters ( $\text{\AA}^2 \times 10^3$ ) for **1a**. The anisotropic displacement factor exponent takes the form:  $-2\pi^2 [ h^2 a^{*2} U^{11} + \dots + 2 h k a^* b^* U^{12} ]$

|       | U <sup>11</sup> | U <sup>22</sup> | U <sup>33</sup> | U <sup>23</sup> | U <sup>13</sup> | U <sup>12</sup> |
|-------|-----------------|-----------------|-----------------|-----------------|-----------------|-----------------|
| C(1)  | 21(1)           | 21(1)           | 26(1)           | 1(1)            | 4(1)            | -1(1)           |
| C(2)  | 27(1)           | 17(1)           | 28(1)           | 1(1)            | 10(1)           | -3(1)           |
| C(3)  | 29(1)           | 21(1)           | 22(1)           | 1(1)            | 3(1)            | -6(1)           |
| C(4)  | 20(1)           | 25(1)           | 27(1)           | 4(1)            | 3(1)            | -2(1)           |
| C(5)  | 23(1)           | 18(1)           | 25(1)           | 5(1)            | 5(1)            | -1(1)           |
| C(6)  | 27(1)           | 32(1)           | 24(1)           | -3(1)           | 3(1)            | -4(1)           |
| C(7)  | 21(1)           | 33(1)           | 33(1)           | -2(1)           | 6(1)            | -4(1)           |
| C(8)  | 26(1)           | 26(1)           | 26(1)           | 2(1)            | 7(1)            | 1(1)            |
| C(9)  | 45(2)           | 29(1)           | 48(2)           | -3(1)           | 19(1)           | 4(1)            |
| C(10) | 33(1)           | 46(2)           | 28(1)           | 5(1)            | 9(1)            | 4(1)            |
| C(11) | 26(1)           | 45(2)           | 33(1)           | 5(1)            | 11(1)           | 3(1)            |

|       |        |         |        |        |        |        |
|-------|--------|---------|--------|--------|--------|--------|
| C(12) | 25(1)  | 20(1)   | 23(1)  | -2(1)  | 7(1)   | -4(1)  |
| C(13) | 21(1)  | 25(1)   | 28(1)  | -2(1)  | 6(1)   | -1(1)  |
| C(14) | 27(1)  | 20(1)   | 29(1)  | -2(1)  | 6(1)   | 0(1)   |
| C(15) | 28(1)  | 22(1)   | 30(1)  | 1(1)   | 7(1)   | -7(1)  |
| C(16) | 23(1)  | 25(1)   | 26(1)  | -1(1)  | 7(1)   | -3(1)  |
| C(17) | 25(1)  | 18(1)   | 28(1)  | -1(1)  | 6(1)   | 0(1)   |
| C(18) | 29(1)  | 29(1)   | 50(2)  | -2(1)  | 14(1)  | -4(1)  |
| C(19) | 32(1)  | 24(1)   | 48(2)  | 1(1)   | 9(1)   | -1(1)  |
| N(1)  | 32(1)  | 17(1)   | 33(1)  | -5(1)  | 16(1)  | -6(1)  |
| N(2)  | 28(1)  | 19(1)   | 36(1)  | -3(1)  | 17(1)  | -4(1)  |
| S(1)  | 29(1)  | 24(1)   | 31(1)  | -5(1)  | 13(1)  | -6(1)  |
| F(1)  | 70(3)  | 26(2)   | 190(6) | 40(2)  | 69(3)  | 15(2)  |
| F(2)  | 50(2)  | 45(2)   | 112(4) | -10(2) | -21(2) | 21(2)  |
| F(3)  | 201(8) | 69(4)   | 32(2)  | -1(2)  | 21(3)  | 84(4)  |
| F(4)  | 38(2)  | 36(2)   | 218(7) | 43(3)  | 61(4)  | 14(2)  |
| F(5)  | 43(2)  | 116(4)  | 59(2)  | 21(2)  | 32(2)  | 0(2)   |
| F(6)  | 24(2)  | 149(5)  | 75(3)  | -63(3) | 8(2)   | -22(2) |
| F(1') | 128(7) | 57(5)   | 26(3)  | 12(3)  | 6(4)   | 50(5)  |
| F(2') | 75(5)  | 30(3)   | 128(8) | 11(4)  | 73(5)  | 21(3)  |
| F(3') | 45(3)  | 22(3)   | 107(6) | -27(3) | 14(4)  | -2(2)  |
| F(4') | 51(4)  | 45(4)   | 172(8) | 44(5)  | 48(5)  | -3(3)  |
| F(5') | 56(4)  | 98(5)   | 90(4)  | -67(4) | 36(3)  | -3(4)  |
| F(6') | 24(3)  | 185(10) | 52(4)  | 27(6)  | 3(3)   | 15(5)  |

**Table S19.** Hydrogen coordinates ( $\times 10^4$ ) and isotropic displacement parameters ( $\text{\AA}^2 \times 10^3$ ) for **1a**.

|        | x     | y    | z    | U(eq) |
|--------|-------|------|------|-------|
| H(3)   | 8493  | 4644 | 8556 | 30    |
| H(4)   | 10108 | 4477 | 6728 | 29    |
| H(6)   | 6037  | 4133 | 3247 | 34    |
| H(7)   | 4416  | 4321 | 5045 | 35    |
| H(9A)  | 9792  | 3465 | 2658 | 59    |
| H(9B)  | 7961  | 3492 | 2918 | 59    |
| H(9C)  | 9490  | 3416 | 4462 | 59    |
| H(10A) | 8742  | 4705 | 2097 | 53    |



|        |       |      |      |    |
|--------|-------|------|------|----|
| H(10B) | 7541  | 4265 | 1467 | 53 |
| H(10C) | 9379  | 4263 | 1219 | 53 |
| H(11A) | 11251 | 4576 | 4461 | 51 |
| H(11B) | 11724 | 4135 | 3456 | 51 |
| H(11C) | 11552 | 4061 | 5297 | 51 |
| H(13)  | 5394  | 2941 | 8290 | 29 |
| H(15)  | 1257  | 2270 | 8786 | 32 |
| H(17)  | 1301  | 3710 | 8325 | 28 |
| H(1)   | 5319  | 4862 | 8524 | 31 |
| H(2)   | 5037  | 3763 | 7369 | 31 |

**Table S20.** Torsion angles [°] for **1a**.

---

|                         |           |
|-------------------------|-----------|
| C(7)-C(2)-C(3)-C(4)     | -2.5(3)   |
| N(1)-C(2)-C(3)-C(4)     | 177.7(2)  |
| C(2)-C(3)-C(4)-C(5)     | -0.7(3)   |
| C(3)-C(4)-C(5)-C(6)     | 2.8(3)    |
| C(3)-C(4)-C(5)-C(8)     | -174.7(2) |
| C(4)-C(5)-C(6)-C(7)     | -1.8(3)   |
| C(8)-C(5)-C(6)-C(7)     | 175.8(2)  |
| C(5)-C(6)-C(7)-C(2)     | -1.3(4)   |
| C(3)-C(2)-C(7)-C(6)     | 3.4(3)    |
| N(1)-C(2)-C(7)-C(6)     | -176.7(2) |
| C(4)-C(5)-C(8)-C(11)    | -8.9(3)   |
| C(6)-C(5)-C(8)-C(11)    | 173.6(2)  |
| C(4)-C(5)-C(8)-C(10)    | -129.9(2) |
| C(6)-C(5)-C(8)-C(10)    | 52.7(3)   |
| C(4)-C(5)-C(8)-C(9)     | 110.4(2)  |
| C(6)-C(5)-C(8)-C(9)     | -67.0(3)  |
| C(17)-C(12)-C(13)-C(14) | -0.8(3)   |
| N(2)-C(12)-C(13)-C(14)  | -176.5(2) |
| C(12)-C(13)-C(14)-C(15) | -0.5(3)   |
| C(12)-C(13)-C(14)-C(19) | 179.8(2)  |
| C(13)-C(14)-C(15)-C(16) | 1.0(3)    |
| C(19)-C(14)-C(15)-C(16) | -179.3(2) |
| C(14)-C(15)-C(16)-C(17) | -0.2(3)   |
| C(14)-C(15)-C(16)-C(18) | 177.9(2)  |
| C(15)-C(16)-C(17)-C(12) | -1.1(3)   |

|                         |            |
|-------------------------|------------|
| C(18)-C(16)-C(17)-C(12) | -179.1(2)  |
| C(13)-C(12)-C(17)-C(16) | 1.6(3)     |
| N(2)-C(12)-C(17)-C(16)  | 177.0(2)   |
| C(17)-C(16)-C(18)-F(4)  | -170.6(8)  |
| C(15)-C(16)-C(18)-F(4)  | 11.3(9)    |
| C(17)-C(16)-C(18)-F(5)  | -42.0(7)   |
| C(15)-C(16)-C(18)-F(5') | 140.0(6)   |
| C(17)-C(16)-C(18)-F(4)  | -6.3(5)    |
| C(15)-C(16)-C(18)-F(4)  | 175.7(4)   |
| C(17)-C(16)-C(18)-F(6)  | 121.9(5)   |
| C(15)-C(16)-C(18)-F(6)  | -56.2(5)   |
| C(17)-C(16)-C(18)-F(5)  | -124.4(3)  |
| C(15)-C(16)-C(18)-F(5)  | 57.5(4)    |
| C(17)-C(16)-C(18)-F(6') | 68.3(7)    |
| C(15)-C(16)-C(18)-F(6') | -109.7(7)  |
| C(15)-C(14)-C(19)-F(1') | -82.9(8)   |
| C(13)-C(14)-C(19)-F(1') | 96.8(8)    |
| C(15)-C(14)-C(19)-F(3)  | 111.6(5)   |
| C(13)-C(14)-C(19)-F(3)  | -68.7(5)   |
| C(15)-C(14)-C(19)-F(2') | 149.9(5)   |
| C(13)-C(14)-C(19)-F(2') | -30.4(6)   |
| C(15)-C(14)-C(19)-F(1)  | -17.1(5)   |
| C(13)-C(14)-C(19)-F(1)  | 162.6(4)   |
| C(15)-C(14)-C(19)-F(2)  | -128.1(3)  |
| C(13)-C(14)-C(19)-F(2)  | 51.7(4)    |
| C(15)-C(14)-C(19)-F(3') | 42.3(6)    |
| C(13)-C(14)-C(19)-F(3') | -138.0(5)  |
| N(2)-C(1)-N(1)-C(2)     | -0.6(3)    |
| S(1)-C(1)-N(1)-C(2)     | 177.96(18) |
| C(3)-C(2)-N(1)-C(1)     | -117.3(2)  |
| C(7)-C(2)-N(1)-C(1)     | 62.9(3)    |
| N(1)-C(1)-N(2)-C(12)    | -177.5(2)  |
| S(1)-C(1)-N(2)-C(12)    | 4.0(3)     |
| C(13)-C(12)-N(2)-C(1)   | -143.8(2)  |
| C(17)-C(12)-N(2)-C(1)   | 40.6(4)    |

---

**Table S21.** Hydrogen bonds for **1a** [ $\text{\AA}$  and  $^\circ$ ].

| D-H...A            | d(D-H) | d(H...A) | d(D...A)   | $\angle(\text{DHA})$ |
|--------------------|--------|----------|------------|----------------------|
| C(17)-H(17)...S(1) | 0.95   | 2.74     | 3.199(2)   | 110.8                |
| N(1)-H(1)...S(1)#1 | 0.88   | 2.53     | 3.3478(19) | 154.3                |
| C(17)-H(17)...S(1) | 0.95   | 2.74     | 3.199(2)   | 110.8                |
| N(1)-H(1)...S(1)#1 | 0.88   | 2.53     | 3.3478(19) | 154.3                |

Symmetry transformations used to generate equivalent atoms:

#1 -x+1,-y+1,-z+2

**Table S22: Coordinates of syn-anti conformation of  $[\text{Cu}(1)(3)]^+$  in Figure S36.**

| Center Number | Atomic Number | Atomic Type | Coordinates (Angstroms) |          |           |
|---------------|---------------|-------------|-------------------------|----------|-----------|
|               |               |             | X                       | Y        | Z         |
| 1             | 6             | 0           | 4.103278                | 1.535796 | 2.031218  |
| 2             | 1             | 0           | 4.106536                | 0.671246 | 2.683292  |
| 3             | 6             | 0           | 4.844781                | 2.677400 | 2.367174  |
| 4             | 1             | 0           | 5.422223                | 2.691786 | 3.282658  |
| 5             | 6             | 0           | 4.816931                | 3.759653 | 1.517671  |
| 6             | 1             | 0           | 5.376539                | 4.660749 | 1.742207  |
| 7             | 6             | 0           | 4.046777                | 3.696286 | 0.338337  |
| 8             | 6             | 0           | 3.973286                | 4.788135 | -0.585347 |
| 9             | 1             | 0           | 4.531506                | 5.691081 | -0.366385 |
| 10            | 6             | 0           | 3.221124                | 4.694071 | -1.710999 |
| 11            | 1             | 0           | 3.166427                | 5.519935 | -2.410869 |
| 12            | 6             | 0           | 2.480889                | 3.503467 | -2.002254 |
| 13            | 6             | 0           | 2.520403                | 2.397864 | -1.116228 |
| 14            | 6             | 0           | 3.328805                | 2.501391 | 0.081000  |
| 15            | 6             | 0           | 1.704300                | 3.370154 | -3.168704 |

|    |   |   |           |           |           |
|----|---|---|-----------|-----------|-----------|
| 16 | 1 | 0 | 1.667995  | 4.180433  | -3.888171 |
| 17 | 6 | 0 | 1.014588  | 2.203997  | -3.388660 |
| 18 | 1 | 0 | 0.455483  | 2.064363  | -4.306148 |
| 19 | 6 | 0 | 1.077157  | 1.154372  | -2.442298 |
| 20 | 6 | 0 | 3.792097  | -2.817248 | -0.407252 |
| 21 | 6 | 0 | 3.820261  | -4.200944 | -0.699575 |
| 22 | 1 | 0 | 4.722180  | -4.629844 | -1.117440 |
| 23 | 6 | 0 | 2.721433  | -4.983229 | -0.433079 |
| 24 | 1 | 0 | 2.732266  | -6.045939 | -0.649956 |
| 25 | 6 | 0 | 1.580630  | -4.403911 | 0.160903  |
| 26 | 6 | 0 | 1.625537  | -3.014246 | 0.421571  |
| 27 | 6 | 0 | 0.507665  | -2.388812 | 1.095240  |
| 28 | 6 | 0 | -0.606092 | -3.176655 | 1.468075  |
| 29 | 6 | 0 | -0.633933 | -4.571826 | 1.143586  |
| 30 | 1 | 0 | -1.505441 | -5.151652 | 1.425338  |
| 31 | 6 | 0 | 0.418606  | -5.161897 | 0.518186  |
| 32 | 1 | 0 | 0.402424  | -6.222147 | 0.292645  |
| 33 | 6 | 0 | -1.642796 | -2.532380 | 2.176776  |
| 34 | 1 | 0 | -2.525088 | -3.091186 | 2.468676  |
| 35 | 6 | 0 | -1.510974 | -1.205050 | 2.514785  |
| 36 | 1 | 0 | -2.278777 | -0.701227 | 3.087864  |
| 37 | 6 | 0 | -0.355099 | -0.488660 | 2.127347  |
| 38 | 6 | 0 | -0.148022 | 0.916893  | 2.596334  |
| 39 | 6 | 0 | 0.645611  | 1.138342  | 3.739072  |
| 40 | 6 | 0 | 0.811477  | 2.445932  | 4.196945  |
| 41 | 1 | 0 | 1.416292  | 2.616604  | 5.082366  |
| 42 | 6 | 0 | 0.212363  | 3.534803  | 3.560653  |
| 43 | 6 | 0 | -0.570222 | 3.286252  | 2.432925  |
| 44 | 1 | 0 | -1.047555 | 4.117150  | 1.922921  |
| 45 | 6 | 0 | -0.769640 | 1.994248  | 1.942615  |
| 46 | 6 | 0 | -1.648898 | 1.775984  | 0.736007  |

|    |   |   |           |           |           |
|----|---|---|-----------|-----------|-----------|
| 47 | 1 | 0 | -1.920164 | 2.722231  | 0.267627  |
| 48 | 1 | 0 | -2.581796 | 1.272770  | 1.008680  |
| 49 | 1 | 0 | -1.149287 | 1.158665  | -0.014541 |
| 50 | 6 | 0 | 1.288682  | -0.006213 | 4.489395  |
| 51 | 1 | 0 | 0.537551  | -0.689358 | 4.898195  |
| 52 | 1 | 0 | 1.883115  | 0.364846  | 5.325446  |
| 53 | 1 | 0 | 1.940736  | -0.602031 | 3.844896  |
| 54 | 6 | 0 | 0.373034  | 4.934091  | 4.101968  |
| 55 | 1 | 0 | 0.284463  | 5.681710  | 3.310990  |
| 56 | 1 | 0 | 1.340632  | 5.065693  | 4.591358  |
| 57 | 1 | 0 | -0.400410 | 5.153005  | 4.845655  |
| 58 | 6 | 0 | 5.022199  | -1.987102 | -0.593480 |
| 59 | 6 | 0 | 5.493919  | -1.637616 | -1.868876 |
| 60 | 6 | 0 | 6.666413  | -0.878230 | -1.971135 |
| 61 | 1 | 0 | 7.023590  | -0.604588 | -2.959388 |
| 62 | 6 | 0 | 7.389881  | -0.478942 | -0.853463 |
| 63 | 6 | 0 | 6.917167  | -0.866793 | 0.405584  |
| 64 | 1 | 0 | 7.484832  | -0.594586 | 1.290328  |
| 65 | 6 | 0 | 5.753916  | -1.613480 | 0.559333  |
| 66 | 6 | 0 | 5.334960  | -2.063009 | 1.941371  |
| 67 | 1 | 0 | 4.329891  | -1.720424 | 2.198294  |
| 68 | 1 | 0 | 6.029809  | -1.688887 | 2.694600  |
| 69 | 1 | 0 | 5.324854  | -3.154893 | 2.018096  |
| 70 | 6 | 0 | 8.663257  | 0.319505  | -0.983254 |
| 71 | 1 | 0 | 8.851152  | 0.607486  | -2.018762 |
| 72 | 1 | 0 | 9.524992  | -0.258340 | -0.635437 |
| 73 | 1 | 0 | 8.622196  | 1.231306  | -0.380482 |
| 74 | 6 | 0 | 4.795342  | -2.033234 | -3.151550 |
| 75 | 1 | 0 | 5.505035  | -2.485154 | -3.849356 |
| 76 | 1 | 0 | 4.372827  | -1.156806 | -3.653013 |
| 77 | 1 | 0 | 3.988852  | -2.748626 | -2.994447 |

|     |    |   |           |           |           |
|-----|----|---|-----------|-----------|-----------|
| 78  | 6  | 0 | 0.350807  | -0.115193 | -2.731847 |
| 79  | 6  | 0 | 1.085814  | -1.302099 | -2.793798 |
| 80  | 1  | 0 | 2.141137  | -1.260396 | -2.564131 |
| 81  | 6  | 0 | 0.499109  | -2.508944 | -3.157047 |
| 82  | 1  | 0 | 1.096491  | -3.411000 | -3.205103 |
| 83  | 6  | 0 | -0.851206 | -2.538774 | -3.490205 |
| 84  | 1  | 0 | -1.317793 | -3.461928 | -3.812838 |
| 85  | 6  | 0 | -1.605228 | -1.371586 | -3.442974 |
| 86  | 1  | 0 | -2.643894 | -1.388433 | -3.748025 |
| 87  | 6  | 0 | -1.030209 | -0.155802 | -3.044531 |
| 88  | 6  | 0 | -3.087102 | 1.205205  | -2.451901 |
| 89  | 6  | 0 | -4.780456 | -0.019801 | -1.041947 |
| 90  | 6  | 0 | -4.731074 | -0.883046 | 0.053693  |
| 91  | 1  | 0 | -3.798927 | -1.372037 | 0.311728  |
| 92  | 6  | 0 | -5.868686 | -1.118363 | 0.819769  |
| 93  | 6  | 0 | -7.072213 | -0.498289 | 0.507231  |
| 94  | 1  | 0 | -7.959053 | -0.682632 | 1.096911  |
| 95  | 6  | 0 | -7.116353 | 0.354034  | -0.595539 |
| 96  | 6  | 0 | -5.990331 | 0.598025  | -1.375155 |
| 97  | 1  | 0 | -6.050792 | 1.253534  | -2.229190 |
| 98  | 6  | 0 | -8.408316 | 1.062935  | -0.927376 |
| 99  | 6  | 0 | -5.744016 | -2.021323 | 2.016121  |
| 100 | 29 | 0 | 2.210309  | -0.165510 | 0.359259  |
| 101 | 9  | 0 | -8.507851 | 2.230072  | -0.257845 |
| 102 | 9  | 0 | -9.481323 | 0.319434  | -0.590882 |
| 103 | 9  | 0 | -8.502529 | 1.345784  | -2.240293 |
| 104 | 7  | 0 | 3.370822  | 1.443013  | 0.927958  |
| 105 | 7  | 0 | 1.827700  | 1.248541  | -1.340920 |
| 106 | 7  | 0 | 0.600545  | -1.067336 | 1.396920  |
| 107 | 7  | 0 | 2.701599  | -2.243970 | 0.109141  |
| 108 | 7  | 0 | -1.825376 | 1.014239  | -2.980279 |

|     |    |   |           |           |           |
|-----|----|---|-----------|-----------|-----------|
| 109 | 1  | 0 | -1.431036 | 1.883685  | -3.304874 |
| 110 | 7  | 0 | -3.588705 | 0.123000  | -1.783542 |
| 111 | 1  | 0 | -2.928866 | -0.627916 | -1.627602 |
| 112 | 16 | 0 | -3.821765 | 2.695558  | -2.621000 |
| 113 | 9  | 0 | -4.992857 | -1.446496 | 2.993750  |
| 114 | 9  | 0 | -5.110591 | -3.181541 | 1.700946  |
| 115 | 9  | 0 | -6.925933 | -2.339097 | 2.556932  |

**Table S23: Coordinates of anti-anti conformation of [Cu(1)(3)]<sup>+</sup> in Figure S37**

| -----  |        |        |                         |           |           |
|--------|--------|--------|-------------------------|-----------|-----------|
| Center | Atomic | Atomic | Coordinates (Angstroms) |           |           |
| Number | Number | Type   | X                       | Y         | Z         |
| -----  |        |        |                         |           |           |
| 1      | 6      | 0      | 3.972381                | 0.694409  | 3.001263  |
| 2      | 1      | 0      | 4.725724                | -0.069902 | 2.855442  |
| 3      | 6      | 0      | 4.035539                | 1.544369  | 4.114931  |
| 4      | 1      | 0      | 4.838316                | 1.431033  | 4.832356  |
| 5      | 6      | 0      | 3.068182                | 2.512077  | 4.265171  |
| 6      | 1      | 0      | 3.085971                | 3.192918  | 5.108910  |
| 7      | 6      | 0      | 2.037012                | 2.617402  | 3.309583  |
| 8      | 6      | 0      | 1.000392                | 3.600335  | 3.405474  |
| 9      | 1      | 0      | 1.018706                | 4.294683  | 4.237656  |
| 10     | 6      | 0      | 0.014478                | 3.659585  | 2.473810  |
| 11     | 1      | 0      | -0.770060               | 4.404236  | 2.545974  |
| 12     | 6      | 0      | -0.023444               | 2.734568  | 1.381651  |
| 13     | 6      | 0      | 0.986211                | 1.752365  | 1.240994  |
| 14     | 6      | 0      | 2.047096                | 1.704796  | 2.224470  |
| 15     | 6      | 0      | -1.047925               | 2.752520  | 0.413668  |
| 16     | 1      | 0      | -1.821054               | 3.511482  | 0.461855  |
| 17     | 6      | 0      | -1.057201               | 1.806320  | -0.578970 |

|    |   |   |           |           |           |
|----|---|---|-----------|-----------|-----------|
| 18 | 1 | 0 | -1.826982 | 1.803031  | -1.340359 |
| 19 | 6 | 0 | -0.030287 | 0.831528  | -0.632853 |
| 20 | 6 | 0 | 4.909372  | 1.034424  | -1.790022 |
| 21 | 6 | 0 | 5.712024  | 0.985527  | -2.952886 |
| 22 | 1 | 0 | 6.154293  | 1.901481  | -3.323586 |
| 23 | 6 | 0 | 5.935704  | -0.214905 | -3.582616 |
| 24 | 1 | 0 | 6.553932  | -0.268733 | -4.472095 |
| 25 | 6 | 0 | 5.372195  | -1.394306 | -3.053082 |
| 26 | 6 | 0 | 4.569669  | -1.265134 | -1.893848 |
| 27 | 6 | 0 | 3.990649  | -2.453507 | -1.302741 |
| 28 | 6 | 0 | 4.253852  | -3.713424 | -1.891507 |
| 29 | 6 | 0 | 5.057409  | -3.799711 | -3.073801 |
| 30 | 1 | 0 | 5.234925  | -4.776695 | -3.508601 |
| 31 | 6 | 0 | 5.593666  | -2.684487 | -3.633786 |
| 32 | 1 | 0 | 6.207254  | -2.753366 | -4.524801 |
| 33 | 6 | 0 | 3.706341  | -4.849850 | -1.261950 |
| 34 | 1 | 0 | 3.886021  | -5.833733 | -1.681231 |
| 35 | 6 | 0 | 2.966841  | -4.697965 | -0.113931 |
| 36 | 1 | 0 | 2.555332  | -5.555388 | 0.403215  |
| 37 | 6 | 0 | 2.743015  | -3.408030 | 0.415667  |
| 38 | 6 | 0 | 1.980214  | -3.252474 | 1.692100  |
| 39 | 6 | 0 | 2.684551  | -3.085144 | 2.900310  |
| 40 | 6 | 0 | 1.962836  | -2.969271 | 4.088282  |
| 41 | 1 | 0 | 2.505963  | -2.847940 | 5.020488  |
| 42 | 6 | 0 | 0.567912  | -3.024503 | 4.114976  |
| 43 | 6 | 0 | -0.102758 | -3.218562 | 2.907481  |
| 44 | 1 | 0 | -1.186301 | -3.290593 | 2.910436  |
| 45 | 6 | 0 | 0.577334  | -3.342663 | 1.693984  |
| 46 | 6 | 0 | -0.196754 | -3.598175 | 0.421332  |
| 47 | 1 | 0 | -1.266727 | -3.454797 | 0.584609  |
| 48 | 1 | 0 | -0.063348 | -4.626412 | 0.070246  |



|    |   |   |           |           |           |
|----|---|---|-----------|-----------|-----------|
| 49 | 1 | 0 | 0.116906  | -2.939950 | -0.391488 |
| 50 | 6 | 0 | 4.195899  | -3.095394 | 2.938576  |
| 51 | 1 | 0 | 4.588914  | -4.090200 | 2.704082  |
| 52 | 1 | 0 | 4.560674  | -2.826918 | 3.931131  |
| 53 | 1 | 0 | 4.630257  | -2.404903 | 2.212249  |
| 54 | 6 | 0 | -0.187990 | -2.872746 | 5.412018  |
| 55 | 1 | 0 | -1.183403 | -3.316541 | 5.348932  |
| 56 | 1 | 0 | -0.313843 | -1.815784 | 5.670345  |
| 57 | 1 | 0 | 0.342713  | -3.348120 | 6.239931  |
| 58 | 6 | 0 | 4.744825  | 2.332329  | -1.064617 |
| 59 | 6 | 0 | 3.878694  | 3.327680  | -1.554848 |
| 60 | 6 | 0 | 3.782372  | 4.534991  | -0.860052 |
| 61 | 1 | 0 | 3.106109  | 5.298200  | -1.232516 |
| 62 | 6 | 0 | 4.536098  | 4.792929  | 0.285376  |
| 63 | 6 | 0 | 5.406354  | 3.799029  | 0.734945  |
| 64 | 1 | 0 | 6.016703  | 3.986055  | 1.613020  |
| 65 | 6 | 0 | 5.530555  | 2.573455  | 0.079254  |
| 66 | 6 | 0 | 6.538748  | 1.560023  | 0.571446  |
| 67 | 1 | 0 | 6.085556  | 0.581164  | 0.741966  |
| 68 | 1 | 0 | 6.998291  | 1.892579  | 1.503237  |
| 69 | 1 | 0 | 7.342779  | 1.416447  | -0.157764 |
| 70 | 6 | 0 | 4.446379  | 6.125075  | 0.988432  |
| 71 | 1 | 0 | 5.126539  | 6.851641  | 0.531636  |
| 72 | 1 | 0 | 4.719945  | 6.040713  | 2.042226  |
| 73 | 1 | 0 | 3.438531  | 6.541765  | 0.928447  |
| 74 | 6 | 0 | 3.073631  | 3.135498  | -2.820032 |
| 75 | 1 | 0 | 2.355511  | 3.946542  | -2.947119 |
| 76 | 1 | 0 | 2.517238  | 2.196212  | -2.820682 |
| 77 | 1 | 0 | 3.715797  | 3.127529  | -3.706486 |
| 78 | 6 | 0 | -0.078762 | -0.185933 | -1.718226 |
| 79 | 6 | 0 | 1.039332  | -0.400433 | -2.533610 |

|     |    |   |           |           |           |
|-----|----|---|-----------|-----------|-----------|
| 80  | 1  | 0 | 1.949199  | 0.140511  | -2.315827 |
| 81  | 6  | 0 | 0.982813  | -1.258219 | -3.624229 |
| 82  | 1  | 0 | 1.853461  | -1.387685 | -4.256012 |
| 83  | 6  | 0 | -0.199914 | -1.938514 | -3.909764 |
| 84  | 1  | 0 | -0.256617 | -2.606663 | -4.760734 |
| 85  | 6  | 0 | -1.308570 | -1.770160 | -3.091265 |
| 86  | 1  | 0 | -2.223838 | -2.314559 | -3.284145 |
| 87  | 6  | 0 | -1.259206 | -0.898582 | -2.002574 |
| 88  | 6  | 0 | -3.640165 | -0.363232 | -1.476203 |
| 89  | 6  | 0 | -5.901504 | -0.250474 | -0.363274 |
| 90  | 6  | 0 | -6.802549 | -1.162958 | 0.187528  |
| 91  | 1  | 0 | -6.472823 | -2.159500 | 0.457741  |
| 92  | 6  | 0 | -8.128347 | -0.797283 | 0.400854  |
| 93  | 6  | 0 | -8.576654 | 0.473325  | 0.057426  |
| 94  | 1  | 0 | -9.604520 | 0.759471  | 0.230510  |
| 95  | 6  | 0 | -7.670804 | 1.377799  | -0.492007 |
| 96  | 6  | 0 | -6.339865 | 1.032225  | -0.699816 |
| 97  | 1  | 0 | -5.652832 | 1.754287  | -1.111616 |
| 98  | 6  | 0 | -8.140700 | 2.752466  | -0.900111 |
| 99  | 6  | 0 | -9.088487 | -1.816966 | 0.959427  |
| 100 | 29 | 0 | 2.859626  | -0.311080 | 0.305242  |
| 101 | 9  | 0 | -7.164586 | 3.675928  | -0.754597 |
| 102 | 9  | 0 | -9.194496 | 3.159461  | -0.166237 |
| 103 | 9  | 0 | -8.519626 | 2.780053  | -2.193408 |
| 104 | 7  | 0 | 3.018004  | 0.768869  | 2.082126  |
| 105 | 7  | 0 | 0.984413  | 0.831876  | 0.237859  |
| 106 | 7  | 0 | 3.230668  | -2.317430 | -0.182129 |
| 107 | 7  | 0 | 4.337759  | -0.066491 | -1.295410 |
| 108 | 7  | 0 | -2.383704 | -0.819437 | -1.130762 |
| 109 | 1  | 0 | -2.188486 | -0.914960 | -0.142983 |
| 110 | 7  | 0 | -4.550553 | -0.650683 | -0.481972 |

|     |    |   |            |           |           |
|-----|----|---|------------|-----------|-----------|
| 111 | 1  | 0 | -4.298701  | -1.423666 | 0.119205  |
| 112 | 16 | 0 | -3.968014  | 0.433266  | -2.899270 |
| 113 | 9  | 0 | -8.484156  | -2.622367 | 1.862464  |
| 114 | 9  | 0 | -9.577265  | -2.616933 | -0.011327 |
| 115 | 9  | 0 | -10.138889 | -1.239151 | 1.569067  |

---

## References

1. Gaussian 16, Revision C.01, M. J. Frisch, G. W. Trucks, H. B. Schlegel, G.E. Scuseria, M. A. Robb, J. R. Cheeseman, G. Scalmani, V. Barone, G. A. Petersson, H. Nakatsuji, X. Li, M. Caricato, A. V. Marenich, J. Bloino, B. G. Janesko, R. Gomperts, B. Mennucci, H. P. Hratchian, J. V. Ortiz, A. F. Izmaylov, J. L. Sonnenberg, D. Williams-Young, F. Ding, F. Lipparini, F. Egidi, J. Goings, B. Peng, A. Petrone, T. Henderson, D. Ranasinghe, V. G. Zakrzewski, J. Gao, N. Rega, G. Zheng, W. Liang, M. Hada, M. Ehara, K. Toyota, R. Fukuda, J. Hasegawa, M. Ishida, T. Nakajima, Y. Honda, O. Kitao, H. Nakai, T. Vreven, K. Throssell, J. A. Montgomery Jr, J. E. Peralta, F. Ogliaro, M. Bearpark, J. J. Heyd, E. N. Brothers, K. N. Kudin, V. N. Staroverov, T. Keith, R. Kobayashi, J. Normand, K. Raghavachari, A. Rendell, J. C. Burant, S. S. Iyengar, J. Tomasi, M. Cossi, J. M. Millam, M. Klene, C. Adamo, R. Cammi, J. W. Ochterski, R. L. Martin, K. Morokuma, O. Farkas, J. B. Foresman, D. J. Fox, Gaussian, Inc., Wallingford CT, 2016.
